# Supplementary material for: Synthesis, structural characterization and molecular docking analysis of novel β-ketoiminato palladium(ii) complexes with anticancer properties
Source: Royal Society of Chemistry journal article supplement (doi:10.1039/d5ra09325b), 2026-04-29
Supplement: d5ra09325b1.pdf [file d5ra09325b1.pdf]

## **Synthesis, Structural characterization and molecular docking analysis of novel $\beta$ -ketiminate palladium(II) complexes with anticancer properties**

Deeb Taher,<sup>a\*</sup> Belal Khalil,<sup>a</sup> Sara AlNaimat,<sup>a</sup> Morad Mustafa,<sup>b,c</sup> Zakariyya Ishtaiwi,<sup>d</sup> Wissam Helal,<sup>a</sup> Marcus Korb,<sup>c</sup> Tuqa Abu Thiab,<sup>f</sup> Amer Imraish,<sup>f</sup> Tareq Alhindi,<sup>f</sup> Ahmad Makahleh,<sup>a</sup> Mohammad W. Amer,<sup>a</sup> Duha H. Abdelrahman,<sup>a</sup>

a Chemistry Department, The University of Jordan, Amman, 11942, Jordan.

b Department of Pharmacy, College of Pharmacy, Al-Zaytoonah University, P.O. Box:130, Amman 11733, Jordan.

c Chemistry Program, Science Division, New York University Abu Dhabi, P.O. Box: 129188, Abu Dhabi, United Arab Emirates.

d Department of Chemistry, Faculty of Science, Al-Balqa Applied University, Al Salt 19117, Jordan.

e School of Molecular Sciences, The University of Western Australia, 35 Stirling Highway, Crawley, Perth, Western Australia 6009, Australia.

f Department of Biological Sciences, The University of Jordan, Amman, 11942, Jordan.

## Table of Contents

|                    |                                                                                                                                                                                                                                 |    |
|--------------------|---------------------------------------------------------------------------------------------------------------------------------------------------------------------------------------------------------------------------------|----|
|                    | <b>1. Experimental</b>                                                                                                                                                                                                          | 5  |
| <b>Table S1.</b>   | IR (KBr) data for <b>3a–j</b> and <b>4a–j</b> .                                                                                                                                                                                 | 15 |
| <b>Table S2.</b>   | NMR ( <sup>1</sup> H, <sup>13</sup> C{ <sup>1</sup> H}) data for <b>3a–j</b> .                                                                                                                                                  | 16 |
| <b>Table S3.</b>   | NMR ( <sup>1</sup> H, <sup>13</sup> C{ <sup>1</sup> H}) data for <b>4a–j</b> .                                                                                                                                                  | 17 |
| <b>Table S4.</b>   | Analysis for each peak observed from HRMS for complexes <b>4a–j</b> .                                                                                                                                                           | 18 |
| <b>Table S5.</b>   | Crystal data and structure refinement for compound <b>4c</b> .                                                                                                                                                                  | 20 |
| <b>Table S6.</b>   | Selected experimental and calculated bond distances (Å) for compound <b>4c</b> .                                                                                                                                                | 21 |
| <b>Table S7.</b>   | Selected experimental and calculated bond angles (°) for compound <b>4c</b> .                                                                                                                                                   | 22 |
| <b>Table S8.</b>   | Interaction topology energy table for <b>4c</b> at the HF/3-21G level of theory.                                                                                                                                                | 23 |
| <b>Table S9.</b>   | Absolute HOMO and LUMO energies and the HOMO-LUMO gap for <b>3a–j</b> calculated at PBE0/def2-TZVP/CPCM (chloroform). All energy units are given in eV.                                                                         | 24 |
| <b>Table S10.</b>  | Absolute HOMO and LUMO energies and the HOMO-LUMO gap for <b>4a–j</b> calculated at PBE0/def2-TZVP/CPCM (chloroform). All energy units are given in eV.                                                                         | 25 |
| <b>Table S11.</b>  | Experimental and calculated [TD-CAM-B3LYP/def2-TZVP/CPCM (chloroform)] UV–Vis absorption bands of ligands <b>3a–j</b> in chloroform solvent.                                                                                    | 26 |
| <b>Table S12.</b>  | Experimental and calculated [TD-CAM-B3LYP/def2-TZVP/CPCM (chloroform)] UV–Vis absorption bands of complexes <b>4a–j</b> in chloroform solvent.                                                                                  | 27 |
| <b>Table S13.</b>  | TGA data of <b>4a–j</b> .                                                                                                                                                                                                       | 28 |
| <b>Table S14.</b>  | Chemosensitivity results of complexes <b>4</b> and <b>5</b> against fibroblast, MCF-7 and HCT-116. Values are stated as 50% inhibitory concentrations (IC <sub>50</sub> ) ± Standard Deviation (SD) and are triplicate repeats. | 29 |
| <b>Table S15.</b>  | Chemosensitivity results of ligands against fibroblast, MCF-7 and HCT-116.                                                                                                                                                      | 30 |
| <b>Table S16.</b>  | Chemosensitivity results of complexes <b>6</b> and <b>7</b> , against HT-29 and MCF-7.                                                                                                                                          | 31 |
| <b>Table S17.</b>  | Lowest Binding Energy Values of Methyl- and Chloride-substituted Pd(II) Complexes with Targeted Proteins in MCF-7 (Breast Cancer).                                                                                              | 32 |
| <b>Table S18.</b>  | Lowest Binding Energy Values of Methyl- and Chloride-substituted Pd(II) Complexes with Targeted Proteins in HCT-116 (Colon Cancer).                                                                                             | 33 |
| <b>Table S19.</b>  | List of qPCR primers.                                                                                                                                                                                                           | 34 |
| <b>Table S20.</b>  | Bax:Bcl-2 ratio in different cell types after treatment with different concentration of compounds.                                                                                                                              | 35 |
| <b>Figure S1.</b>  | Infrared spectrum (KBr) of <b>3a</b> .                                                                                                                                                                                          | 36 |
| <b>Figure S2.</b>  | Infrared spectrum (KBr) of <b>3b</b> .                                                                                                                                                                                          | 36 |
| <b>Figure S3.</b>  | Infrared spectrum (KBr) of <b>3c</b> .                                                                                                                                                                                          | 37 |
| <b>Figure S4.</b>  | Infrared spectrum (KBr) of <b>3d</b> .                                                                                                                                                                                          | 37 |
| <b>Figure S5.</b>  | Infrared spectrum (KBr) of <b>3e</b> .                                                                                                                                                                                          | 38 |
| <b>Figure S6.</b>  | Infrared spectrum (KBr) of <b>3f</b> .                                                                                                                                                                                          | 38 |
| <b>Figure S7.</b>  | Infrared spectrum (KBr) of <b>3g</b> .                                                                                                                                                                                          | 39 |
| <b>Figure S8.</b>  | Infrared spectrum (KBr) of <b>3h</b> .                                                                                                                                                                                          | 39 |
| <b>Figure S9.</b>  | Infrared spectrum (KBr) of <b>3i</b> .                                                                                                                                                                                          | 40 |
| <b>Figure S10.</b> | Infrared spectrum (KBr) of <b>3j</b> .                                                                                                                                                                                          | 40 |
| <b>Figure S11.</b> | Infrared spectrum (KBr) of <b>4a</b> .                                                                                                                                                                                          | 41 |
| <b>Figure S12.</b> | Infrared spectrum (KBr) of <b>4b</b> .                                                                                                                                                                                          | 41 |
| <b>Figure S13.</b> | Infrared spectrum (KBr) of <b>4c</b> .                                                                                                                                                                                          | 42 |
| <b>Figure S14.</b> | Infrared spectrum (KBr) of <b>4d</b> .                                                                                                                                                                                          | 42 |
| <b>Figure S15.</b> | Infrared spectrum (KBr) of <b>4e</b> .                                                                                                                                                                                          | 43 |
| <b>Figure S16.</b> | Infrared spectrum (KBr) of <b>4f</b> .                                                                                                                                                                                          | 43 |
| <b>Figure S17.</b> | Infrared spectrum (KBr) of <b>4g</b> .                                                                                                                                                                                          | 44 |
| <b>Figure S18.</b> | Infrared spectrum (KBr) of <b>4h</b> .                                                                                                                                                                                          | 44 |
| <b>Figure S19.</b> | Infrared spectrum (KBr) of <b>4i</b> .                                                                                                                                                                                          | 45 |
| <b>Figure S20.</b> | Infrared spectrum (KBr) of <b>4j</b> .                                                                                                                                                                                          | 45 |
| <b>Figure S21.</b> | <sup>1</sup> H NMR spectrum (CDCl <sub>3</sub> , 25 °C, 500.303 MHz) of <b>3a</b> .                                                                                                                                             | 46 |
| <b>Figure S22.</b> | <sup>1</sup> H NMR spectrum (CDCl <sub>3</sub> , 25 °C, 500.303 MHz) of <b>3b</b> .                                                                                                                                             | 46 |
| <b>Figure S23.</b> | <sup>1</sup> H NMR spectrum (CDCl <sub>3</sub> , 25 °C, 500.303 MHz) of <b>3c</b> .                                                                                                                                             | 47 |
| <b>Figure S24.</b> | <sup>1</sup> H NMR spectrum (CDCl <sub>3</sub> , 25 °C, 500.303 MHz) of <b>3d</b> .                                                                                                                                             | 47 |
| <b>Figure S25.</b> | <sup>1</sup> H NMR spectrum (CDCl <sub>3</sub> , 25 °C, 500.303 MHz) of <b>3e</b> .                                                                                                                                             | 48 |
| <b>Figure S26.</b> | <sup>1</sup> H NMR spectrum (CDCl <sub>3</sub> , 25 °C, 500.303 MHz) of <b>3f</b> .                                                                                                                                             | 48 |
| <b>Figure S27.</b> | <sup>1</sup> H NMR spectrum (CDCl <sub>3</sub> , 25 °C, 500.303 MHz) of <b>3g</b> .                                                                                                                                             | 49 |

|             |                                                                                                                                                                                                                                                                                                    |    |
|-------------|----------------------------------------------------------------------------------------------------------------------------------------------------------------------------------------------------------------------------------------------------------------------------------------------------|----|
| Figure S28. | <sup>1</sup> H NMR spectrum (CDCl <sub>3</sub> , 25 °C, 500.303 MHz) of <b>3h</b> .                                                                                                                                                                                                                | 49 |
| Figure S29. | <sup>1</sup> H NMR spectrum (CDCl <sub>3</sub> , 25 °C, 500.303 MHz) of <b>3i</b> .                                                                                                                                                                                                                | 50 |
| Figure S30. | <sup>1</sup> H NMR spectrum (CDCl <sub>3</sub> , 25 °C, 500.303 MHz) of <b>3j</b> .                                                                                                                                                                                                                | 50 |
| Figure S31. | <sup>1</sup> H NMR spectrum (CDCl <sub>3</sub> , 25 °C, 500.303 MHz) of <b>4a</b> .                                                                                                                                                                                                                | 51 |
| Figure S32. | <sup>1</sup> H NMR spectrum (CDCl <sub>3</sub> , 25 °C, 500.303 MHz) of <b>4b</b> .                                                                                                                                                                                                                | 51 |
| Figure S33. | <sup>1</sup> H NMR spectrum (CDCl <sub>3</sub> , 25 °C, 500.303 MHz) of <b>4c</b> .                                                                                                                                                                                                                | 52 |
| Figure S34. | <sup>1</sup> H NMR spectrum (CDCl <sub>3</sub> , 25 °C, 500.303 MHz) of <b>4d</b> .                                                                                                                                                                                                                | 52 |
| Figure S35. | <sup>1</sup> H NMR spectrum (CDCl <sub>3</sub> , 25 °C, 500.303 MHz) of <b>4e</b> .                                                                                                                                                                                                                | 53 |
| Figure S36. | <sup>1</sup> H NMR spectrum (CDCl <sub>3</sub> , 25 °C, 500.303 MHz) of <b>4f</b> .                                                                                                                                                                                                                | 53 |
| Figure S37. | <sup>1</sup> H NMR spectrum (CDCl <sub>3</sub> , 25 °C, 500.303 MHz) of <b>4g</b> .                                                                                                                                                                                                                | 54 |
| Figure S38. | <sup>1</sup> H NMR spectrum (CDCl <sub>3</sub> , 25 °C, 500.303 MHz) of <b>4h</b> .                                                                                                                                                                                                                | 54 |
| Figure S39. | <sup>1</sup> H NMR spectrum (CDCl <sub>3</sub> , 25 °C, 500.303 MHz) of <b>4i</b> .                                                                                                                                                                                                                | 55 |
| Figure S40. | <sup>1</sup> H NMR spectrum (CDCl <sub>3</sub> , 25 °C, 500.303 MHz) of <b>4j</b> .                                                                                                                                                                                                                | 55 |
| Figure S41. | <sup>13</sup> C{ <sup>1</sup> H} NMR spectrum (CDCl <sub>3</sub> , 25 °C, 125.813 MHz MHz) of <b>3a</b> .                                                                                                                                                                                          | 56 |
| Figure S42. | <sup>13</sup> C{ <sup>1</sup> H} NMR spectrum (CDCl <sub>3</sub> , 25 °C, 125.813 MHz MHz) of <b>3b</b> .                                                                                                                                                                                          | 56 |
| Figure S43. | <sup>13</sup> C{ <sup>1</sup> H} NMR spectrum (CDCl <sub>3</sub> , 25 °C, 125.813 MHz MHz) of <b>3c</b> .                                                                                                                                                                                          | 57 |
| Figure S44. | <sup>13</sup> C{ <sup>1</sup> H} NMR spectrum (CDCl <sub>3</sub> , 25 °C, 125.813 MHz MHz) of <b>3d</b> .                                                                                                                                                                                          | 57 |
| Figure S45. | <sup>13</sup> C{ <sup>1</sup> H} NMR spectrum (CDCl <sub>3</sub> , 25 °C, 125.813 MHz MHz) of <b>3e</b> .                                                                                                                                                                                          | 58 |
| Figure S46. | <sup>13</sup> C{ <sup>1</sup> H} NMR spectrum (CDCl <sub>3</sub> , 25 °C, 125.813 MHz MHz) of <b>3f</b> .                                                                                                                                                                                          | 58 |
| Figure S47. | <sup>13</sup> C{ <sup>1</sup> H} NMR spectrum (CDCl <sub>3</sub> , 25 °C, 125.813 MHz MHz) of <b>3g</b> .                                                                                                                                                                                          | 59 |
| Figure S48. | <sup>13</sup> C{ <sup>1</sup> H} NMR spectrum (CDCl <sub>3</sub> , 25 °C, 125.813 MHz MHz) of <b>3h</b> .                                                                                                                                                                                          | 59 |
| Figure S49. | <sup>13</sup> C{ <sup>1</sup> H} NMR spectrum (CDCl <sub>3</sub> , 25 °C, 125.813 MHz MHz) of <b>3i</b> .                                                                                                                                                                                          | 60 |
| Figure S50. | <sup>13</sup> C{ <sup>1</sup> H} NMR spectrum (CDCl <sub>3</sub> , 25 °C, 125.813 MHz MHz) of <b>3j</b> .                                                                                                                                                                                          | 60 |
| Figure S51. | <sup>13</sup> C{ <sup>1</sup> H} NMR spectrum (CDCl <sub>3</sub> , 25 °C, 125.813 MHz MHz) of <b>4a</b> .                                                                                                                                                                                          | 61 |
| Figure S52. | <sup>13</sup> C{ <sup>1</sup> H} NMR spectrum (CDCl <sub>3</sub> , 25 °C, 125.813 MHz MHz) of <b>4b</b> .                                                                                                                                                                                          | 61 |
| Figure S53. | <sup>13</sup> C{ <sup>1</sup> H} NMR spectrum (CDCl <sub>3</sub> , 25 °C, 125.813 MHz MHz) of <b>4c</b> .                                                                                                                                                                                          | 62 |
| Figure S54. | <sup>13</sup> C{ <sup>1</sup> H} NMR spectrum (CDCl <sub>3</sub> , 25 °C, 125.813 MHz MHz) of <b>4d</b> .                                                                                                                                                                                          | 62 |
| Figure S55. | <sup>13</sup> C{ <sup>1</sup> H} NMR spectrum (CDCl <sub>3</sub> , 25 °C, 125.813 MHz MHz) of <b>4e</b> .                                                                                                                                                                                          | 63 |
| Figure S56. | <sup>13</sup> C{ <sup>1</sup> H} NMR spectrum (CDCl <sub>3</sub> , 25 °C, 125.813 MHz MHz) of <b>4f</b> .                                                                                                                                                                                          | 63 |
| Figure S57. | <sup>13</sup> C{ <sup>1</sup> H} NMR spectrum (CDCl <sub>3</sub> , 25 °C, 125.813 MHz MHz) of <b>4g</b> .                                                                                                                                                                                          | 64 |
| Figure S58. | <sup>13</sup> C{ <sup>1</sup> H} NMR spectrum (CDCl <sub>3</sub> , 25 °C, 125.813 MHz MHz) of <b>4h</b> .                                                                                                                                                                                          | 64 |
| Figure S59. | <sup>13</sup> C{ <sup>1</sup> H} NMR spectrum (CDCl <sub>3</sub> , 25 °C, 125.813 MHz MHz) of <b>4i</b> .                                                                                                                                                                                          | 65 |
| Figure S60. | <sup>13</sup> C{ <sup>1</sup> H} NMR spectrum (CDCl <sub>3</sub> , 25 °C, 125.813 MHz MHz) of <b>4j</b> .                                                                                                                                                                                          | 65 |
| Figure S61. | HR-ESI-MS (positive ion mode) spectrum of <b>3j</b> .                                                                                                                                                                                                                                              | 66 |
| Figure S62. | HR-ESI-MS (positive ion mode) spectrum of <b>4a</b> .                                                                                                                                                                                                                                              | 66 |
| Figure S63. | HR-ESI-MS (positive ion mode) spectrum of <b>4b</b> .                                                                                                                                                                                                                                              | 66 |
| Figure S64. | HR-ESI-MS (positive ion mode) spectrum of <b>4c</b> .                                                                                                                                                                                                                                              | 67 |
| Figure S65. | HR-ESI-MS (positive ion mode) spectrum of <b>4d</b> .                                                                                                                                                                                                                                              | 67 |
| Figure S66. | HR-ESI-MS (positive ion mode) spectrum of <b>4e</b> .                                                                                                                                                                                                                                              | 67 |
| Figure S67. | HR-ESI-MS (positive ion mode) spectrum of <b>4f</b> .                                                                                                                                                                                                                                              | 68 |
| Figure S68. | HR-ESI-MS (positive ion mode) spectrum of <b>4g</b> .                                                                                                                                                                                                                                              | 68 |
| Figure S69. | HR-ESI-MS (positive ion mode) spectrum of <b>4h</b> .                                                                                                                                                                                                                                              | 68 |
| Figure S70. | HR-ESI-MS (positive ion mode) spectrum of <b>4i</b> .                                                                                                                                                                                                                                              | 69 |
| Figure S71. | HR-ESI-MS (positive ion mode) spectrum of <b>4j</b> .                                                                                                                                                                                                                                              | 69 |
| Figure S72. | Illustration of C–H···π contacts in <b>4c</b> .                                                                                                                                                                                                                                                    | 70 |
| Figure S73. | (a) Hirshfeld surface of <b>4c</b> mapped with dnorm in the range 0.0179 to -1.3052 a.u. (b) Hirshfeld surface of <b>4c</b> mapped with Shape Index in the range -1 to 1 a.u. (c) Hirshfeld surfaces with curvedness of <b>4c</b> . (d) Hirshfeld surfaces with Fragment patch of <b>4c</b> .      | 71 |
| Figure S74. | Full 2-D fingerprint plot for <b>4c</b>                                                                                                                                                                                                                                                            | 72 |
| Figure S75. | Hirshfeld surface contacts in <b>4c</b> .                                                                                                                                                                                                                                                          | 73 |
| Figure S76. | Intermolecular interaction topology network between neighbouring molecules within each molecular crystal structure                                                                                                                                                                                 | 74 |
| Figure S77. | (a) Dispersion intermolecular interaction topology energy framework between neighbouring molecules. (b) Total intermolecular interaction topology energy framework between neighboring molecules. (c) Total intermolecular interaction (annotated) energy framework between neighboring molecules. | 75 |
| Figure S78. | The isosurface densities of the frontier orbitals: LUMO+1, LUMO, HOMO, HOMO-1 of compound <b>4a</b> (isosurface value 0.06).                                                                                                                                                                       | 76 |
| Figure S79. | The isosurface densities of the frontier orbitals: LUMO+1, LUMO, HOMO, HOMO-1 of                                                                                                                                                                                                                   | 76 |

|                     |                                                                                                                                                   |    |
|---------------------|---------------------------------------------------------------------------------------------------------------------------------------------------|----|
|                     | compound <b>4b</b> (isosurface value 0.06).                                                                                                       |    |
| <b>Figure S80.</b>  | The isosurface densities of the frontier orbitals: LUMO+1, LUMO, HOMO, HOMO-1 of compound <b>4c</b> (isosurface value 0.06).                      | 76 |
| <b>Figure S81.</b>  | The isosurface densities of the frontier orbitals: LUMO+1, LUMO, HOMO, HOMO-1 of compound <b>4d</b> (isosurface value 0.06).                      | 76 |
| <b>Figure S82.</b>  | The isosurface densities of the frontier orbitals: LUMO+1, LUMO, HOMO, HOMO-1 of compound <b>4e</b> (isosurface value 0.06).                      | 77 |
| <b>Figure S83.</b>  | The isosurface densities of the frontier orbitals: LUMO+1, LUMO, HOMO, HOMO-1 of compound <b>4f</b> (isosurface value 0.06).                      | 77 |
| <b>Figure S84.</b>  | The isosurface densities of the frontier orbitals: LUMO+1, LUMO, HOMO, HOMO-1 of compound <b>4g</b> (isosurface value 0.06).                      | 77 |
| <b>Figure S85.</b>  | The isosurface densities of the frontier orbitals: LUMO+1, LUMO, HOMO, HOMO-1 of compound <b>4h</b> (isosurface value 0.06).                      | 77 |
| <b>Figure S86.</b>  | The isosurface densities of the frontier orbitals: LUMO+1, LUMO, HOMO, HOMO-1 of compound <b>4i</b> (isosurface value 0.06).                      | 78 |
| <b>Figure S87.</b>  | The isosurface densities of the frontier orbitals: LUMO+1, LUMO, HOMO, HOMO-1 of compound <b>4j</b> (isosurface value 0.06).                      | 78 |
| <b>Figure S88.</b>  | Electronic absorption spectra (CHCl <sub>3</sub> , ambient temperature) of <b>2a</b> , <b>3a</b> and <b>4a</b> .                                  | 79 |
| <b>Figure S89.</b>  | Electronic absorption spectra (CHCl <sub>3</sub> , ambient temperature) of <b>2b</b> , <b>3b</b> and <b>4b</b> .                                  | 79 |
| <b>Figure S90.</b>  | Electronic absorption spectra (CHCl <sub>3</sub> , ambient temperature) of <b>2c</b> , <b>3c</b> and <b>4c</b> .                                  | 80 |
| <b>Figure S91.</b>  | Electronic absorption spectra (CHCl <sub>3</sub> , ambient temperature) of <b>2d</b> , <b>3d</b> and <b>4d</b> .                                  | 80 |
| <b>Figure S92.</b>  | Electronic absorption spectra (CHCl <sub>3</sub> , ambient temperature) of <b>2e</b> , <b>3e</b> and <b>4e</b> .                                  | 81 |
| <b>Figure S93.</b>  | Electronic absorption spectra (CHCl <sub>3</sub> , ambient temperature) of <b>2f</b> , <b>3f</b> and <b>4f</b> .                                  | 81 |
| <b>Figure S94.</b>  | Electronic absorption spectra (CHCl <sub>3</sub> , ambient temperature) of <b>2g</b> , <b>3g</b> and <b>4g</b> .                                  | 82 |
| <b>Figure S95.</b>  | Electronic absorption spectra (CHCl <sub>3</sub> , ambient temperature) of <b>2h</b> , <b>3h</b> and <b>4h</b> .                                  | 82 |
| <b>Figure S96.</b>  | Electronic absorption spectra (CHCl <sub>3</sub> , ambient temperature) of <b>2i</b> , <b>3i</b> and <b>4i</b> .                                  | 83 |
| <b>Figure S97.</b>  | Electronic absorption spectra (CHCl <sub>3</sub> , ambient temperature) of <b>2j</b> , <b>3j</b> and <b>4j</b> .                                  | 83 |
| <b>Figure S98.</b>  | Electronic absorption spectra (CHCl <sub>3</sub> , ambient temperature) of <b>3a-j</b> .                                                          | 84 |
| <b>Figure S99.</b>  | Electronic absorption spectra (CHCl <sub>3</sub> , ambient temperature) of <b>4a-j</b> .                                                          | 85 |
| <b>Figure S100.</b> | TGA thermogram for compound <b>4a</b> .                                                                                                           | 86 |
| <b>Figure S101.</b> | TGA thermogram for compound <b>4b</b> .                                                                                                           | 86 |
| <b>Figure S102.</b> | TGA thermogram for compound <b>4c</b> .                                                                                                           | 87 |
| <b>Figure S103.</b> | TGA thermogram for compound <b>4d</b> .                                                                                                           | 87 |
| <b>Figure S104.</b> | TGA thermograms for compound <b>4e</b> .                                                                                                          | 88 |
| <b>Figure S105.</b> | TGA thermograms for compound <b>4f</b> .                                                                                                          | 88 |
| <b>Figure S106.</b> | TGA thermograms for compound <b>4g</b> .                                                                                                          | 89 |
| <b>Figure S107.</b> | TGA thermograms for compound <b>4h</b> .                                                                                                          | 89 |
| <b>Figure S108.</b> | TGA thermograms for compound <b>4i</b> .                                                                                                          | 90 |
| <b>Figure S109.</b> | TGA thermograms for compound <b>4j</b> .                                                                                                          | 90 |
| <b>Figure S110.</b> | UV-Vis absorption spectra of the most active Pd(II) complex <b>4i</b> recorded in media at 25 °C.                                                 | 91 |
| <b>Figure S111.</b> | Monitoring the stability of complex <b>4i</b> in aqueous solution (3% DMSO) with HPLC. (a) Chromatograms at 350 nm. (b) Relative integral values. | 91 |
| <b>Figure S112.</b> | Ligand-protein interaction diagrams for the best- and worst-docked methyl- and chloride-substituted Pd(II) complexes on PIK3CA-E545K protein      | 92 |
| <b>Figure S113.</b> | Ligand-protein interaction diagrams for the best- and worst-docked methyl- and chloride-substituted Pd(II) complexes on ERBB4-Y1242C protein      | 93 |
| <b>Figure S114.</b> | Ligand-protein interaction diagrams for the best- and worst-docked methyl- and chloride-substituted Pd(II) complexes on KRAS-G13D protein         | 94 |
| <b>Figure S115.</b> | Ligand-protein interaction diagrams for the best- and worst-docked methyl- and chloride-substituted Pd(II) complexes on PIK3CA-H1047R protein     | 95 |
| <b>Figure S116.</b> | Ligand-protein interaction diagrams for the best- and worst-docked methyl- and chloride-substituted Pd(II) complexes on ATM-A112V protein         | 96 |
|                     | References                                                                                                                                        | 97 |

## 1. Experimental

### 1.1. Materials and Methods

Generally, all reactions were carried out under aerobic conditions. The respective substituted-anilines, palladium (II) chloride, potassium *tert*-butoxide, *p*-toluenesulfonic acid and solvents used within the studies were purchased from commercial suppliers and were used as received.  $[\text{PdCl}_2(\text{NCCH}_3)_2]$  and  $\beta$ -ketiminate ((methyl-substituted anilino)pent-3-en-2-one) ligands (**3a–j**) (**Scheme 1**), were synthesized according to literature procedures <sup>1–8</sup>. Compounds **4a–c** were prepared according to modified literature procedures. <sup>9,10</sup>

### 1.2. Instruments

Infrared spectra were collected using a Thermo Nicolet NEXUS 670 FT-IR spectrometer. NMR spectra were recorded using a BrukerAvance III 500 FT-NMR spectrometer (<sup>1</sup>H at 500.303 MHz, <sup>13</sup>C at 125.813 MHz) at ambient temperature. Chemical shifts ( $\delta$ ) are reported in parts per million (ppm) relative to tetramethylsilane using the solvent as internal reference ( $\text{CDCl}_3$ : <sup>1</sup>H NMR  $\delta = 7.26$  ppm; <sup>13</sup>C{<sup>1</sup>H} NMR  $\delta = 77.16$  ppm). Coupling constants ( $J$ ) are reported in Hertz (Hz) and integrations are reported in number of protons. The following abbreviations are used to describe peak patterns: s = single, d = doublet, dd = doublet of doublets, t = triplet, m = multiplet. The melting points were determined using an AELAB UK melting point apparatus. Microanalysis was performed using a Thermo FLASH EA 1112 Series instrument. High resolution mass spectra were recorded with a Bruker micrOTOF QII with an Apollo II ESI source. Thermogravimetric analyses were performed on a NETZSCH STA 409 PG/PC. UV-Vis absorption bands were measured by using UV-Vis double beam spectrophotometer model UV 1900i (SHIMAZDU). HPLC analyses were carried out utilizing a Dionex Summit HPLC system composed from P680 gradient pump, ASI-100 autosampler, TCC-100 column oven and ultimate 3000 VWD-3400RS detector that provided by Thermo Fisher Scientific. The results obtained using licensed chromeleon software version 6.8.

### 1.3. Computational Method

All calculations were performed using ORCA code version 4.2.0. <sup>11</sup> Full geometry optimizations of the ligands **3a–i** and complexes **4a–i** were carried out using the hybrid GGA functional PBE0, <sup>12</sup> and the Ahlrichs triple-zeta def2-TZVP basis set. <sup>13</sup> The impact of the

chloroform solvent was taken into account in all geometry optimizations and excited state calculations for both ligands and complexes using the conductor-like polarizable continuum model (CPCM).<sup>14,15</sup> The lowest 20 singlet-singlet vertical electronic excitations based on PBE0 optimized geometries were computed using the Time-Dependent Density Functional Theory (TD-DFT)<sup>16</sup> formalism in chloroform solvent applying the CPCM solvation model using the hybrid Coulomb-Attenuating Method B3LYP (CAM-B3LYP) functional<sup>17</sup> and the def2-TZVP basis set. Gabedit program<sup>18</sup> was used to compute and draw the isosurface densities of the molecular orbitals.

#### 1.4. Crystallography

Single crystals suitable for X-ray structure determination of compound **4c** were obtained by slow evaporation of a chloroform solution containing **4c** at ambient temperature. Crystallographic data for **4c** are summarized in **Table S5**. Data for compound **4c** were collected with graphite-monochromated Cu K $\alpha$  radiation ( $\lambda = 1.54184 \text{ \AA}$ ) at 100 K with an Oxford Rigaku diffractometer. Data were acquired and processed to give hkl files using CrysAlisPro software. The molecular structures were solved by direct methods using SHELXS-18/3<sup>19</sup> and refined by full-matrix least-squares procedures on  $F^2$  using SHELXL-18/3<sup>20-22</sup>. All non-hydrogen atoms were refined anisotropically and a riding model was employed in the treatment of the hydrogen atom positions.

#### 1.5. Hirshfeld Surfaces

Hirshfeld surfaces of compound **4c** and their associated 2D fingerprint plots were generated using CrystalExplorer17.5 program<sup>23,24</sup> and were analyzed to identify the most relevant intermolecular interactions. The Hirshfeld surfaces were mapped over the normalized contact distance ( $d_{\text{norm}}$ ), which is defined in terms of  $d_e$ ,  $d_i$ , and the vdW radii of the atoms, where  $d_e$  and  $d_i$  are the distances from a point on the surface to the nearest atom outside and inside, respectively. The Hirshfeld surface colors are used to visualize the inter-atomic contacts as: longer than vdW contacts (blue), equal to vdW (white), and shorter than vdW (red). The colors of the points on the 2-D fingerprint plots correspond to the frequency of the  $d_e$  and  $d_i$  combinations on the Hirshfeld surface, where red represents larger fraction or contribution and green to blue represent moderate to small contributions, respectively.<sup>25</sup>

## 1.6. Cytotoxicity assay

Cancer cell lines were obtained from the ATCC (Manassas, VA), MCF7 human breast cancer cell line (ATCC® HTB-22™, USA), HCT-116 colon cancer cell line (ATCC CCL-247™, USA) and human skin fibroblast (ATCC® PCS-201-012™). The cells were cultivated in DMEM-F12 supplemented with glutamine, 1% penicillin-streptomycin and 10% (V/V) fetal bovine serum. To achieve 80–90% confluency the cells were cultivated as a monolayer in a T-75 flask at 37°C 5% CO<sub>2</sub> and high humidity. Trypsin-EDTA solution (0.25%) was used to subculture the cells. In order to find the IC<sub>50</sub> of the synthesized compounds on cancer cell lines, the anti-proliferative activity of the compounds was assessed using the Tetrazolium colorimetric assay (MTT). After being plated into 96-well plates cancer cells were given overnight incubation period. Different concentrations of compounds were added to the cells and incubated for 72 hours. After replacing the medium with 100 μL of fresh medium, 100 μL of freshly filtered MTT (3-(4,5-dimethylthiazol-2-yl)-2,5-diphenyltetrazolium bromide) was added at a concentration of 0.5 mg/ml. Following that, the mixture was incubated for four hours. After adding DMSO to dissolve the insoluble purple formazan product, the optical density (OD) was measured using a spectrophotometer at 750 nm. Subsequently cell viability was calculated using equation 1:

$$\text{Cell Viability} = \frac{\text{optical density of sample} - \text{optical density of blank}}{\text{optical density of control} - \text{optical density of blank}} \times 100\% \quad (1)$$

## 1.7. Stability Monitored by UV–Visible Spectroscopy

The stability of the stock solution of **4i** was evaluated in DMSO and aqueous media using UV–visible spectroscopy over a wavelength range of 260–800 nm with a 1 cm path length cuvette. The initial sample was divided into two equal portions for the stability study; one portion was exposed to diffuse light and monitored over time. The samples were prepared by diluting a 5 mM stock solution of the respective complex in DMSO with the medium to obtain a final concentration of 10<sup>-6</sup> M. The UV–Vis spectra of the resulting solutions were recorded periodically for up to 72 h.

## 1.8. HPLC Methods and Sample Preparation

Ligand and complex **4i** solutions were freshly prepared as described in the previous work in Quiroga et al <sup>26,27</sup> for UV–Vis stability assay. Prior to injection into the column, 20 μL of the

sample was withdrawn at different time points ( $t = 0$  and  $72$  h) and diluted with  $180 \mu\text{L}$  of HPLC-grade acetonitrile. Subsequently,  $20 \mu\text{L}$  of the diluted solution was injected into a Zorbax Eclipse XDB-C18 column ( $4.6 \times 150$  mm,  $5 \mu\text{m}$ ). The chromatographic conditions were as follows: flow rate of  $1$  mL/min, UV detection at  $350$  nm, and a mobile phase consisting of acetonitrile/water ( $95:5$ , v/v). The analysis was monitored for a total run time of  $12$  min.

## 1.9. Molecular Docking

The structure of the Pd(II) complexes were obtained from our computational method study. Because the anticancer activities of the novel Pd(II) complexes were evaluated against MCF-7 (breast cancer) and HCT-116 (colon cancer) cell lines, the top 20 genes in both breast and colon cancers were investigated using the Catalogue Of Somatic Mutations In Cancer (COSMIC).<sup>28</sup> In the MCF-7 cell line, only two genes from the top 20 genes in breast cancer have somatic mutations and representative crystal structures: the PIK3CA protein harbors the E545K mutation and the ERBB4 protein contains the Y1242C mutation. In contrast, in HCT-116 cell line, only three genes from the top 20 genes in colon cancer have a somatic mutation and representative crystal structures; that is, the KRAS protein exhibits the G13D mutation, the PIK3CA protein harbors the H1047R mutation, and the ATM protein contains the A112V mutation. Consequently, five proteins were used in molecular docking studies; that is, PIK3CA-E545K with PDB entry (8GUD),<sup>29</sup> ERBB4-Y1242C with PDB entry (2R4B),<sup>30</sup> KRAS-G13D with PDB entry (8UN5),<sup>31</sup> PIK3CA-H1047R with PDB entry (8TGD),<sup>32</sup> and ATM-A112V with PDB entry (7NI5).<sup>33</sup>

To predict potential binding sites on the target proteins, P2Rank (version 2.5),<sup>34,35</sup> a tool designed to analyze protein structure and sequence for the identification of likely binding regions, was employed. The molecular docking of the Pd(II) complexes was performed using AutoDock Vina (version 1.2.7)<sup>36,37</sup>, a widely utilized docking tool. Open babel<sup>38</sup> was used to assign partial atomic charges before using AutoDock Vina. The palladium ion was assigned Universal Force Field (UFF) parameters.<sup>39</sup> Partial charges were assigned to the protein atoms using the Gasteiger-Marsili sigma method, while the palladium complexes were assigned partial charges using the Electronegativity Equalization Method (EEM). The docking process was carried out with a grid box size of  $25 \times 25 \times 25 \text{ \AA}^3$  surrounding the protein binding site. To enhance the accuracy and thoroughness of the docking process, the exhaustiveness parameter was set to 24, and the number of modes to 100. The grid box center for each protein in  $x$ ,  $y$ , and  $z$  directions, respectively were

as following: PIK3CA-E545K (124.4906, 137.8921, 153.6301 Å), ERBB4-Y1242C (-13.5465, 17.0451, -2.7001 Å), KRAS-G13D (10.4143, -8.3606, -6.705 Å), PIK3CA-H1047R (34.8644, -21.8444, 81.0607 Å), and ATM-A112V (112.9832, 155.4942, 215.1651 Å).

Limitations and ligand speciation: Docking was performed using the intact, neutral Pd(II) complexes as model ligands. This choice represents a simplification: Pd(II) centers are known to be kinetically labile and may undergo aquation or ligand exchange under physiological conditions, potentially yielding distinct species with different protein affinities. The present docking therefore models the intact complexes as a structural hypothesis and does not account for possible hydrolysed or exchanged forms. Future work will be required to address speciation experimentally.

Following docking, the interactions between the compounds and the target protein were analyzed using LigPlot+ (version 2.2).<sup>40,41</sup> This tool was used to create 2D diagrams of the ligand-protein interactions, which facilitated the examination of the binding modes and interaction patterns of the docked compounds. ChimeraX<sup>42-44</sup> was used for visualizing biomolecular structures, generating publication-quality images, studying protein-ligand interactions, examining molecular surfaces, assessing electrostatic potentials, and analyzing trajectories.

## 1.10. General procedure for preparation of 3j

A catalytic amount of *p*-toluenesulfonic acid was added in a single portion to a solution of 4-Chloro-2-methylaniline (**2j**) (20.00 mmol) and 2, 4-pentanedione (**1**) (20.00 mmol) in 100 mL of toluene. The reaction solution was refluxed for 24 h with water removed using a Dean–Stark trap. The reaction mixture was evaporated to dryness under reduced pressure and the obtained residue was dissolved in diethyl ether (10 mL). The reaction mixture was extracted with water (10 mL). The combined organic phases were dried over MgSO<sub>4</sub>. All the volatiles were removed in *vacuo* and the residue was recrystallized from ethanol at –18 °C temperature to afford **3j** as a white solid.

### 1.10.1. [4-(4-chloro-2-methylphenyl)amino-3-penten-2-one] (**3j**)

Yield: 4.823 g (14.5 mmol, 72% based on **1**). M. p.: 71 °C. IR (KBr, cm<sup>-1</sup>):  $\nu$  3414 (s), 3049 (m), 1611 (s), 1559 (s), 1507 (s), 1477 (s), 1433 (m), 1382 (s), 1274 (s), 1174 (s), 1122 (s), 1021 (m), 993 (m), 922 (m), 868 (m), 846 (m), 825 (m), 757 (m), 624. <sup>1</sup>H NMR (500 MHz, CDCl<sub>3</sub>):  $\delta$  = 12.25 (s, 1H, NH), 7.21 (s, 1H, Ph), 7.14 (d,  $J_{\text{HH}} = 8.4$  Hz, 1H, Ph), 6.99 (d,  $J_{\text{HH}} = 8.3$  Hz, 1H, Ph), 5.20 (s, 1H, CH NAcAc backbone), 2.24 (s, 3H, CH<sub>3</sub>), 2.09 (s, 3H, CH<sub>3</sub>), 1.84 (s, 3H, CH<sub>3</sub>) ppm. <sup>13</sup>C {<sup>1</sup>H} NMR (125 MHz, CDCl<sub>3</sub>):  $\delta$  = 196.5 (CO), 160.8 (N-C=), 136.2 (*ipso*-CPh), 135.6 (*ipso*-CPh), 131.7 (*ipso*-CPh), 130.7 (CH, Ph), 127.4 (CH, Ph), 126.5 (CH, Ph), 97.6 (CH NAcAc backbone), 29.2 (CH<sub>3</sub> NAcAc backbone), 19.7 (CH<sub>3</sub> NAcAc backbone) ppm, 18.1 (CH<sub>3</sub>-Ph). UV <sub>$\lambda_{\text{max}}$</sub>  (CHCl<sub>3</sub>) = 309 nm,  $\epsilon$  = 17314 Lmol<sup>-1</sup>cm<sup>-1</sup>. HR-ESI-MS (positive ion mode) *m/z*: Calcd. For C<sub>12</sub>H<sub>15</sub>ClNO (M+H) 224.08367 found 224.08352.

## 1.11. General procedure for the preparation of 4a–j

KO<sup>t</sup>Bu (173 mg, 1.54 mmol) was added in a single portion to a solution of the respective enamionone ligands **3a–j** (1.54 mmol) in 35 mL of methanol. The formed reaction mixture was stirred at ambient temperature for 1 h and then [PdCl<sub>2</sub>(NCCCH<sub>3</sub>)<sub>2</sub>] (200 mg, 0.77 mmol) was added in one portion at ambient temperature. The resulting reaction mixture was stirred at ambient temperature for 3 days. The solids formed of **4a–j** were filtered through a filter paper and washed with methanol (4 × 25 mL). The obtained yellow solids were dried under high vacuum.

### 1.11.1. Bis(4-((2-methylphenyl)amino)pent-3-en-2-one)palladium(II) complex (**4a**)<sup>9,10</sup>

Yield: 0.306 g (0.634 mmol, 82% based on **2a**). M. p.: 192 °C. IR (KBr, cm<sup>-1</sup>):  $\nu$  2918 (m), 1616 (m), 1578 (s), 1544 (s), 1510 (s), 1484 (s), 1403 (s), 1273 (m), 1244 (m), 1188 (m), 1113 (m), 1022

(m), 947 (m), 875 (m), 766 (m), 620 (m) and 453 (m).  $^1\text{H}$  NMR (500 MHz,  $\text{CDCl}_3$ ):  $\delta$  = 7.12 (t,  $J_{\text{HH}} = 7.5$ , 2H, Ph), 7.06 (d,  $J_{\text{HH}} = 7.1$ , 1H, Ph), 6.91 (t,  $J_{\text{HH}} = 7.5$  Hz, 1H, Ph), 4.85 (s, 1H, CH nacac backbone), 2.26 (s, 3H,  $\text{CH}_3$ ), 1.59 (s, 3H,  $\text{CH}_3$ ), 1.37 (s, 3H,  $\text{CH}_3$ ) ppm.  $^{13}\text{C}\{^1\text{H}\}$  NMR (125 MHz,  $\text{CDCl}_3$ ):  $\delta$  = 176.4 (C=O), 162.6 (N-C=), 147.6 (*ipso*-Cph-N), 133.3 (*ipso*-Cph), 129.5 (CH, Ph), 125.8 (CH, Ph), 125.7 (CH, Ph), 124.9 (CH, Ph), 97.7 (CH NAcAc backbone), 23.5 ( $\text{CH}_3$ ), 23.4 ( $\text{CH}_3$ ), 18.7 ( $\text{CH}_3$ ) ppm.  $\text{UV}_{\lambda_{\text{max}}}(\text{CHCl}_3) = 339$  nm,  $\epsilon = 10265$   $\text{Lmol}^{-1}\text{cm}^{-1}$ , 400 nm,  $\epsilon = 1905$   $\text{Lmol}^{-1}\text{cm}^{-1}$ . HR-ESI-MS (positive ion mode)  $m/z$ : Calcd. For  $\text{C}_{24}\text{H}_{29}\text{N}_2\text{O}_2\text{Pd}$  (M+H) 483.12584 found 483.12391.

#### 1.11.2. Bis(4-((3-methylphenyl)amino)pent-3-en-2-one)palladium(II) complex (4b)<sup>9,10</sup>

Yield: 0.336 g (0.696 mmol, 90% based on **2b**). M. p.: 174 °C. IR (KBr,  $\text{cm}^{-1}$ ):  $\nu$  2917 (m), 1585 (s), 1508 (s), 1405 (s), 1271 (m), 1210 (m), 1161 (m), 1024 (m), 944 (m), 878 (w), 760 (m), 620 (m) and 476 (m).  $^1\text{H}$  NMR (500 MHz,  $\text{CDCl}_3$ ):  $\delta$  = 7.13 (t,  $J_{\text{HH}} = 7.6$  Hz, 1H, Ph), 6.94 (d,  $J_{\text{HH}} = 7.6$  Hz, 1H, Ph), 6.79 (s, 1H, Ph), 6.76 (d,  $J_{\text{HH}} = 7.8$  Hz, 1H, Ph), 4.83 (s, 1H, CH NAcAc backbone), 2.33 (s, 3H,  $\text{CH}_3$ ), 1.66 (s, 3H,  $\text{CH}_3$ ), 1.39 (s, 3H,  $\text{CH}_3$ ) ppm.  $^{13}\text{C}\{^1\text{H}\}$  NMR (125 MHz,  $\text{CDCl}_3$ ):  $\delta$  = 176.1 (C=O), 162.8 (N-C=), 148.6 (*ipso*-Cph-N), 137.5 (*ipso*-Cph), 127.7 (CH, Ph), 126.8 (CH, Ph), 125.4 (CH, Ph), 123.1 (CH, Ph), 97.9 (CH NAcAc backbone), 23.9 ( $\text{CH}_3$ ), 23.7 ( $\text{CH}_3$ ), 21.4 ( $\text{CH}_3$ ) ppm.  $\text{UV}_{\lambda_{\text{max}}}(\text{CHCl}_3) = 341$  nm,  $\epsilon = 12263$   $\text{Lmol}^{-1}\text{cm}^{-1}$ , 420 nm,  $\epsilon = 1087$   $\text{Lmol}^{-1}\text{cm}^{-1}$ . HR-ESI-MS (positive ion mode)  $m/z$ : Calcd. For  $\text{C}_{24}\text{H}_{29}\text{N}_2\text{O}_2\text{Pd}$  (M+H) 483.12584 found 483.12712.

#### 1.11.3. Bis(4-((4-methylphenyl)amino)pent-3-en-2-one)palladium(II) complex (4c)<sup>9,10</sup>

Yield: 0.343 g (0.710 mmol, 92% based on **2c**). M. p.: 214 °C. IR (KBr,  $\text{cm}^{-1}$ ):  $\nu$  2915 (m), 1617 (m), 1576 (s), 1513 (s), 1503 (s), 1400 (s), 1275 (m), 1203 (m), 1105 (m), 1016 (m), 947 (m), 873 (m), 756 (m), 625 (m) and 467 (m).  $^1\text{H}$  NMR (500 MHz,  $\text{CDCl}_3$ ):  $\delta$  = 7.7 (d,  $J_{\text{HH}} = 12.0$  Hz, 2H, Ph), 6.85 (d,  $J_{\text{HH}} = 7.7$  Hz, 2H, Ph), 4.83 (s, 1H, CH NAcAc backbone), 2.31 (s, 3H,  $\text{CH}_3$ ), 1.66 (s, 3H,  $\text{CH}_3$ ), 1.40 (s, 3H,  $\text{CH}_3$ ) ppm.  $^{13}\text{C}\{^1\text{H}\}$  NMR (125 MHz,  $\text{CDCl}_3$ ):  $\delta$  = 176.2 (C=O), 162.9 (N-C=), 146.1 (*ipso*-Cph-N), 134.0 (*ipso*-Cph), 128.5 (CH), 125.9 (CH), 97.9 (CH NAcAc backbone), 23.9 ( $\text{CH}_3$ ), 23.6 ( $\text{CH}_3$ ), 21.1 ( $\text{CH}_3$ ) ppm.  $\text{UV}_{\lambda_{\text{max}}}(\text{CHCl}_3) = 335$  nm,  $\epsilon = 12701$   $\text{Lmol}^{-1}\text{cm}^{-1}$ , 430 nm,  $\epsilon = 615$   $\text{Lmol}^{-1}\text{cm}^{-1}$ . HR-ESI-MS (positive ion mode)  $m/z$ : Calcd. For  $\text{C}_{24}\text{H}_{29}\text{N}_2\text{O}_2\text{Pd}$  (M+H) 483.12584 found 483.12773.

#### 1.11.4. Bis(4-((2,4-dimethylphenyl)amino)pent-3-en-2-one)palladium(II) complex (4d)

Yield: 0.306 g (0.600 mmol, 78% based on **2d**). M. p.: 184 °C. Anal. calcd. For C<sub>26</sub>H<sub>32</sub>N<sub>2</sub>O<sub>2</sub>Pd (510.97): C, 61.12; H, 6.31; N, 5.48. Found; C, 61.20; H, 6.29; N, 5.55. IR (KBr, cm<sup>-1</sup>):  $\nu$  3008 (m), 2963 (m), 2916 (m), 1615 (m), 1576 (s), 1510 (s), 1492 (s), 1405 (s), 1375 (s), 1274 (m), 1228 (m), 1124 (w), 1021 (m), 946 (m), 870 (m), 758 (m), 627 (m) and 478 (m). <sup>1</sup>H NMR (500 MHz, CDCl<sub>3</sub>):  $\delta$  = 6.95-6.92 (m, 2H, Ph), 6.78 (d,  $J_{HH}$  = 7.7 Hz, 1H, Ph), 4.83 (s, 1H, CH NAcAc backbone), 2.27 (s, 3H, CH<sub>3</sub>), 2.21 (s, 3H, CH<sub>3</sub>), 1.59 (s, 3H, CH<sub>3</sub>), 1.40 (s, 3H, CH<sub>3</sub>) ppm. <sup>13</sup>C {<sup>1</sup>H} NMR (125 MHz, CDCl<sub>3</sub>):  $\delta$  = 176.4 (C=O), 162.7 (N-C=), 144.9 (*i*-Cph-CH<sub>3</sub>), 134.2 (*ipso*-Cph-N), 132.8 (CH), 130.2 (*ipso*-Cph), 126.3 (CH), 125.6 (CH), 97.7 (CH NAcAc backbone), 23.6 (CH<sub>3</sub>), 23.4 (CH<sub>3</sub>), 21.1 (CH<sub>3</sub>), 18.6 (CH<sub>3</sub>) ppm. UV <sub>$\lambda$ max</sub> (CHCl<sub>3</sub>) = 337 nm,  $\epsilon$  = 125198 Lmol<sup>-1</sup>cm<sup>-1</sup>, 420 nm,  $\epsilon$  = 802 Lmol<sup>-1</sup>cm<sup>-1</sup>. HR-ESI-MS positive ion mode) m/z: Calcd. For C<sub>26</sub>H<sub>33</sub>N<sub>2</sub>O<sub>2</sub>Pd (M+H) 511.15714 found 511.15588.

#### 1.11.5. Bis(4-((2,6-dimethylphenyl)amino)pent-3-en-2-one)palladium(II) complex (**4e**)

Yield: 0.3048 g (0.596 mmol, 77% based on **2e**). M. p.: 250 °C. Anal. calcd. For C<sub>26</sub>H<sub>32</sub>N<sub>2</sub>O<sub>2</sub>Pd (510.97): C, 61.12; H, 6.31; N, 5.48. Found; C, 61.23; H, 6.37; N, 5.57. IR (KBr, cm<sup>-1</sup>):  $\nu$  3010 (m), 2967 (m), 2916 (m), 1579 (s), 1509 (s), 1468 (s), 1402 (s), 1373 (s), 1275 (m), 1257 (m), 1195 (m), 1090 (m), 1021 (m), 947 (m), 860 (m), 768 (m), 609 (m) and 463 (m). <sup>1</sup>H NMR (500 MHz, CDCl<sub>3</sub>):  $\delta$  = 6.99 (s, 3H, Ph), 4.85 (s, 1H, CH NAcAc backbone), 2.25 (s, 6H, CH<sub>3</sub>), 1.53 (s, 3H, CH<sub>3</sub>), 1.37 (s, 3H, CH<sub>3</sub>) ppm. <sup>13</sup>C {<sup>1</sup>H} NMR (125 MHz, CDCl<sub>3</sub>):  $\delta$  = 176.6 (C=O), 162.2 (N-C=), 146.4 (*ipso*-Cph-N), 132.7 (*ipso*-Cph), 127.3 (CH), 124.7 (CH), 97.5 (CH NAcAc backbone), 23.5 (CH<sub>3</sub>), 22.6 (CH<sub>3</sub>), 18.9 (CH<sub>3</sub>) ppm. UV <sub>$\lambda$ max</sub> (CHCl<sub>3</sub>) = 336 nm,  $\epsilon$  = 12203 Lmol<sup>-1</sup>cm<sup>-1</sup>, 420 nm,  $\epsilon$  = 660 Lmol<sup>-1</sup>cm<sup>-1</sup>. HR-ESI-MS positive ion mode) m/z: Calcd. For C<sub>26</sub>H<sub>33</sub>N<sub>2</sub>O<sub>2</sub>Pd (M+H) 511.15714 found 511.15555.

#### 1.11.6. Bis(4-((3,5-dimethylphenyl)amino)pent-3-en-2-one)palladium(II) complex (**4f**)

Yield: 0.2155 g (0.422 mmol, 72% based on **2f**). M. p.: 174 °C. Anal. calcd. For C<sub>26</sub>H<sub>32</sub>N<sub>2</sub>O<sub>2</sub>Pd (510.97): C, 61.12; H, 6.31; N, 5.48. Found; C, 61.19; H, 6.33; N, 5.46. IR (KBr, cm<sup>-1</sup>):  $\nu$  2915 (m), 1615(s), 1585 (s), 1510 (s), 1408 (s), 1297 (m), 1274 (m), 1223 (m), 1157 (m), 1014 (m), 945 (w), 850 (w), 766 (m), 690 (m), 620 (m) and 472 (m). <sup>1</sup>H NMR (500 MHz, CDCl<sub>3</sub>):  $\delta$  = 6.77 (s, 1H, Ph), 6.58 (s, 2H, Ph), 4.82 (s, 1H, CH NAcAc backbone), 2.29 (s, 6H, CH<sub>3</sub>, Ph), 1.67 (s, 3H, CH<sub>3</sub> NAcAc backbone), 1.41 (s, 3H, CH<sub>3</sub> NAcAc backbone) ppm. <sup>13</sup>C {<sup>1</sup>H} NMR (125 MHz, CDCl<sub>3</sub>):  $\delta$  = 175.9 (C=O), 162.7 (N-C=), 148.4 (*ipso*-CPh-N), 137.2 (*ipso*-CPh), 126.2 (CH, Ph),

123.8 (CH, Ph), 97.9 (CH NAcAc backbone), 23.8 (CH<sub>3</sub> NAcAc backbone), 23.7 (CH<sub>3</sub> NAcAc backbone), 21.4 (CH<sub>3</sub>-Ph) ppm. UV<sub>λmax</sub> (CHCl<sub>3</sub>) = 342 nm, ε = 10297 Lmol<sup>-1</sup>cm<sup>-1</sup>, 427 nm, ε = 864 Lmol<sup>-1</sup>cm<sup>-1</sup>. HR-ESI-MS positive ion mode) m/z: Calcd. For C<sub>26</sub>H<sub>33</sub>N<sub>2</sub>O<sub>2</sub>Pd (M+H) 511.15714 found 511.15553.

#### 1.11.7. Bis(4-((2,4,6-trimethylphenyl)amino)pent-3-en-2-one)palladium(II) complex (4g)

Yield: 0.3221 g (0.598 mmol, 78% based on **2g**). M. p.: 233 °C. Anal. calcd. For C<sub>28</sub>H<sub>36</sub>N<sub>2</sub>O<sub>2</sub>Pd (539.03): C, 62.39; H, 6.73; N, 5.20. Found; C, 62.45; H, 6.63; N, 5.26. IR (KBr, cm<sup>-1</sup>): ν 2994 (m), 2914 (m), 1616 (s), 1577 (s), 1503 (s), 1448 (s), 1401 (s), 1369 (s), 1270 (m), 1234 (m), 1201 (m), 1151 (m), 1021 (m), 945 (m), 858 (m), 761 (m), 624 (m) and 474 (m). <sup>1</sup>H NMR (500 MHz, CDCl<sub>3</sub>): δ = 6.80 (s, 2H, Ph), 4.83 (s, 1H, CH NAcAc backbone), 2.23 (s, 3H, CH<sub>3</sub>), 2.19 (s, 6H, CH<sub>3</sub>), 1.52 (s, 3 H, CH<sub>3</sub>), 1.39 (s, 3H, CH<sub>3</sub>) ppm. <sup>13</sup>C {<sup>1</sup>H} NMR (500 MHz, CDCl<sub>3</sub>): δ = 176.6 (C=O), 162.3 (N-C=), 143.8 (*ipso*-CPh-N), 133.9 (*ipso*-CPh), 132.4 (*ipso*-CPh), 128.0 (CH, Ph), 97.5 (CH NAcAc backbone), 23.5 (CH<sub>3</sub> NAcAc backbone), 22.5 (CH<sub>3</sub> NAcAc backbone), 21.1 (CH<sub>3</sub>-Ph), 18.9 (CH<sub>3</sub>-Ph) ppm. UV<sub>λmax</sub> (CHCl<sub>3</sub>) = 342 nm, ε = 9828 Lmol<sup>-1</sup>cm<sup>-1</sup>, 420 nm, ε = 630 Lmol<sup>-1</sup>cm<sup>-1</sup>. HR-ESI-MS positive ion mode) m/z: Calcd. For C<sub>28</sub>H<sub>37</sub>N<sub>2</sub>O<sub>2</sub>Pd (M+H) 539.18844 found 539.18940.

#### 1.11.8. Bis(4-((3,4-dimethylphenyl)amino)pent-3-en-2-one)palladium(II) complex (4h)

Yield: 0.2538 g (0.496 mmol, 64% based on **2h**). M. p.: 186 °C. Anal. calcd. For C<sub>26</sub>H<sub>32</sub>N<sub>2</sub>O<sub>2</sub>Pd (510.97): C, 61.12; H, 6.31; N, 5.48. Found; 61.21; H, 6.36; N, 5.41. IR (KBr, cm<sup>-1</sup>): ν 2918 (m), 1576 (s), 1510 (s), 1495 (s), 1404 (s), 1272 (m), 1199 (m), 1157 (m), 1000 (m), 949 (m), 876 (w), 756 (m), 646 (m) and 478 (m). <sup>1</sup>H NMR (500 MHz, CDCl<sub>3</sub>): δ = 7.01 (d, *J*<sub>HH</sub> = 7.8 Hz 1H, Ph), 6.74 (s, 1H, Ph), 6.68 (d, *J*<sub>HH</sub> = 7.8 Hz, 1H, Ph), 4.82 (s, 1H, CH NAcAc backbone), 2.24 (s, 3H, CH<sub>3</sub>, Ph), 2.21 (s, 3H, CH<sub>3</sub>, Ph), 1.67 (s, 3H, CH<sub>3</sub> NAcAc backbone), 1.40 (s, 3H, CH<sub>3</sub> NAcAc backbone) ppm. <sup>13</sup>C {<sup>1</sup>H} NMR (500 MHz, CDCl<sub>3</sub>): δ = 176.1 (C=O), 162.8 (N-C=), 146.2 (*ipso*-Cph-N), 135.7 (*ipso*-Cph), 132.6 (CH), 129.0 (*ipso*-Cph), 127.3 (CH), 123.3 (CH), 97.9 (CH NAcAc backbone), 23.9 (CH<sub>3</sub>), 23.7 (CH<sub>3</sub>), 19.9 (CH<sub>3</sub>), 19.4 (CH<sub>3</sub>) ppm. UV<sub>λmax</sub> (CHCl<sub>3</sub>) = 335 nm, ε = 12334 Lmol<sup>-1</sup>cm<sup>-1</sup>, 408 nm, ε = 1598 Lmol<sup>-1</sup>cm<sup>-1</sup>. HR-ESI-MS positive ion mode) m/z: Calcd. For C<sub>26</sub>H<sub>33</sub>N<sub>2</sub>O<sub>2</sub>Pd (M+H) 511.15714 found 511.15782.

#### 1.11.9. Bis(4-((2,5-dimethylphenyl)amino)pent-3-en-2-one)palladium(II) complex (4i)

Yield: 0.283 g (0.553 mmol, 72% based on **2i**). M. p.: 174 °C. Anal. calcd. For C<sub>26</sub>H<sub>32</sub>N<sub>2</sub>O<sub>2</sub>Pd (510.97): C, 61.12; H, 6.31; N, 5.48. Found; C, 61.25; H, 6.35; N, 5.62. IR (KBr, cm<sup>-1</sup>): ν 2948

(m), 2918 (m), 1615 (m), 1577 (s), 1510 (s), 1407 (s), 1275 (m), 1254 (m), 1127 (m), 1027 (m), 948 (m), 801 (m), 773 (m), 619 (m) and 453 (m).  $^1\text{H}$  NMR (500 MHz,  $\text{CDCl}_3$ ):  $\delta$  = 6.99 (d,  $J_{\text{HH}} = 7.6$  Hz, 2H, Ph), 6.87 (d,  $J_{\text{HH}} = 7.7$  Hz, 1H, Ph), 6.71 (s, 1H, Ph), 4.83 (s, 1H, CH NAcAc backbone), 2.30 (s, 3H,  $\text{CH}_3$ ), 2.20 (s, 3H,  $\text{CH}_3$ ), 1.59 (s, 3H,  $\text{CH}_3$ ), 1.39 (s, 3H,  $\text{CH}_3$ ) ppm.  $^{13}\text{C}\{^1\text{H}\}$  NMR (125 MHz,  $\text{CDCl}_3$ ):  $\delta$  = 176.3 (C=O), 162.5 (N-C=), 147.2 (*ipso*-Cph-N), 135.1 (*ipso*-Cph), 130.0 (*ipso*-Cph), 129.3 (*i*-Cph), 126.4 (CH), 125.6 (CH), 97.7 (CH NAcAc backbone), 23.6 ( $\text{CH}_3$ ), 23.4 ( $\text{CH}_3$ ), 21.1 (CH), 18.3 (CH) ppm.  $\text{UV}_{\lambda_{\text{max}}}(\text{CHCl}_3) = 335$  nm,  $\epsilon = 13336$   $\text{Lmol}^{-1}\text{cm}^{-1}$ , 428 nm,  $\epsilon = 741$   $\text{Lmol}^{-1}\text{cm}^{-1}$ . HR-ESI-MS positive ion mode)  $m/z$ : Calcd. For  $\text{C}_{26}\text{H}_{33}\text{N}_2\text{O}_2\text{Pd}$  (M+H) 511.15714 found 511.15810.

**1.11.10. Bis(4-((4-chloro-2-methylphenyl)amino-3-penten-2-one)palladium(II) complex (4j)**

Yield: 0.469 g (0.766 mmol, 91% based on **2j**). M. p.: 207 °C-decomposition. Anal. calcd. For  $\text{C}_{24}\text{H}_{26}\text{Cl}_2\text{N}_2\text{O}_2\text{Pd}$  (551.80): C, 52.24; H, 4.75; N, 5.08. Found; 52.31; H, 4.69; N, 5.12. IR (KBr,  $\text{cm}^{-1}$ ):  $\nu$  2919 (w), 1637 (s), 1617 (vs), 1575 (m), 1508 (s), 1478 (m), 1402 (s), 1271 (w), 1186 (m), 1118 (w), 1089 (w), 1024 (w), 949 (w), 880 (w), 768 (w), 620 (m) and 476 (m).  $^1\text{H}$  NMR (500 MHz,  $\text{CDCl}_3$ ):  $\delta$  = 7.12 (s, 1H, Ph), 7.09 (d,  $J_{\text{HH}} = 7.7$  Hz, 1H, Ph), 6.82 (dd,  $J_{\text{HH}} = 7.7$  Hz, 4.7 Hz, 1H, Ph), 4.86 (s, 1H, CH NAcAc backbone), 2.21 (s, 3H,  $\text{CH}_3$ ), 1.59 (s, 3H,  $\text{CH}_3$ ), 1.41 (s, 3H,  $\text{CH}_3$ ) ppm.  $^{13}\text{C}\{^1\text{H}\}$  NMR (125 MHz,  $\text{CDCl}_3$ ):  $\delta$  = 176.9 (CO), 162.8 (N-C=), 146.0 (*ipso*-CPh), 135.3 (*ipso*-CPh), 130.0 (CH, Ph), 129.3 (*ipso*-CPh), 127.2 (CH, Ph), 125.8 (CH, Ph), 97.9 (CH NAcAc backbone), 23.8 ( $\text{CH}_3$  NAcAc backbone), 23.5 ( $\text{CH}_3$  NAcAc backbone) ppm, 18.6 ( $\text{CH}_3$ -Ph) ppm.  $\text{UV}_{\lambda_{\text{max}}}(\text{CHCl}_3) = 324$  nm,  $\epsilon = 15505$   $\text{Lmol}^{-1}\text{cm}^{-1}$ , 402 nm,  $\epsilon = 640$   $\text{Lmol}^{-1}\text{cm}^{-1}$ . HR-ESI-MS (positive ion mode)  $m/z$ : Calcd. For  $\text{C}_{24}\text{H}_{27}\text{Cl}_2\text{N}_2\text{O}_2\text{Pd}$  (M+H) 552.08032 found 552.04377.

**Table S1.** IR (KBr) data for **3a–j** and **4a–j**.

| Ligand    | $\nu$ (cm <sup>-1</sup> ) |                               | Complex   | $\nu$ (cm <sup>-1</sup> )                           |
|-----------|---------------------------|-------------------------------|-----------|-----------------------------------------------------|
|           | $\nu$ H-N                 | $\nu$ C=C, C=O, C=N           |           | $\nu$ C=C, $\nu$ C=O, $\nu$ C=N                     |
| <b>3a</b> | 3422                      | 1618 (s), 1580 (m), 1506 (m)  | <b>4a</b> | 1578 (s), 1510 (s), 1484 (s)                        |
| <b>3b</b> | 3415                      | 1617 (s), 1576 (m), 1491 (m)  | <b>4b</b> | 1585 (s), 1508 (s), 1405 (s)                        |
| <b>3c</b> | 3417                      | 1609 (s), 1565 (s), 1520 (m)  | <b>4c</b> | 1576 (s), 1513 (s), 1503 (s)                        |
| <b>3d</b> | 3416                      | 1611 (s), 1563 (s), 1512 (m)  | <b>4d</b> | 1576 (s), 1510 (s), 1492 (s)                        |
| <b>3e</b> | 3454                      | 1615 (s), 1552 (s), 1500 (m)  | <b>4e</b> | 1579 (s), 1509 (s), 1468 (s)                        |
| <b>3f</b> | 3419                      | 1612 (s), 1569 (s), 1507 (m)  | <b>4f</b> | 1585 (s), 1510 (s), 1408 (s)                        |
| <b>3g</b> | 3414                      | 1614 (s), 1570 (s), 1481 (m)  | <b>4g</b> | 1577(s), 1503 (s), 1448 (m)                         |
| <b>3h</b> | 3417                      | 1611 (s), 1568 (s), 1508 (m)  | <b>4h</b> | 1576 (s), 1510 (s), 1495 (s)                        |
| <b>3i</b> | 3419                      | 1614 (s), 1575 (m), 1513 (m)  | <b>4i</b> | 1577 (s), 1510 (s), 1407 (s)                        |
| <b>3j</b> | 3414                      | 1611 (s) , 1559 (s), 1507 (m) | <b>4j</b> | 1637 (s), 1617 (vs), 1576(m), 1508(s),<br>1478 (s), |

**Table S2.** NMR ( $^1\text{H}$ ,  $^{13}\text{C}\{^1\text{H}\}$ ) data for **3a–j**.

| ligand    | $^1\text{H}$ NMR ( $\text{CDCl}_3$ )                                                                                                                                                                                                                                                     | $^{13}\text{C}$ NMR ( $\text{CDCl}_3$ )                                                                                                                                                                                                                               |
|-----------|------------------------------------------------------------------------------------------------------------------------------------------------------------------------------------------------------------------------------------------------------------------------------------------|-----------------------------------------------------------------------------------------------------------------------------------------------------------------------------------------------------------------------------------------------------------------------|
|           | $\delta$ (ppm)                                                                                                                                                                                                                                                                           | $\delta$ (ppm)                                                                                                                                                                                                                                                        |
| <b>3a</b> | 12.33 (s, 1H, NH), 7.22 (d, $J_{\text{HH}} = 7.3$ Hz, 1H, CH), 7.15 (dq, $J_{\text{HH}} = 13.7, 6.9$ Hz, 2H, CH), 7.07 (d, $J_{\text{HH}} = 7.6$ Hz, 1H, CH), 5.19 (s, 1H, CH nacac backbone), 2.27 (s, 3H, $\text{CH}_3$ ), 2.09 (s, 3H, $\text{CH}_3$ ), 1.86 (s, 3H, $\text{CH}_3$ ). | 196.1(CO), 161.3 (N-C=), 137.5 ( <i>i</i> -Cph-NH), 133.7 ( <i>i</i> -Cph), 130.8 (CH), 126.5 (CH), 126.4 (CH), 126.3 (CH), 97.1 (CH nacac backbone), 29.1 ( $\text{CH}_3$ ), 19.6 ( $\text{CH}_3$ ), 18.1 ( $\text{CH}_3$ ).                                         |
| <b>3b</b> | 12.45 (s, 1H, NH), 7.19 (t, $J = 7.7$ Hz, 1H, CH), 6.97 (d, $J_{\text{HH}} = 8.2$ Hz, 1H, CH), 6.89 (bs, 1H, CH), 6.88 (bs, 1H, CH), 5.16 (s, 1H, CH nacac backbone), 2.31 (s, 3H, $\text{CH}_3$ ), 2.08 (s, 3H, $\text{CH}_3$ ), 1.96 (s, 3H, $\text{CH}_3$ ).                          | 195.9(CO), 160.3 (N-C=), 139.0 ( <i>i</i> -Cph-NH), 138.5 ( <i>i</i> -Cph), 128.8 (CH), 126.3 (CH), 125.3 (CH), 121.6 (CH), 97.4 (CH nacac backbone), 29.0 ( $\text{CH}_3$ ), 21.2 ( $\text{CH}_3$ ), 19.8 ( $\text{CH}_3$ ).                                         |
| <b>3c</b> | 12.39 (s, 1H, NH), 7.12 (d, $J_{\text{HH}} = 7.9$ Hz, 2H, CH), 6.97 (d, $J_{\text{HH}} = 7.9$ Hz, 2H, CH), 5.15 (s, 1H, CH nacac backbone), 2.32 (s, 3H, $\text{CH}_3$ ), 2.07 (s, 3H, $\text{CH}_3$ ), 1.94 (s, 3H, $\text{CH}_3$ ).                                                    | 195.8(CO), 160.6 (N-C=), 136.0 ( <i>i</i> -Cph-NH), 135.4 ( <i>i</i> -Cph), 129.6 (CH), 124.8 (CH), 97.2 (CH nacac backbone), 29.1 ( $\text{CH}_3$ ), 20.9 ( $\text{CH}_3$ ), 19.7 ( $\text{CH}_3$ ).                                                                 |
| <b>3d</b> | 12.23 (s, 1H, NH), 7.03 (s, 1H, CH), 6.95 (m, 2H, CH), 5.17 (s, 1H, CH nacac backbone), 2.30 (s, 3H, $\text{CH}_3$ -Ph), 2.22 (s, 3H, $\text{CH}_3$ -Ph), 2.09 (s, 3H, $\text{CH}_3$ ), 1.82 (s, 3H, $\text{CH}_3$ ).                                                                    | 195.8(CO), 161.6 (N-C=), 136.3 ( <i>i</i> -Cph), 134.9 ( <i>i</i> -Cph-NH), 133.6 (CH), 131.5 ( <i>i</i> -Cph), 127.0 (CH), 126.3 (CH), 96.7 (CH nacac backbone), 29.1 ( $\text{CH}_3$ ), 20.9 ( $\text{CH}_3$ ), 19.6 ( $\text{CH}_3$ ), 18.0 ( $\text{CH}_3$ ).     |
| <b>3e</b> | 11.92 (s, 1H, NH), 7.10 (m, 3H, CH), 5.20 (s, 1H, CH nacac backbone), 2.19 (s, 6H, $\text{CH}_3$ -Ph), 2.10 (s, 3H, $\text{CH}_3$ ), 1.62 (s, 3H, $\text{CH}_3$ ).                                                                                                                       | 196.1(CO), 163.0 (N-C=), 136.6 ( <i>i</i> -Cph-NH), 136.2 ( <i>i</i> -Cph), 128.3 (CH), 127.5 (CH), 95.9 (CH nacac backbone), 29.1 ( $\text{CH}_3$ ), 18.9 ( $\text{CH}_3$ ), 18.3 ( $\text{CH}_3$ ).                                                                 |
| <b>3f</b> | 12.49 (s, 1H, NH), 6.88 (s, 1H, CH), 6.78 (s, 2H, CH), 5.21 (s, 1H, CH nacac backbone), 2.35 (s, 6H, $\text{CH}_3$ ), 2.14 (s, 3H, $\text{CH}_3$ ), 2.04 (s, 3H, $\text{CH}_3$ ).                                                                                                        | 195.8 (CO), 160.7 (N-C=), 138.8 ( <i>i</i> -Cph-NH), 127.3 ( <i>i</i> -Cph), 122.5 (CH), 113.1 ( <i>i</i> -Cph), 97.3 (CH nacac backbone), 29.1 ( $\text{CH}_3$ ), 21.2 ( $\text{CH}_3$ ), 19.8 ( $\text{CH}_3$ ).                                                    |
| <b>3g</b> | 11.84 (s, 1H, NH), 6.89 (s, 2H, CH), 5.18 (s, 1H, CH nacac backbone), 2.27 (s, 3H, $\text{CH}_3$ ), 2.14 (s, 6H, $\text{CH}_3$ ), 2.09 (s, 3H, $\text{CH}_3$ ), 1.61 (s, 3H, $\text{CH}_3$ ).                                                                                            | 195.9 (CO), 163.2 (N-C=), 137.1 ( <i>i</i> -Cph-NH), 135.8 ( <i>i</i> -Cph), 134.0 ( <i>i</i> -Cph), 129.0 (CH), 95.7 (CH nacac backbone), 29.1 ( $\text{CH}_3$ ), 21.0 ( $\text{CH}_3$ ), 18.9 ( $\text{CH}_3$ ), 18.2 ( $\text{CH}_3$ ).                            |
| <b>3h</b> | 12.39 (s, 1H, NH), 7.07 (d, $J_{\text{HH}} = 8.1$ Hz, 1H, CH), 6.88 (s, 1H, CH), 6.83 (d, $J_{\text{HH}} = 8.3$ Hz, 1H, CH), 5.14 (s, 1H, CH nacac backbone), 2.23 (s, 6H, $\text{CH}_3$ ), 2.08 (s, 3H, $\text{CH}_3$ ), 1.95 (s, 3H, $\text{CH}_3$ ).                                  | 195.8 (CO), 160.9 (N-C=), 137.5 ( <i>i</i> -Cph-NH), 136.3 ( <i>i</i> -Cph), 134.3 ( <i>i</i> -Cph), 130.1 (CH), 126.2 (CH), 122.3 (CH), 97.1 (CH nacac backbone), 29.1 ( $\text{CH}_3$ ), 19.8 ( $\text{CH}_3$ ), 19.3 ( $\text{CH}_3$ ), 17.6 ( $\text{CH}_3$ ).    |
| <b>3i</b> | 12.28 (s, 1H, NH), 7.10 (d, $J_{\text{HH}} = 7.7$ Hz, 1H, CH), 6.95 (d, $J_{\text{HH}} = 7.7$ Hz, 1H, CH), 6.89 (s, 1H, CH), 5.18 (s, 1H, CH nacac backbone), 2.30 (s, 3H, $\text{CH}_3$ ), 2.22 (s, 3H, $\text{CH}_3$ -Ph), 2.09 (s, 3H, $\text{CH}_3$ ), 1.85 (s, 3H, $\text{CH}_3$ ). | 195.5 (CO), 161.0 (N-C=), 137.0 ( <i>i</i> -Cph-NH), 135.8 ( <i>i</i> -Cph), 130.3 (CH), 130.2 ( <i>i</i> -Cph), 127.0 (CH), 126.6 (CH), 96.6 (CH nacac backbone), 28.7 ( $\text{CH}_3$ ), 20.6 ( $\text{CH}_3$ ), 19.3 ( $\text{CH}_3$ ), 17.3 ( $\text{CH}_3$ -Ph). |
| <b>3j</b> | 12.25 (s, 1H, NH), 7.21 (s, 1H, Ph), 7.14 (d, $J_{\text{HH}} = 8.4$ Hz, 1H, Ph), 6.99 (d, $J_{\text{HH}} = 8.3$ Hz, 1H, Ph), 5.20 (s, 1H, CH nacac backbone), 2.24 (s, 3H, $\text{CH}_3$ ), 2.09 (s, 3H, $\text{CH}_3$ ), 1.84 (s, 3H, $\text{CH}_3$ ).                                  | 196.5 (CO), 160.8 (N-C=), 136.2 (ipso-Cph), 135.6 ( <i>i</i> -Cph), 131.7 ( <i>i</i> -Cph), 130.7 (CH, Ph), 127.4 (CH, Ph), 126.5 (CH, Ph), 97.6 (CH nacac backbone), 29.2 ( $\text{CH}_3$ ), 19.7 ( $\text{CH}_3$ ), 18.1 ( $\text{CH}_3$ ).                         |

**Table S3.** NMR ( $^1\text{H}$ ,  $^{13}\text{C}\{^1\text{H}\}$ ) data for **4a–j**.

| Complex   | $^1\text{H}$ NMR ( $\text{CDCl}_3$ )                                                                                                                                                                                                                                             | $^{13}\text{C}$ NMR ( $\text{CDCl}_3$ )                                                                                                                                                                                                                                            |
|-----------|----------------------------------------------------------------------------------------------------------------------------------------------------------------------------------------------------------------------------------------------------------------------------------|------------------------------------------------------------------------------------------------------------------------------------------------------------------------------------------------------------------------------------------------------------------------------------|
|           | $\delta$ (ppm)                                                                                                                                                                                                                                                                   | $\delta$ (ppm)                                                                                                                                                                                                                                                                     |
| <b>4a</b> | 7.12 (t, $J_{\text{HH}} = 7.5$ , 2H, Ph), 7.06 (d, $J_{\text{HH}} = 7.1$ , 1H, Ph), 6.91 (t, $J_{\text{HH}} = 7.5$ Hz, 1H, Ph), 4.85 (s, 1H, CH nacac backbone), 2.26 (s, 3H, $\text{CH}_3$ ), 1.59 (s, 3H, $\text{CH}_3$ ), 1.37 (s, 3H, $\text{CH}_3$ ).                       | 176.4 (C=O), 162.6 (N-C=), 147.6 ( <i>i</i> -Cph-N), 133.3 ( <i>i</i> -Cph), 129.5 (CH, Ph), 125.8 (CH, Ph), 125.7 (CH, Ph), 124.9 (CH, Ph), 97.7 (CH nacac backbone), 23.5 ( $\text{CH}_3$ ), 23.4 ( $\text{CH}_3$ ), 18.7 ( $\text{CH}_3$ ).                                     |
| <b>4b</b> | 7.13 (t, $J_{\text{HH}} = 7.6$ Hz, 1H, Ph), 6.94 (d, $J_{\text{HH}} = 7.6$ Hz, 1H, Ph), 6.79 (s, 1H, Ph), 6.76 (d, $J_{\text{HH}} = 7.8$ Hz, 1H, Ph), 4.83 (s, 1H, CH nacac backbone), 2.33 (s, 3H, $\text{CH}_3$ ), 1.66 (s, 3H, $\text{CH}_3$ ), 1.39 (s, 3H, $\text{CH}_3$ ). | 176.1 (C=O), 162.8 (N-C=), 148.6 ( <i>i</i> -Cph-N), 137.5 ( <i>i</i> -Cph), 127.7 (CH, Ph), 126.8 (CH, Ph), 125.4 (CH, Ph), 123.1 (CH, Ph), 97.9 (CH nacac backbone), 23.9 ( $\text{CH}_3$ ), 23.7 ( $\text{CH}_3$ ), 21.4 ( $\text{CH}_3$ ).                                     |
| <b>4c</b> | 7.7 (d, $J_{\text{HH}} = 12.0$ Hz, 2H, Ph), 6.85 (d, $J_{\text{HH}} = 7.7$ Hz, 2H, Ph), 4.83 (s, 1H, CH nacac backbone), 2.31 (s, 3H, $\text{CH}_3$ ), 1.66 (s, 3H, $\text{CH}_3$ ), 1.40 (s, 3H, $\text{CH}_3$ ).                                                               | 176.2 (C=O), 162.9 (N-C=), 146.1 ( <i>i</i> -Cph-N), 134.0 ( <i>i</i> -Cph), 128.5 (CH), 125.9 (CH), 97.9 (CH nacac backbone), 23.9 ( $\text{CH}_3$ ), 23.6 ( $\text{CH}_3$ ), 21.1 ( $\text{CH}_3$ ).                                                                             |
| <b>4d</b> | 6.95-6.92 (m, 2H, Ph), 6.78 (d, $J_{\text{HH}} = 7.8$ Hz, 1H, Ph), 4.83 (s, 1H, CH nacac backbone), 2.27 (s, 3H, $\text{CH}_3$ ), 2.21 (s, 3H, $\text{CH}_3$ ), 1.59 (s, 3H, $\text{CH}_3$ ), 1.40 (s, 3H, $\text{CH}_3$ ).                                                      | 176.4 (C=O), 162.7 (N-C=), 144.9 ( <i>i</i> -Cph- $\text{CH}_3$ ), 134.2 ( <i>i</i> -Cph-N), 132.8 (CH), 130.2 ( <i>i</i> -Cph), 126.3 (CH), 125.6 (CH), 97.7 (CH nacac backbone), 23.6 ( $\text{CH}_3$ ), 23.4 ( $\text{CH}_3$ ), 21.1 ( $\text{CH}_3$ ), 18.6 ( $\text{CH}_3$ ). |
| <b>4e</b> | 6.93 (bs, 3H, Ph), 4.85 (s, 1H, CH nacac backbone), 2.25 (s, 6H, $\text{CH}_3$ ), 1.53 (s, 3H, $\text{CH}_3$ ), 1.37 (s, 3H, $\text{CH}_3$ ).                                                                                                                                    | 176.6 (C=O), 162.2 (N-C=), 146.4 ( <i>i</i> -Cph-N), 132.7 ( <i>i</i> -Cph), 127.3 (CH), 124.7 (CH), 97.5 (CH nacac backbone), 23.5 ( $\text{CH}_3$ ), 22.6 ( $\text{CH}_3$ ), 18.9 ( $\text{CH}_3$ ).                                                                             |
| <b>4f</b> | 6.77 (s, 1H, Ph), 6.58 (s, 2H, Ph), 4.82 (s, 1H, CH nacac backbone), 2.29 (s, 6H, $\text{CH}_3$ , Ph), 1.67 (s, 3H, $\text{CH}_3$ ), 1.41 (s, 3H, $\text{CH}_3$ ).                                                                                                               | 175.9 (C=O), 162.7 (N-C=), 148.4 ( <i>i</i> -Cph-N), 137.2 ( <i>i</i> -Cph), 126.2 (CH), 123.8 (CH), 97.9 (CH nacac backbone), 23.8 ( $\text{CH}_3$ ), 23.7 ( $\text{CH}_3$ ), 21.4 ( $\text{CH}_3$ ).                                                                             |
| <b>4g</b> | 6.80 (s, 2H, Ph), 4.83 (s, 1H, CH nacac backbone), 2.23 (s, 3H, $\text{CH}_3$ ), 2.19 (s, 6H, $\text{CH}_3$ ), 1.52 (s, 3 H, $\text{CH}_3$ ), 1.39 (s, 3H, $\text{CH}_3$ ).                                                                                                      | 176.6 (C=O), 162.3 (N-C=), 143.8 ( <i>i</i> -Cph-N), 133.9 ( <i>i</i> -Cph), 132.4 ( <i>i</i> -Cph), 128.0 (CH), 97.5 (CH nacac backbone), 23.5 ( $\text{CH}_3$ ), 22.5 ( $\text{CH}_3$ ), 21.1 ( $\text{CH}_3$ ), 18.9 ( $\text{CH}_3$ ).                                         |
| <b>4h</b> | 7.00 (d, $J_{\text{HH}} = 7.8$ Hz 1H, Ph), 6.73 (s, 1H, Ph), 6.68 (d, $J_{\text{HH}} = 8.0$ Hz, 1H, Ph), 4.81 (s, 1H, CH nacac backbone), 2.23 (s, 3H, $\text{CH}_3$ ), 2.20 (s, 3H, $\text{CH}_3$ ), 1.66 (s, 3H, $\text{CH}_3$ ), 1.39 (s, 3H, $\text{CH}_3$ ).                | 176.1 (C=O), 162.8 (N-C=), 146.2 ( <i>i</i> -Cph-N), 135.7 ( <i>i</i> -Cph), 132.6 (CH), 129.0 ( <i>i</i> -Cph), 127.3 (CH), 123.3 (CH), 97.9 (CH nacac backbone), 23.9 ( $\text{CH}_3$ ), 23.7 ( $\text{CH}_3$ ), 19.9 ( $\text{CH}_3$ ), 19.4 ( $\text{CH}_3$ ).                 |
| <b>4i</b> | 6.99 (d, $J_{\text{HH}} = 7.6$ Hz, 2H, Ph), 6.87 (d, $J_{\text{HH}} = 7.7$ Hz, 1H, Ph), 6.71 (s, 1H, Ph), 4.83 (s, 1H, CH nacac backbone), 2.30 (s, 3H, $\text{CH}_3$ ), 2.20 (s, 3H, $\text{CH}_3$ ), 1.59 (s, 3H, $\text{CH}_3$ ), 1.39 (s, 3H, $\text{CH}_3$ ).               | 176.3 (C=O), 162.5 (N-C=), 147.2 ( <i>i</i> -Cph-N), 135.1 ( <i>i</i> -Cph), 130.0 ( <i>i</i> -Cph), 129.3 ( <i>i</i> -Cph), 126.4 (CH), 125.6 (CH), 97.7 (CH nacac backbone), 23.6 ( $\text{CH}_3$ ), 23.4 ( $\text{CH}_3$ ), 21.1 (CH), 18.3 (CH).                               |
| <b>4j</b> | 7.12 (s, 1H, Ph), 7.09 (d, $J_{\text{HH}} = 7.7$ Hz, 1H, Ph), 6.82 (dd, $J_{\text{HH}} = 7.7$ Hz, 4.7 Hz, 1H, Ph), 4.86 (s, 1H, CH nacac backbone), 2.21 (s, 3H, $\text{CH}_3$ ), 1.59 (s, 3H, $\text{CH}_3$ ), 1.41 (s, 3H, $\text{CH}_3$ ).                                    | 176.9 (CO), 162.8 (N-C=), 146.0 (ipso-Cph), 135.3 ( <i>i</i> -Cph), 130.0 (CH), 129.3 ( <i>i</i> -Cph), 127.2 (CH), 125.8 (CH), 97.9 (CH nacac backbone), 23.8 ( $\text{CH}_3$ ), 23.5 ( $\text{CH}_3$ ) ppm, 18.6 ( $\text{CH}_3$ ) ppm.                                          |

**Table S4.** Analysis for each peak observed from HRMS for complexes **4a–j**.

| 4a                |                   |                                            |              |                                             |
|-------------------|-------------------|--------------------------------------------|--------------|---------------------------------------------|
| Pd Isotope        | # <sup>13</sup> C | Calculated [M+H] <sup>+</sup>              | Observed m/z | Notes                                       |
| <sup>102</sup> Pd | 0                 | 479.12800                                  | 479.32101    | Monoisotopic <sup>102</sup> Pd              |
| <sup>104</sup> Pd | 0                 | 481.12640                                  | 481.12341    | Monoisotopic <sup>104</sup> Pd              |
| <sup>105</sup> Pd | 0                 | 482.12750                                  | 482.12474    | Monoisotopic <sup>105</sup> Pd              |
| <sup>106</sup> Pd | 0                 | 483.12590                                  | 483.12391    | Monoisotopic <sup>106</sup> Pd              |
| <sup>106</sup> Pd | 1                 | 484.12923                                  | 484.12635    | <sup>13</sup> C satellite <sup>106</sup> Pd |
| <sup>108</sup> Pd | 0                 | 485.12630                                  | 485.12397    | Monoisotopic <sup>108</sup> Pd              |
| <sup>108</sup> Pd | 1                 | 486.12963                                  | 486.12744    | <sup>13</sup> C satellite <sup>108</sup> Pd |
| <sup>110</sup> Pd | 0                 | 487.12760                                  | 487.12509    | Monoisotopic <sup>110</sup> Pd              |
| <sup>110</sup> Pd | 1                 | 488.13093                                  | 488.12815    | <sup>13</sup> C satellite / adduct          |
| 4b                |                   |                                            |              |                                             |
| Pd Isotope        | # <sup>13</sup> C | Calculated [M+H] <sup>+</sup>              | Observed m/z | Notes                                       |
| <sup>102</sup> Pd | 0                 | 479.12800                                  | 479.12567    | Monoisotopic <sup>102</sup> Pd              |
| <sup>102</sup> Pd | 1                 | 480.13133                                  | 480.12567    | <sup>13</sup> C satellite <sup>102</sup> Pd |
| <sup>104</sup> Pd | 0                 | 481.12640                                  | 481.12737    | Monoisotopic <sup>104</sup> Pd              |
| <sup>105</sup> Pd | 0                 | 482.12750                                  | 482.12684    | Monoisotopic <sup>105</sup> Pd              |
| <sup>106</sup> Pd | 0                 | 483.12590                                  | 483.12749    | Monoisotopic <sup>106</sup> Pd              |
| <sup>106</sup> Pd | 1                 | 484.12923                                  | 484.34503    | <sup>13</sup> C satellite <sup>106</sup> Pd |
| <sup>108</sup> Pd | 0                 | 485.12630                                  | 485.16542    | Monoisotopic <sup>108</sup> Pd              |
| <sup>108</sup> Pd | 1                 | 486.12963                                  | 485.30033    | <sup>13</sup> C satellite <sup>108</sup> Pd |
| <sup>108</sup> Pd | 1                 | 486.12963                                  | 486.16587    | <sup>13</sup> C satellite <sup>108</sup> Pd |
| <sup>110</sup> Pd | 0                 | 487.12760                                  | 487.12509    | Monoisotopic <sup>110</sup> Pd              |
| <sup>110</sup> Pd | 1                 | 488.13093                                  | 488.12815    | <sup>13</sup> C satellite <sup>110</sup> Pd |
| <sup>110</sup> Pd | 2                 | ~489.13426                                 | 489.18050    | 2 <sup>13</sup> C satellite                 |
| <sup>110</sup> Pd | 2                 | ~489.13426                                 | 489.31050    | 2 <sup>13</sup> C satellite / adduct        |
| 4c                |                   |                                            |              |                                             |
| Pd Isotope        | # <sup>13</sup> C | Calculated [M+H] <sup>+</sup>              | Observed m/z | Notes                                       |
| <sup>102</sup> Pd | 0                 | 479.12800                                  | 479.10229    | Monoisotopic <sup>102</sup> Pd              |
| <sup>102</sup> Pd | 1                 | 480.13133                                  | 480.12567    | <sup>13</sup> C satellite <sup>102</sup> Pd |
| <sup>104</sup> Pd | 0                 | 481.12640                                  | 481.15242    | Monoisotopic <sup>104</sup> Pd              |
| <sup>105</sup> Pd | 0                 | 482.12750                                  | 482.12684    | Monoisotopic <sup>105</sup> Pd              |
| <sup>106</sup> Pd | 0                 | 483.12590                                  | 483.34186    | Monoisotopic <sup>106</sup> Pd              |
| <sup>106</sup> Pd | 1                 | 484.12923                                  | 484.12457    | <sup>13</sup> C satellite <sup>106</sup> Pd |
| <sup>108</sup> Pd | 0                 | 485.12630                                  | 485.07917    | Monoisotopic <sup>108</sup> Pd              |
| <sup>108</sup> Pd | 1                 | 486.12963                                  | 486.08154    | <sup>13</sup> C satellite <sup>108</sup> Pd |
| <sup>110</sup> Pd | 0                 | 487.12760                                  | 487.07277    | Monoisotopic <sup>110</sup> Pd              |
| <sup>110</sup> Pd | 1                 | 488.13093                                  | 488.12815    | <sup>13</sup> C satellite <sup>110</sup> Pd |
| 4d                |                   |                                            |              |                                             |
| Pd Isotope        | # <sup>13</sup> C | Calculated [M+H] <sup>+</sup> (5 decimals) | Observed m/z | Notes                                       |
| <sup>102</sup> Pd | 1                 | 507.15933                                  | 507.15841    | <sup>13</sup> C satellite <sup>102</sup> Pd |
| <sup>104</sup> Pd | 0                 | 508.15440                                  | 508.12540    | Monoisotopic <sup>104</sup> Pd              |
| <sup>105</sup> Pd | 0                 | 509.15550                                  | 509.15539    | Monoisotopic <sup>105</sup> Pd              |
| <sup>106</sup> Pd | 0                 | 510.15390                                  | 510.15676    | Monoisotopic <sup>106</sup> Pd              |
| <sup>106</sup> Pd | 1                 | 511.15723                                  | 511.15586    | <sup>13</sup> C satellite <sup>106</sup> Pd |
| <sup>108</sup> Pd | 0                 | 512.15430                                  | 512.15874    | Monoisotopic <sup>108</sup> Pd              |
| <sup>108</sup> Pd | 1                 | 513.15763                                  | 513.15567    | <sup>13</sup> C satellite <sup>108</sup> Pd |
| <sup>110</sup> Pd | 0                 | 514.15560                                  | 514.15919    | Monoisotopic <sup>110</sup> Pd              |
| <sup>110</sup> Pd | 1                 | 515.15893                                  | 515.15781    | <sup>13</sup> C satellite <sup>110</sup> Pd |
| <sup>110</sup> Pd | 2                 | 516.16226                                  | 516.16017    | 2 <sup>13</sup> C satellite / minor peak    |
| 4e                |                   |                                            |              |                                             |
| Pd Isotope        | # <sup>13</sup> C | Calculated [M+H] <sup>+</sup> (5 decimals) | Observed m/z | Notes                                       |
| <sup>105</sup> Pd | 0                 | 509.15550                                  | 509.15482    | Monoisotopic <sup>105</sup> Pd              |
| <sup>106</sup> Pd | 0                 | 510.15390                                  | 510.15602    | Monoisotopic <sup>106</sup> Pd              |
| <sup>106</sup> Pd | 1                 | 511.15723                                  | 511.15555    | <sup>13</sup> C satellite <sup>106</sup> Pd |
| <sup>108</sup> Pd | 0                 | 512.15430                                  | 512.15794    | Monoisotopic <sup>108</sup> Pd              |
| <sup>108</sup> Pd | 1                 | 513.15763                                  | 513.15536    | <sup>13</sup> C satellite <sup>108</sup> Pd |
| <sup>110</sup> Pd | 0                 | 514.15560                                  | 514.15856    | Monoisotopic <sup>110</sup> Pd              |
| <sup>110</sup> Pd | 1                 | 515.15893                                  | 515.15726    | <sup>13</sup> C satellite <sup>110</sup> Pd |
| <sup>110</sup> Pd | 2                 | 516.16226                                  | 516.16193    | 2 <sup>13</sup> C satellite / minor peak    |
| 4f                |                   |                                            |              |                                             |
| Pd Isotope        | # <sup>13</sup> C | Calculated [M+H] <sup>+</sup>              | Observed m/z | Notes                                       |
| <sup>102</sup> Pd | 1                 | 507.15933                                  | 507.15921    | <sup>13</sup> C satellite <sup>102</sup> Pd |
| <sup>105</sup> Pd | 0                 | 509.15550                                  | 509.15636    | Monoisotopic <sup>105</sup> Pd              |

|                   |                                   |                                     |                                     |                                                 |                                                                     |
|-------------------|-----------------------------------|-------------------------------------|-------------------------------------|-------------------------------------------------|---------------------------------------------------------------------|
| 106Pd             | 0                                 | 510.15390                           | 510.15747                           | Monoisotopic <sup>106</sup> Pd                  |                                                                     |
| 106Pd             | 1                                 | 511.15723                           | 511.15553                           | <sup>13</sup> C satellite <sup>106</sup> Pd     |                                                                     |
| 108Pd             | 0                                 | 512.15430                           | 512.15997                           | Monoisotopic <sup>108</sup> Pd                  |                                                                     |
| 108Pd             | 1                                 | 513.15763                           | 513.15566                           | <sup>13</sup> C satellite <sup>108</sup> Pd     |                                                                     |
| 110Pd             | 0                                 | 514.15560                           | 514.16123                           | Monoisotopic <sup>110</sup> Pd                  |                                                                     |
| 110Pd             | 1                                 | 515.15893                           | 515.15950                           | <sup>13</sup> C satellite <sup>110</sup> Pd     |                                                                     |
| 110Pd             | 2                                 | 516.16226                           | 516.16123                           | 2 <sup>13</sup> C satellite / minor peak        |                                                                     |
| <b>4g</b>         |                                   |                                     |                                     |                                                 |                                                                     |
| <b>Pd Isotope</b> | <b>#<sup>13</sup>C</b>            | <b>Calculated [M+H]<sup>+</sup></b> | <b>Observed m/z</b>                 | <b>Notes</b>                                    |                                                                     |
| <sup>102</sup> Pd | 1                                 | 535.19353                           | 535.19205                           | <sup>13</sup> C satellite <sup>102</sup> Pd     |                                                                     |
| <sup>104</sup> Pd | 0                                 | 536.18860                           |                                     | Monoisotopic <sup>104</sup> Pd                  |                                                                     |
| <sup>105</sup> Pd | 0                                 | 537.18970                           | 537.18911                           | Monoisotopic <sup>105</sup> Pd                  |                                                                     |
| <sup>106</sup> Pd | 0                                 | 538.19010                           | 538.19063                           | Monoisotopic <sup>106</sup> Pd                  |                                                                     |
| <sup>108</sup> Pd | 0                                 | 540.19050                           | 540.19310                           | Monoisotopic <sup>108</sup> Pd                  |                                                                     |
| <sup>108</sup> Pd | 1                                 | 541.19383                           | 541.18896                           | <sup>13</sup> C satellite <sup>108</sup> Pd     |                                                                     |
| <sup>110</sup> Pd | 0                                 | 542.19180                           | 542.19407                           | Monoisotopic <sup>110</sup> Pd                  |                                                                     |
| <sup>110</sup> Pd | 1                                 | 543.19513                           | 543.19194                           | <sup>13</sup> C satellite <sup>110</sup> Pd     |                                                                     |
| <sup>110</sup> Pd | 2                                 | 544.19846                           | 544.19522                           | 2 <sup>13</sup> C satellite / minor peak        |                                                                     |
| <b>4h</b>         |                                   |                                     |                                     |                                                 |                                                                     |
| <b>Pd Isotope</b> | <b>#<sup>13</sup>C</b>            | <b>Calculated [M+H]<sup>+</sup></b> | <b>Observed m/z</b>                 | <b>Notes</b>                                    |                                                                     |
| <sup>105</sup> Pd | 0                                 | 509.15550                           | 509.15749                           | Monoisotopic <sup>105</sup> Pd                  |                                                                     |
| <sup>106</sup> Pd | 0                                 | 510.15390                           | 510.15824                           | Monoisotopic <sup>106</sup> Pd                  |                                                                     |
| <sup>106</sup> Pd | 1                                 | 511.15723                           | 511.15782                           | <sup>13</sup> C satellite <sup>106</sup> Pd     |                                                                     |
| <sup>108</sup> Pd | 0                                 | 512.15430                           | 512.16075                           | Monoisotopic <sup>108</sup> Pd                  |                                                                     |
| <sup>108</sup> Pd | 1                                 | 513.15763                           | 513.15770                           | <sup>13</sup> C satellite <sup>108</sup> Pd     |                                                                     |
| <sup>110</sup> Pd | 0                                 | 514.15560                           | 514.16140                           | Monoisotopic <sup>110</sup> Pd                  |                                                                     |
| <sup>110</sup> Pd | 1                                 | 515.15893                           | 515.15976                           | <sup>13</sup> C satellite <sup>110</sup> Pd     |                                                                     |
| <sup>110</sup> Pd | 2                                 | 516.16226                           | 516.16182                           | 2 <sup>13</sup> C satellite / minor peak        |                                                                     |
| <b>4i</b>         |                                   |                                     |                                     |                                                 |                                                                     |
| <b>Pd Isotope</b> | <b>#<sup>13</sup>C</b>            | <b>Calculated [M+H]<sup>+</sup></b> | <b>Observed m/z</b>                 | <b>Notes</b>                                    |                                                                     |
| <sup>105</sup> Pd | 0                                 | 509.15550                           | 509.15735                           | Monoisotopic <sup>105</sup> Pd                  |                                                                     |
| <sup>106</sup> Pd | 0                                 | 510.15390                           | 510.15930                           | Monoisotopic <sup>106</sup> Pd                  |                                                                     |
| <sup>106</sup> Pd | 1                                 | 511.15723                           | 511.15810                           | <sup>13</sup> C satellite <sup>106</sup> Pd     |                                                                     |
| <sup>108</sup> Pd | 0                                 | 512.15430                           | 512.16103                           | Monoisotopic <sup>108</sup> Pd                  |                                                                     |
| <sup>108</sup> Pd | 1                                 | 513.15763                           | 513.15819                           | <sup>13</sup> C satellite <sup>108</sup> Pd     |                                                                     |
| <sup>110</sup> Pd | 0                                 | 514.15560                           | 514.16262                           | Monoisotopic <sup>110</sup> Pd                  |                                                                     |
| <sup>110</sup> Pd | 1                                 | 515.15893                           | 515.16063                           | <sup>13</sup> C satellite <sup>110</sup> Pd     |                                                                     |
| <sup>110</sup> Pd | 2                                 | 516.16226                           | 516.16278                           | 2 <sup>13</sup> C satellite / minor peak        |                                                                     |
| <sup>110</sup> Pd | 2                                 | 516.16226                           | 517.36075                           | Likely adduct or combined isotopic contribution |                                                                     |
| <b>4j</b>         |                                   |                                     |                                     |                                                 |                                                                     |
| <b>Pd isotope</b> | <b>Cl isotope</b>                 | <b>#<sup>13</sup>C</b>              | <b>Calculated [M+H]<sup>+</sup></b> | <b>Observed m/z</b>                             | <b>Notes</b>                                                        |
| <sup>102</sup> Pd | <sup>35</sup> Cl <sub>2</sub>     | 0.00000                             | 549.04296                           | 549.04296                                       | Monoisotopic <sup>102</sup> Pd + <sup>35</sup> Cl <sub>2</sub>      |
| <sup>102</sup> Pd | <sup>35</sup> Cl <sub>2</sub>     | 1.00000                             | 550.04631                           | 550.04581                                       | <sup>13</sup> C satellite                                           |
| <sup>102</sup> Pd | <sup>35</sup> Cl <sup>37</sup> Cl | 0.00000                             | 551.03991                           | 551.04546                                       | Cl M+2                                                              |
| <sup>104</sup> Pd | <sup>35</sup> Cl <sub>2</sub>     | 0.00000                             | 551.04033                           | 550.04581                                       | <sup>104</sup> Pd monoisotopic (overlaps with <sup>13</sup> C peak) |
| <sup>105</sup> Pd | <sup>35</sup> Cl <sub>2</sub>     | 0.00000                             | 552.04140                           | 552.04377                                       | <sup>105</sup> Pd monoisotopic                                      |
| <sup>106</sup> Pd | <sup>35</sup> Cl <sub>2</sub>     | 0.00000                             | 553.03950                           | 553.04397                                       | <sup>106</sup> Pd monoisotopic                                      |
| <sup>108</sup> Pd | <sup>35</sup> Cl <sub>2</sub>     | 0.00000                             | 555.03900                           | 555.31421                                       | <sup>108</sup> Pd monoisotopic                                      |
| <sup>108</sup> Pd | <sup>35</sup> Cl <sub>2</sub>     | 1.00000                             | 556.04235                           | 556.31741                                       | <sup>108</sup> Pd + <sup>13</sup> C (also small Cl contribution)    |
| <sup>102</sup> Pd | <sup>37</sup> Cl <sub>2</sub>     | 0.00000                             | 553.03500                           | 553.04397                                       | <sup>102</sup> Pd + <sup>37</sup> Cl <sub>2</sub>                   |
| <sup>105</sup> Pd | <sup>35</sup> Cl <sup>37</sup> Cl | 0.00000                             | 554.03805                           | 554.04579                                       | <sup>105</sup> Pd + <sup>35</sup> Cl <sup>37</sup> Cl               |
| <sup>106</sup> Pd | <sup>35</sup> Cl <sup>37</sup> Cl | 0.00000                             | 555.03615                           | 555.31421                                       | <sup>106</sup> Pd + <sup>35</sup> Cl <sup>37</sup> Cl               |
| <sup>110</sup> Pd | <sup>35</sup> Cl <sub>2</sub>     | 0.00000                             |                                     | 556.31741                                       | <sup>110</sup> Pd + <sup>35</sup> Cl <sub>2</sub>                   |

**Table S5.** Crystal data and structure refinement for compound **4c**.

|                                                     | <b>4c</b>                                                        |
|-----------------------------------------------------|------------------------------------------------------------------|
| Empirical formula                                   | C <sub>24</sub> H <sub>28</sub> N <sub>2</sub> O <sub>2</sub> Pd |
| Formula weight                                      | 482.88                                                           |
| Temperature                                         | 120.02(10) K                                                     |
| Wavelength                                          | 1.54184 Å                                                        |
| Crystal system                                      | Triclinic                                                        |
| Space group                                         | <i>P</i> -1                                                      |
| Unit cell dimensions                                |                                                                  |
| <i>A</i>                                            | 7.4798(3) Å                                                      |
| <i>B</i>                                            | 7.8326(3) Å                                                      |
| <i>C</i>                                            | 9.4659(4) Å                                                      |
| $\alpha$                                            | 78.533(3)°                                                       |
| $\beta$                                             | 86.809(3)°                                                       |
| $\gamma$                                            | 85.861(3)°                                                       |
| Volume                                              | 541.60(4) Å <sup>3</sup>                                         |
| <i>Z</i>                                            | 1                                                                |
| Density (calculated)                                | 1.481 Mg/m <sup>3</sup>                                          |
| Absorption coefficient                              | 7.077 mm <sup>-1</sup>                                           |
| <i>F</i> (000)                                      | 248                                                              |
| Crystal size                                        | 366 · 0.256 · 0.102 mm <sup>3</sup>                              |
| Theta range for data collection                     | 4.771 to 66.475°                                                 |
| Index ranges                                        | -8 ≤ <i>h</i> ≤ 8,<br>-8 ≤ <i>k</i> ≤ 9,<br>-9 ≤ <i>l</i> ≤ 11   |
| Reflections collected                               | 7423                                                             |
| Independent reflections                             | 1900 ( <i>R</i> <sub>int</sub> = 0.0662)                         |
| Completeness to (theta) =                           | (66.475) 99.7 %                                                  |
| Absorption correction                               | Gaussian                                                         |
| Max. and min. transmission                          | 1.00000 and 0.176                                                |
| Refinement method                                   | Full-matrix least-squares on <i>F</i> <sup>2</sup>               |
| Data / restraints / parameters                      | 1900 / 0 / 136                                                   |
| Goodness-of-fit on <i>F</i> <sup>2</sup>            | 1.089                                                            |
| Final <i>R</i> indices [ <i>I</i> > 2σ( <i>I</i> )] | <i>R</i> 1 = 0.0389, <i>wR</i> 2 = 0.0979                        |
| <i>R</i> indices (all data)                         | <i>R</i> 1 = 0.0389, <i>wR</i> 2 = 0.0979+                       |
| Largest diff. peak and hole                         | 2.015 and -1.426 e·Å <sup>-3</sup>                               |

**Table S6.** Selected experimental and calculated bond distances (Å) for compounds **4c**. Calculations performed at the PBE0/def2-TZVP/CPCM (chloroform) level of theory.

|            | <b>4c [Å] Exp.</b> | <b>4c [Å] Cal.</b> |
|------------|--------------------|--------------------|
| C(1)-C(2)  | 1.501(5)           | 1.501              |
| C(2)-O(1)  | 1.272(5)           | 1.276              |
| C(2)-C(3)  | 1.380(6)           | 1.381              |
| C(3)-C(4)  | 1.417(5)           | 1.411              |
| C(4)-N(1)  | 1.308(5)           | 1.313              |
| C(4)-C(5)  | 1.521(5)           | 1.505              |
| C(6)-N(1)  | 1.437(4)           | 1.423              |
| O(1)-Pd(1) | 1.991(3)           | 1.983              |
| Pd(1)-N(1) | 2.031(3)           | 2.040              |

**Table S7.** Selected experimental and calculated bond angles (°) for compounds **4c**. Calculations performed at the PBE0/def2-TZVP/CPCM (chloroform) level of theory.

|                  | <b>4c</b> [°] | Calculated<br><b>4c</b> [°] |
|------------------|---------------|-----------------------------|
| O(1)-C(2)-C(3)   | 126.6(3)      | 126.40                      |
| O(1)-C(2)-C(1)   | 113.8(3)      | 114.00                      |
| C(3)-C(2)-C(1)   | 119.5(3)      | 119.54                      |
| C(2)-C(3)-C(4)   | 126.6(4)      | 126.87                      |
| N(1)-C(4)-C(3)   | 124.9(3)      | 124.49                      |
| N(1)-C(4)-C(5)   | 119.8(3)      | 119.67                      |
| C(3)-C(4)-C(5)   | 115.4(3)      | 115.85                      |
| C(2)-O(1)-Pd(1)  | 125.4(2)      | 126.02                      |
| O(1)-Pd(1)-N(1)  | 92.50(12)     | 92.11                       |
| C(4)-N(1)-C(6)   | 118.2(3)      | 117.93                      |
| C(4)-N(1)-Pd(1)  | 123.7(2)      | 124.11                      |
| C(6)-N(1)-Pd(1)  | 118.1(2)      | 117.97                      |
| N(1)-Pd(1)-N(1)1 | 180           | 197.98                      |
| O(1)-Pd(1)-O(1)1 | 180           | 180                         |

**Table S8.** Interaction topology energy table for **4c** at the HF/3-21G level of theory.

| <sup>a</sup> C | <sup>b</sup> N | <sup>c</sup> Symop | <sup>d</sup> R | <sup>e</sup> Electron Density | E <sub>cle</sub> | E <sub>pol</sub> | E <sub>dis</sub> | E <sub>rep</sub> | E <sub>tot</sub> |
|----------------|----------------|--------------------|----------------|-------------------------------|------------------|------------------|------------------|------------------|------------------|
|                | 2              | x, y, z            | 15.88          | HF/3-21G                      | -0.1             | 0                | -4.8             | 1.2              | -3.5             |
|                | 2              | x, y, z            | 11.22          | HF/3-21G                      | -1.5             | -0.3             | -25.7            | 9.9              | -16.9            |
|                | 2              | x, y, z            | 9.46           | HF/3-21G                      | -3.6             | -0.7             | -33              | 12.8             | -23.5            |
|                | 2              | x, y, z            | 7.49           | HF/3-21G                      | -8.1             | -3.5             | -64.5            | 30.3             | -44.1            |
|                | 2              | x, y, z            | 11.74          | HF/3-21G                      | -0.3             | -0.1             | -8.6             | 2.8              | -5.9             |
|                | 2              | x, y, z            | 13.42          | HF/3-21G                      | -4.7             | -1.9             | -34.8            | 18.1             | -22.8            |
|                | 2              | x, y, z            | 7.84           | HF/3-21G                      | -14.2            | -3.6             | -66.5            | 32.3             | -50.6            |

<sup>a</sup>Color codes indicate the molecule with the crystal structures, as shown in **Figure 4**. <sup>b</sup>N represents the number of molecules. <sup>c</sup>Symop is the relational symmetry operation to the ventral molecule. <sup>d</sup>R is the distance between the molecular centroids

**Table S9.** Absolute HOMO and LUMO energies and the HOMO-LUMO gap for **3a–j** calculated at PBE0/def2-TZVP/CPCM (chloroform). All energy units are given in eV.

| Compounds |   |      | Energy/eV | HL gap/eV |
|-----------|---|------|-----------|-----------|
| <b>3a</b> | H | 50.0 | -6.031    | 4.8014    |
|           | L | 51.0 | -1.229    |           |
| <b>3b</b> | H | 50.0 | -6.025    | 4.7979    |
|           | L | 51.0 | -1.228    |           |
| <b>3c</b> | H | 50.0 | -5.957    | 4.7573    |
|           | L | 51.0 | -1.199    |           |
| <b>3d</b> | H | 54.0 | -5.936    | 4.7677    |
|           | L | 55.0 | -1.168    |           |
| <b>4f</b> | H | 54.0 | -6.230    | 5.3493    |
|           | L | 55.0 | -0.881    |           |
| <b>3h</b> | H | 54.0 | -5.994    | 4.7996    |
|           | L | 55.0 | -1.194    |           |
| <b>3i</b> | H | 58.0 | -6.207    | 5.3505    |
|           | L | 59.0 | -0.857    |           |
| <b>3g</b> | H | 54.0 | -5.946    | 4.8081    |
|           | L | 55.0 | -1.138    |           |
| <b>3e</b> | H | 54.0 | -5.995    | 4.7986    |
|           | L | 55.0 | -1.196    |           |
| <b>3j</b> | H | 63.0 | -7.214    | 7.0044    |
|           | L | 64.0 | -0.210    |           |

**Table S10.** Absolute HOMO and LUMO energies and the HOMO-LUMO gap for **4a-j** calculated at PBE0/def2-TZVP/CPCM (chloroform). All energy units are given in eV.

| Compounds |     |     | Energy/eV | HL gap/eV |
|-----------|-----|-----|-----------|-----------|
| <b>4a</b> | H-1 | 108 | -7.5905   | 6.8995    |
|           | H   | 109 | -6.9694   |           |
|           | L   | 110 | -0.0699   |           |
|           | L+1 | 111 | 0.1691    |           |
| <b>4b</b> | H-1 | 108 | -7.5907   | 6.8769    |
|           | H   | 109 | -6.9455   |           |
|           | L   | 110 | -0.0686   |           |
|           | L+1 | 111 | 0.1937    |           |
| <b>4c</b> | H-1 | 108 | -7.5841   | 6.9135    |
|           | H   | 109 | -6.9394   |           |
|           | L   | 110 | -0.0259   |           |
|           | L+1 | 111 | 0.2028    |           |
| <b>4d</b> | H-1 | 116 | -7.493    | 6.9286    |
|           | H   | 117 | -6.9355   |           |
|           | L   | 118 | -0.0069   |           |
|           | L+1 | 119 | 0.2023    |           |
| <b>4e</b> | H-1 | 116 | -7.5972   | 6.915     |
|           | H   | 117 | -6.967    |           |
|           | L   | 118 | -0.052    |           |
|           | L+1 | 119 | 0.1628    |           |
| <b>4f</b> | H-1 | 116 | -7.5689   | 6.8811    |
|           | H   | 117 | -6.9226   |           |
|           | L   | 118 | -0.0415   |           |
|           | L+1 | 119 | 0.2142    |           |
| <b>4g</b> | H-1 | 124 | -7.3019   | 6.5697    |
|           | H   | 125 | -6.7124   |           |
|           | L   | 126 | -0.1427   |           |
|           | L+1 | 127 | 0.0888    |           |
| <b>4h</b> | H-1 | 116 | -7.5345   | 6.9171    |
|           | H   | 117 | -6.916    |           |
|           | L   | 118 | 0.0011    |           |
|           | L+1 | 119 | 0.2246    |           |
| <b>4i</b> | H-1 | 116 | -7.5522   | 6.888     |
|           | H   | 117 | -6.9417   |           |
|           | L   | 118 | -0.0537   |           |
|           | L+1 | 119 | 0.195     |           |
| <b>4j</b> | H-1 | 124 | -7.7994   | 7.4741    |
|           | H   | 125 | -7.6695   |           |
|           | L   | 126 | -0.1954   |           |
|           | L+1 | 127 | -0.0811   |           |

**Table S11.** Experimental and calculated [TD-CAM-B3LYP/def2-TZVP/CPCM(chloroform)] UV-Vis absorption bands of ligands **3a-j** in chloroform solvent.

| Compound  | Experimental UV-Vis bands |                                                                              | Calculated (TD-DFT) UV-Vis bands |                       |                                  |                                  |
|-----------|---------------------------|------------------------------------------------------------------------------|----------------------------------|-----------------------|----------------------------------|----------------------------------|
|           | $\lambda_{\max}$ (nm)     | $\epsilon$ ( $\times 10^4 \text{ M}^{-1}\text{cm}^{-1}$ )<br>[Conc. (mol/L)] | State                            | $\lambda_{\max}$ (nm) | Oscillator strength ( <i>f</i> ) | Major contribution (Coefficient) |
| <b>3a</b> | 318                       | 2.9 [ $2.9 \times 10^{-5}$ ]                                                 | S <sub>1</sub>                   | 298.1                 | 0.640                            | H → L (0.930)                    |
| <b>3b</b> | 325                       | 2.9 [ $3.0 \times 10^{-5}$ ]                                                 | S <sub>1</sub>                   | 297.4                 | 0.712                            | H → L (0.946)                    |
| <b>3c</b> | 323                       | 2.7 [ $2.7 \times 10^{-5}$ ]                                                 | S <sub>1</sub>                   | 298.7                 | 0.763                            | H → L (0.941)                    |
| <b>3d</b> | 318                       | 3.4 [ $2.5 \times 10^{-5}$ ]                                                 | S <sub>1</sub>                   | 299.2                 | 0.684                            | H → L (0.924)                    |
| <b>3e</b> | 310                       | 3.1 [ $2.5 \times 10^{-5}$ ]                                                 | S <sub>2</sub>                   | 268.8                 | 0.571                            | H → L (0.968)                    |
| <b>3f</b> | 327                       | 2.0 [ $2.8 \times 10^{-5}$ ]                                                 | S <sub>1</sub>                   | 297.2                 | 0.716                            | H → L (0.940)                    |
| <b>3g</b> | 312                       | 1.5 [ $4.7 \times 10^{-5}$ ]                                                 | S <sub>2</sub>                   | 268.9                 | 0.591                            | H → L (0.968)                    |
| <b>3h</b> | 322                       | 3.3 [ $2.8 \times 10^{-5}$ ]                                                 | S <sub>1</sub>                   | 295.7                 | 0.738                            | H → L (0.930)                    |
| <b>3i</b> | 317                       | 3.0 [ $2.6 \times 10^{-5}$ ]                                                 | S <sub>1</sub>                   | 298.1                 | 0.645                            | H → L (0.923)                    |
| <b>3j</b> | 309                       | 1.7 [ $4.5 \times 10^{-5}$ ]                                                 | S <sub>1</sub>                   | 297.9                 | 0.665                            | H → L (0.904)                    |

**Table S12.** Experimental and calculated [TD-CAM-B3LYP/def2-TZVP/CPCM(chloroform)] UV-Vis absorption bands of complexes **4a-j** in chloroform as the solvent.

| Compound  | Experimental UV-Vis bands |                                                                           |                       |                                              | Calculated (TD-DFT) UV-Vis bands |                       |                                  |                                  |
|-----------|---------------------------|---------------------------------------------------------------------------|-----------------------|----------------------------------------------|----------------------------------|-----------------------|----------------------------------|----------------------------------|
|           | $\lambda_{\max}$ (nm)     | $\epsilon$ ( $\times 10^4 \text{ M}^{-1}\text{cm}^{-1}$ ) [Conc. (mol/L)] | $\lambda_{\max}$ (nm) | $\epsilon$ ( $\text{M}^{-1}\text{cm}^{-1}$ ) | State                            | $\lambda_{\max}$ (nm) | Oscillator strength ( <i>f</i> ) | Major contribution (Coefficient) |
| <b>4a</b> | 339                       | 1.0 [ $4.3 \times 10^{-5}$ ]                                              | 400                   | 1905                                         | S <sub>5</sub>                   | 315.3                 | 0.361                            | H-1 → L+1 (0.748)                |
| <b>4b</b> | 341                       | 1.2 [ $6.4 \times 10^{-5}$ ]                                              | 420                   | 1087                                         | S <sub>5</sub>                   | 315.3                 | 0.382                            | H-1 → L+1 (0.755)                |
| <b>4c</b> | 335                       | 1.3 [ $6.5 \times 10^{-5}$ ]                                              | 430                   | 615                                          | S <sub>5</sub>                   | 315.4                 | 0.374                            | H-1 → L+1 (0.752)                |
| <b>4d</b> | 337                       | 1.3 [ $6.0 \times 10^{-5}$ ]                                              | 420                   | 802                                          | S <sub>5</sub>                   | 315.6                 | 0.360                            | H-1 → L+1 (0.742)                |
| <b>4e</b> | 336                       | 1.2 [ $5.9 \times 10^{-5}$ ]                                              | 420                   | 660                                          | S <sub>5</sub>                   | 315.9                 | 0.341                            | H-1 → L+1 (0.746)                |
| <b>4f</b> | 342                       | 1.0 [ $6.0 \times 10^{-5}$ ]                                              | 427                   | 864                                          | S <sub>5</sub>                   | 315.3                 | 0.391                            | H-1 → L+1 (0.751)                |
| <b>4g</b> | 342                       | 0.98 [ $7.6 \times 10^{-5}$ ]                                             | 420                   | 630                                          | S <sub>5</sub>                   | 296.2                 | 0.331                            | H-1 → L+1 (0.739)                |
| <b>4h</b> | 335                       | 1.2 [ $5.9 \times 10^{-5}$ ]                                              | 408                   | 1598                                         | S <sub>5</sub>                   | 315.5                 | 0.380                            | H-1 → L+1 (0.750)                |
| <b>4i</b> | 335                       | 1.3 [ $5.9 \times 10^{-5}$ ]                                              | 428                   | 741                                          | S <sub>5</sub>                   | 315.4                 | 0.365                            | H-1 → L+1 (0.743)                |
| <b>4j</b> | 324                       | 1.6 [ $5.4 \times 10^{-5}$ ]                                              | 402                   | 640                                          | S <sub>5</sub>                   | 295.7                 | 0.382                            | H → L+1 (0.742)                  |

**Table S13.** TGA data of **4a–j**.

| <b>Compound</b> | <b>25-220 °C</b> | <b>220-325 °C</b> | <b>325-900 °C</b> | <b>%Ash</b> |
|-----------------|------------------|-------------------|-------------------|-------------|
| <b>4a</b>       | 0                | 67                | 9                 | 24          |
| <b>4b</b>       | 0                | 62                | 12                | 26          |
| <b>4c</b>       | 0.1              | 60                | 13                | 27          |
| <b>4d</b>       | 0                | 61                | 12                | 27          |
| <b>4e</b>       | 0                | 61                | 12                | 28          |
| <b>4f</b>       | 0                | 74                | 4                 | 21          |
| <b>4g</b>       | 0                | 75                | 1                 | 24          |
| <b>4h</b>       | 0                | 54                | 13                | 34          |
| <b>4i</b>       | 1                | 67                | 9                 | 23          |
| <b>4j</b>       | 0                | 75                | 7                 | 18          |

**Table S14.** Chemosensitivity results of complexes **4** and **5** against fibroblast, MCF-7 and HCT-116. Values are stated as 50% inhibitory concentrations (IC<sub>50</sub>) ± Standard Deviation (SD) and are triplicate repeats.

| Co mp.            | Substituent      | IC50 against fibroblast |             | IC50 against MCF7   |           | IC50 against HCT    |          | Co mp. | Substituent | IC50 against fibroblast |           | IC50 against MCF7   |           | IC50 against HCT    |          |
|-------------------|------------------|-------------------------|-------------|---------------------|-----------|---------------------|----------|--------|-------------|-------------------------|-----------|---------------------|-----------|---------------------|----------|
|                   |                  | cell viability data     | Mean±SD     | cell viability data | Mean ±SD  | cell viability data | Mean ±SD |        |             | cell viability data     | Mean ±SD  | cell viability data | Mean ±SD  | cell viability data | Mean ±SD |
| 4a                | 2-Me             | 121.1;                  | 126.7±1.36  | 112.4;              | 122.0     | 106.3;              | 117.67   | 5a     | 2-Cl        | 32.42;                  | 30.30     | 48.57;              | 36.57     | 25.79;              | 43.13    |
|                   |                  | 116.4;                  |             | 118.3;              |           | 114.3;              |          |        |             | 28.18;                  |           | 28.58;              |           | 42.48;              |          |
|                   |                  | 142.5                   |             | 135.4               |           | 132.4               |          |        |             | 30.31                   |           | 32.56               |           | 61.13               |          |
| 4b                | 3-Me             | 35.88;                  | 38.30±2.62  | 13.61;              | 14.49     | 36.02;              | 36.10    | 5b     | 3-Cl        | 35.84;                  | 30.90     | 16.88;              | 16.39     | 75.47;              | 75.765   |
|                   |                  | 41.94;                  |             | 19.40;              |           | 36.88;              |          |        |             | 27.08;                  |           | 14.62;              |           | 76.63;              |          |
|                   |                  | 37.09                   |             | 10.47               |           | 35.41               |          |        |             | 29.68                   |           | 17.67               |           | 75.20               |          |
| 4c                | 4-Me             | 116.4;                  | 108.4±6.08  | 43.38;              | 49.75     | 141.5;              | 140.5    | 5c     | 4-Cl        | 11.26;                  | 9.78±2.62 | 4.917;              | 6.71±1.88 | 115.2;              | 112.7    |
|                   |                  | 101.7;                  |             | 59.22;              |           | 135.2;              |          |        |             | 6.107;                  |           | 5.904;              |           | 103.2;              |          |
|                   |                  | 106.9                   |             | 46.65               |           | 144.8               |          |        |             | 11.98                   |           | 9.305               |           | 119.7               |          |
| 4d                | 2,4-diMe         | 9.48;                   | 10.48±2.44  | 21.76;              | 17.55     | 21.75;              | 28.41    | 5d     | 2,4-Cl      | 107.5;                  | 128.5     | 106.9;              | 118.47    | 98.10;              | 95.93    |
|                   |                  | 13.84;                  |             | 17.11;              |           | 42.26;              |          |        |             | 132.4;                  |           | 114.8;              |           | 98.6;               |          |
|                   |                  | 8.12                    |             | 13.79               |           | 21.22               |          |        |             | 145.5                   |           | 133.7               |           | 91.2                |          |
| 4e                | 2,6-Me           | 55.07;                  | 74.97±1.758 | 48.50;              | 62.76     | 65.81;              | 83.66    | 5e     | 2,6-Cl      | 107.4;                  | 112.3     | 108.3;              | 113.9     | 111.5;              | 109.9    |
|                   |                  | 97.83;                  |             | 80.31;              |           | 96.29;              |          |        |             | 115.7;                  |           | 119.2;              |           | 115.8;              |          |
|                   |                  | 72.01                   |             | 59.48               |           | 88.89               |          |        |             | 113.8                   |           | 114.1               |           | 102.3               |          |
| 4f                | 3,5-Me           | 51.21;                  | 49.41±1.6   | 53.61;              | 51.51     | 76.26;              | 74.3±2.2 | 5f     | 3,5-diCl    | 66.44;                  | 80.16     | 134.5;              | 120.5     | 56.75;              | 58.82    |
|                   |                  | 47.31;                  |             | 50.70;              |           | 71.19;              |          |        |             | 93.92;                  |           | 122.8;              |           | 38.70;              |          |
|                   |                  | 49.71                   |             | 50.21               |           | 75.45               |          |        |             | 80.12                   |           | 104.3               |           | 81.01               |          |
| 4g                | 2,4,6-Me         | 105.3;                  | 110.1±4.19  | 110.2;              | 121.4     | 101.2;              | 105.83   | 5g     | 2,4,6-Cl    | 117.7;                  | 97.81     | 126.2;              | 114.7     | 153.5;              | 130.5    |
|                   |                  | 109.5;                  |             | 121.5;              |           | 104.5;              |          |        |             | 80.76;                  |           | 115.7;              |           | 114.2;              |          |
|                   |                  | 115.5                   |             | 132.5               |           | 111.8               |          |        |             | 94.96                   |           | 102.3               |           | 123.7               |          |
| 4h                | 3,4-Me           | 162.18;                 | 147.4±1.141 | 11.73;              | 13.64     | 37.57;              | 40.32    | 5h     | 2,3-Cl comp | 181.4;                  | 144.0     | 147.2;              | 129.8     | 145.8;              | 137.97   |
|                   |                  | 134.30;                 |             | 12.17;              |           | 43.45;              |          |        |             | 103.8;                  |           | 125.9;              |           | 154.9;              |          |
|                   |                  | 145.81                  |             | 17.02               |           | 39.94               |          |        |             | 146.8                   |           | 116.2               |           | 113.2               |          |
| 4i                | 2,5-Me           | 61.92;                  | 44.73±1.251 | 5.455;              | 5.42±0.45 | 10.95;              | 17.20    | 5i     | 2,4,5-Cl    | 111.2;                  | 122.30    | 108.7;              | 115.33    | 126.2;              | 138.5    |
|                   |                  | 39.75;                  |             | 5.954;              |           | 10.27;              |          |        |             | 149.5;                  |           | 115.8;              |           | 167.5;              |          |
|                   |                  | 32.52                   |             | 4.851               |           | 30.38               |          |        |             | 106.2                   |           | 121.5               |           | 121.8               |          |
| 4j                | 4-Cl-2-Me        | 105.67;                 | 108.5±2.9   | 5.94;               | 6.70±0.62 | 115.5;              | 116.4    |        |             |                         |           |                     |           |                     |          |
|                   |                  | 107.54;                 |             | 7.47;               |           | 132.5;              |          |        |             |                         |           |                     |           |                     |          |
|                   |                  | 112.59                  |             | 6.69                |           | 101.2               |          |        |             |                         |           |                     |           |                     |          |
| Cisplatin control | Positive control | 51.13;                  | 54.02±2.46  | 3.91;               | 4.70±0.97 | 13.08;              | 14.38    |        |             |                         |           |                     |           |                     |          |
|                   |                  | 53.79;                  |             | 6.07;               |           | 17.88;              |          |        |             |                         |           |                     |           |                     |          |
|                   |                  | 57.14                   |             | 4.12                |           | 12.18               |          |        |             |                         |           |                     |           |                     |          |

**Table S15.** Chemosensitivity results of ligands against fibroblast, MCF-7 and HCT-116. Values are stated as 50% inhibitory concentrations (IC<sub>50</sub>) ± Standard Deviation (SD) and are triplicate repeats.

| Substituent  | IC50 against fibroblast   |                       | IC50 against MCF7         |                  | IC50 against HCT          |                  | Substituent     | IC50 against fibroblast      |                     | IC50 against MCF7         |                  | IC50 against HCT          |                 |
|--------------|---------------------------|-----------------------|---------------------------|------------------|---------------------------|------------------|-----------------|------------------------------|---------------------|---------------------------|------------------|---------------------------|-----------------|
|              | cell viability data       | Mean±SD               | cell viability data       | Mean±SD          | cell viability data       | Mean±SD          |                 | cell viability data          | Mean±SD             | cell viability data       | Mean±SD          | cell viability data       | Mean±SD         |
| 2-Me lig     | 131.4;<br>172.7;<br>127.0 | 143.7±<br>20.58       | 111.0;<br>112.3;<br>106.6 | 109.97<br>±2.43  | 122.6;<br>142.3;104<br>.6 | 123.17±15.<br>40 | 2-Cl lig        | 111.64;<br>112.17;<br>114.93 | 112.9<br>±1.45      | 71.40;<br>71.29;<br>71.18 | 71.29±<br>0.089  | 39.99;<br>78.51;<br>71.03 | 63.18±16.<br>68 |
| 3-Me lig     | 109.1;<br>176.8;<br>113.1 | 133.0±<br>31.01       | 123.7;<br>141.7;<br>113.0 | 126.13<br>±11.84 | 131.7;<br>116.3;<br>110.4 | 119.45±8.9<br>8  | 3-Cl lig        | 115.78;<br>116.40;<br>111.25 | 114.4<br>±2.30      | 169.1;<br>120.6;<br>85.76 | 125.15<br>±34.18 | 174.0;<br>115.5;<br>100.6 | 130.0±31.<br>68 |
| 4-Me lig     | 19.93;<br>18.32;<br>18.09 | 18.78±<br>0.819       | 14.84;<br>19.48;<br>15.67 | 16.66±<br>2.02   | 37.71;<br>55.84;<br>47.73 | 47.09±7.42       | 4-Cl lig        | 119.97;<br>159.38;<br>172.6  | 150.6<br>±22.3<br>8 | 55.3;<br>62.99;<br>47.49  | 55.26±<br>6.33   | 42.28;<br>31.73;<br>36.92 | 36.98±4.3<br>1  |
| 2,4-diMe lig | 67.14;<br>57.87;<br>66.64 | 63.88±<br>4.26        | 57.99;<br>66.3;<br>65.03  | 63.11±<br>3.65   | 77.95;<br>70.26;<br>50.22 | 66.14±11.6<br>8  | 2,4-Cl lig      | 102.8;<br>101.2;<br>11.4     | 105.1<br>3±4.4<br>8 | 113.4;<br>121.1;<br>130.9 | 121.8±<br>7.16   | 102.8;<br>101.2;<br>99.4  | 101.13±1.<br>39 |
| 2,6-diMe lig | 49.34;<br>54.79;<br>67.26 | 57.13±<br>7.50        | 100.2;<br>99.03;<br>101.3 | 100.17<br>±0.93  | 36.27;<br>33.08;<br>27.33 | 32.22±3.69       | 2,6-Cl lig      | 100.2;<br>100.5;<br>105.1    | 101.9<br>3±2.2<br>4 | 45.3;<br>48.2; 46.1       | 46.53±<br>1.22   | 110.2;<br>108.2;<br>111.6 | 110.0±1.3<br>40 |
| 3,5-diMe lig | 51.10;<br>41.01;<br>54.31 | 48.81±<br>5.67        | 44.65;<br>33.90;<br>53.19 | 43.91±<br>7.89   | 18.38;<br>26.18;<br>11.43 | 18.66±6.03       | 3,5-diCl ligand | 66.02;<br>60.90;<br>61.90    | 62.94<br>±2.22      | 134.0;<br>111.9;<br>114.2 | 120.03<br>±9.92  | 29.31;<br>29.79;<br>29.70 | 29.6±0.21       |
| 2,4,6-Me     | 130.1;<br>156.1;<br>116.4 | 134.2±<br>16.46       | 123.3;<br>152.1;<br>140.3 | 138.57<br>±11.82 | 150.7;<br>111.6;<br>137.3 | 133.2±16.2<br>2  | 2,4,6-triCl lig | 43.09;<br>44.18;<br>45.33    | 44.2±<br>0.91       | 22.16;<br>26.77;<br>25.74 | 24.8±1<br>.97    | 26.13;<br>41.24;<br>60.87 | 42.7±14.2       |
| 3,4-diMe lig | 40.08;<br>77.61;<br>60.17 | 59.285<br>±15.33<br>5 | 103.5;<br>69.75<br>;82.88 | 85.37±<br>13.89  | 28.11;<br>28.02;<br>16.08 | 24.07±5.65       | 2,3-Cl lig      | 107.2;<br>105.8;<br>106.9    | 106.6<br>±0.60      | 111.2;<br>114.0;<br>115.1 | 113.43<br>±1.64  | 106.0;<br>101.3;<br>103.9 | 103.73±1.<br>92 |
| 2,5-diMe lig | 56.1;<br>42.29;<br>48.03  | 48.81±<br>5.66        | 41.44<br>;54.58<br>;35.71 | 43.91±<br>7.89   | 12.67;<br>26.90;<br>16.40 | 18.66±6.02       | 2,4,5-Cl lig    | 82.3;<br>83.5;79.<br>10      | 81.6±<br>1.85       | 60.3;<br>63.2; 55.1       | 59.5±3<br>.35    | 58.3;<br>55.4; 60.1       | 57.9±1.93       |
| 4-Cl-2-Me    | 130.7;<br>133.3;<br>121.3 | 128.4±<br>5.15        | 123.6;<br>139.7;<br>124.6 | 129.3±<br>7.37   | 139.4;<br>147.4;<br>111.6 | 132.8±15.3<br>4  |                 |                              |                     |                           |                  |                           |                 |

**Table S16.** Chemosensitivity results of complexes **6** and **7**, against HT 116 and MCF-7. Values are stated as 50 % inhibitory concentrations ( $IC_{50}$ )  $\pm$  Standard Deviation (SD) and are triplicate repeats.<sup>45,46</sup>

| <b>Compound No.</b> | <b>Substituent</b> | <b>HCT 116</b>   | <b>MCF-7</b>     | <b>Compound No.</b> | <b>Substituent</b> | <b>HCT 116</b>   | <b>MCF-7</b>     |
|---------------------|--------------------|------------------|------------------|---------------------|--------------------|------------------|------------------|
| <b>6a</b>           | 2-Me               | 3.45 $\pm$ 0.20  | 35.61 $\pm$ 0.16 | <b>7a</b>           | 2-Cl               | 55.36 $\pm$ 0.15 | > 100            |
| <b>6b</b>           | 3-Me               | 41.68 $\pm$ 0.22 | > 100            | <b>7b</b>           | 3-Cl               | 14.16 $\pm$ 0.15 | > 100            |
| <b>6c</b>           | 4-Me               | 1.73 $\pm$ 0.22  | > 100            | <b>7c</b>           | 4-Cl               | 0.452 $\pm$ 0.24 | 49.62 $\pm$ 0.17 |
| <b>6d</b>           | 2,4-Me             | 39.39 $\pm$ 0.22 | > 100            | <b>7d</b>           | 2,4-Cl             | 13.35 $\pm$ 0.16 | 61.95 $\pm$ 0.12 |
| <b>6e</b>           | 2,6-Me             | 24.97 $\pm$ 0.23 | > 100            | <b>7e</b>           | NA                 | NA               | NA               |
| <b>8f</b>           | NA                 | NA               | NA               | <b>7f</b>           | 3,5-Cl             | 23.9 $\pm$ 0.17  | > 100            |
| <b>6g</b>           | 2,4,6-Me           | > 400            | > 400            | <b>7g</b>           | NA                 | NA               | NA               |
| <b>6h</b>           | 3,4-Me             | > 400            | > 400            | <b>7h</b>           | 3,4-Cl             | 48.01 $\pm$ 0.16 | > 100            |
| <b>6i</b>           | 2,5-Me             | >400             | > 400            | <b>7i</b>           | NA                 | NA               | NA               |
| <b>6j</b>           | 4-Cl-2-Me          | > 400            | > 400            | <b>7j</b>           | NA                 | NA               | NA               |
| <b>6k</b>           | NA                 | NA               | NA               | <b>7k</b>           | 2,3-Cl             | 34.83 $\pm$ 0.16 | > 100            |
| <b>6l</b>           | NA                 | NA               | NA               | <b>7l</b>           | 2,4,5-Cl           | 3.62 $\pm$ 0.18  | 33.88 $\pm$ 0.16 |
| <b>6m</b>           | NA                 | NA               | NA               | <b>7m</b>           | H                  | 6.91 $\pm$ 0.21  | 81.05 $\pm$ 0.09 |
| <b>6n</b>           | 2-Et               | > 400            | > 400            | <b>7n</b>           | NA                 | NA               | NA               |
| <b>Cisplatin</b>    | Positive control   | 14.38 $\pm$ 2.5  | 4.7 $\pm$ 0.97   |                     |                    |                  |                  |

**Table S17.** Lowest Binding Energy Values of Methyl- and Chloride-substituted Pd(II) Complexes with Targeted Proteins in MCF-7 (Breast Cancer).

| Pd(II) Complex                                       | Binding Affinity Scores (kcal/mol) |              |
|------------------------------------------------------|------------------------------------|--------------|
|                                                      | PIK3CA-E545K                       | ERBB4-Y1242C |
| <b>4a</b> (2-Me-C <sub>6</sub> H <sub>4</sub> )      | -7.416                             | -5.967       |
| <b>4b</b> (3-Me-C <sub>6</sub> H <sub>4</sub> )      | -7.640                             | -7.849       |
| <b>4c</b> (4-Me-C <sub>6</sub> H <sub>4</sub> )      | -8.162                             | -7.937       |
| <b>4d</b> (2,4-Me-C <sub>6</sub> H <sub>3</sub> )    | -7.467                             | -6.019       |
| <b>4e</b> (2,6-Me-C <sub>6</sub> H <sub>3</sub> )    | -6.498                             | -4.623       |
| <b>4f</b> (3,5-Me-C <sub>6</sub> H <sub>3</sub> )    | -6.914                             | -6.279       |
| <b>4g</b> (2,4,6-Me-C <sub>6</sub> H <sub>2</sub> )  | -6.373                             | -4.386       |
| <b>4h</b> (3,4-Me-C <sub>6</sub> H <sub>3</sub> )    | -7.393                             | -8.059       |
| <b>4i</b> (2,5-Me-C <sub>6</sub> H <sub>3</sub> )    | -6.591                             | -4.672       |
| <b>4j</b> (4-Cl-2-Me-C <sub>6</sub> H <sub>3</sub> ) | -7.639                             | -6.253       |
| <b>5a</b> (2-Cl-C <sub>6</sub> H <sub>4</sub> )      | -7.591                             | -6.216       |
| <b>5b</b> (3-Cl-C <sub>6</sub> H <sub>4</sub> )      | -7.893                             | -8.245       |
| <b>5c</b> (4-Cl-C <sub>6</sub> H <sub>4</sub> )      | -8.469                             | -8.245       |
| <b>5d</b> (2,4-Cl-C <sub>6</sub> H <sub>3</sub> )    | -7.925                             | -6.599       |
| <b>5e</b> (2,6-Cl-C <sub>6</sub> H <sub>3</sub> )    | -6.870                             | -4.925       |
| <b>5f</b> (3,5-Cl-C <sub>6</sub> H <sub>3</sub> )    | -7.474                             | -6.773       |
| <b>5g</b> (2,4,6-Cl-C <sub>6</sub> H <sub>2</sub> )  | -7.119                             | -4.970       |
| <b>5h</b> (2,3-Cl-C <sub>6</sub> H <sub>3</sub> )    | -7.950                             | -6.332       |
| <b>5i</b> (2,4,5-Cl-C <sub>6</sub> H <sub>2</sub> )  | -6.847                             | -5.520       |

**Table S18.** Lowest Binding Energy Values of Methyl- and Chloride-substituted Pd(II) Complexes with Targeted Proteins in HCT-116 (Colon Cancer).

| Pd(II) Complex                                       | Binding Affinity Scores (kcal/mol) |               |           |
|------------------------------------------------------|------------------------------------|---------------|-----------|
|                                                      | KRAS-G13D                          | PIK3CA-H1047R | ATM-A112V |
| <b>4a</b> (2-Me-C <sub>6</sub> H <sub>4</sub> )      | -5.589                             | -5.530        | -7.324    |
| <b>4b</b> (3-Me-C <sub>6</sub> H <sub>4</sub> )      | -6.593                             | -6.651        | -7.641    |
| <b>4c</b> (4-Me-C <sub>6</sub> H <sub>4</sub> )      | -6.870                             | -6.222        | -7.383    |
| <b>4d</b> (2,4-Me-C <sub>6</sub> H <sub>3</sub> )    | -5.608                             | -5.078        | -6.624    |
| <b>4e</b> (2,6-Me-C <sub>6</sub> H <sub>3</sub> )    | -4.960                             | -4.514        | -6.394    |
| <b>4f</b> (3,5-Me-C <sub>6</sub> H <sub>3</sub> )    | -6.142                             | -5.770        | -6.848    |
| <b>4g</b> (2,4,6-Me-C <sub>6</sub> H <sub>2</sub> )  | -5.197                             | -4.578        | -6.283    |
| <b>4h</b> (3,4-Me-C <sub>6</sub> H <sub>3</sub> )    | -6.792                             | -6.030        | -6.527    |
| <b>4i</b> (2,5-Me-C <sub>6</sub> H <sub>3</sub> )    | -5.180                             | -5.839        | -6.592    |
| <b>4j</b> (4-Cl-2-Me-C <sub>6</sub> H <sub>3</sub> ) | -5.763                             | -5.358        | -6.684    |
| <b>5a</b> (2-Cl-C <sub>6</sub> H <sub>4</sub> )      | -5.896                             | -6.094        | -7.451    |
| <b>5b</b> (3-Cl-C <sub>6</sub> H <sub>4</sub> )      | -6.998                             | -6.764        | -7.915    |
| <b>5c</b> (4-Cl-C <sub>6</sub> H <sub>4</sub> )      | -7.253                             | -6.414        | -7.546    |
| <b>5d</b> (2,4-Cl-C <sub>6</sub> H <sub>3</sub> )    | -6.410                             | -5.594        | -7.126    |
| <b>5e</b> (2,6-Cl-C <sub>6</sub> H <sub>3</sub> )    | -5.312                             | -4.884        | -6.993    |
| <b>5f</b> (3,5-Cl-C <sub>6</sub> H <sub>3</sub> )    | -6.758                             | -5.896        | -7.513    |
| <b>5g</b> (2,4,6-Cl-C <sub>6</sub> H <sub>2</sub> )  | -5.699                             | -5.156        | -6.987    |
| <b>5h</b> (2,3-Cl-C <sub>6</sub> H <sub>3</sub> )    | -6.082                             | -5.660        | -7.347    |
| <b>5i</b> (2,4,5-Cl-C <sub>6</sub> H <sub>2</sub> )  | -6.628                             | -5.668        | -6.946    |

**Table S19.** List of qPCR primers.

| <i>Gene name</i>       | <i>Primer (5' to 3' direction)</i> |
|------------------------|------------------------------------|
| <b><i>Bcl-2</i></b>    | F: GGACAACATCGCCCTGTGGA            |
|                        | R: TCCACAAAGGCATCCCAGCC            |
| <b><i>18S rRNA</i></b> | F: AGAAACGGCTACCACATCCA            |
|                        | R: TACAGGGCCTCGAAAGAGTC            |
| <b><i>Bax</i></b>      | F: GGTCCGGGGAGCAGC                 |
|                        | R: GATCCTGGATGAAACCCTGAAG          |

**Table S20.** Bax:Bcl-2 ratio in different cell types after treatment with different concentration of compounds.

| <b>Cell line</b>       | <b>Compound Concentration (<math>\mu\text{M}</math>)</b> | $\Delta\Delta\text{Ct}_{\text{Bax}} \pm \text{SD}$ | $\Delta\Delta\text{Ct}_{\text{Bcl2}} \pm \text{SD}$ | $\Delta\Delta\text{Ct}_{\text{Bax}} : \Delta\Delta\text{Ct}_{\text{Bcl2}}$ <b>Ratio</b> |
|------------------------|----------------------------------------------------------|----------------------------------------------------|-----------------------------------------------------|-----------------------------------------------------------------------------------------|
| <b>Fibroblast (4h)</b> | 294.86                                                   | $0.07 \pm 0.03$                                    | $1.22 \pm 0.45$                                     | 0.06                                                                                    |
|                        | 147.43                                                   | $0.31 \pm 0.03$                                    | $0.71 \pm 0.20$                                     | 0.43                                                                                    |
| <b>Fibroblast (4a)</b> | 294.86                                                   | $1.59 \pm 0.20$                                    | $0.98 \pm 0.24$                                     | 1.62                                                                                    |
|                        | 147.43                                                   | $0.83 \pm 0.25$                                    | $1.14 \pm 0.35$                                     | 0.72                                                                                    |
| <b>MCF-7 (4h)</b>      | 27.2                                                     | $2.59 \pm 0.16$                                    | $0.21 \pm 0.09$                                     | 12.3                                                                                    |
|                        | 13.6                                                     | $2.25 \pm 0.09$                                    | $0.87 \pm 0.05$                                     | 2.58                                                                                    |
| <b>MCF-7 (4a)</b>      | 27.2                                                     | $0.65 \pm 0.02$                                    | $0.43 \pm 0.00$                                     | 1.51                                                                                    |
|                        | 13.6                                                     | $0.46 \pm 0.16$                                    | $0.35 \pm 0.10$                                     | 1.31                                                                                    |
| <b>HCT116 (4h)</b>     | 80.6                                                     | $2.36 \pm 0.31$                                    | $0.41 \pm 0.02$                                     | 5.75                                                                                    |
|                        | 40.3                                                     | $1.26 \pm 0.18$                                    | $0.36 \pm 0.15$                                     | 3.50                                                                                    |
| <b>HCT116 (4a)</b>     | 80.6                                                     | $1.03 \pm 0.26$                                    | $1.42 \pm 0.40$                                     | 0.72                                                                                    |
|                        | 40.3                                                     | $1.02 \pm 0.11$                                    | $1.40 \pm 0.06$                                     | 1.02                                                                                    |

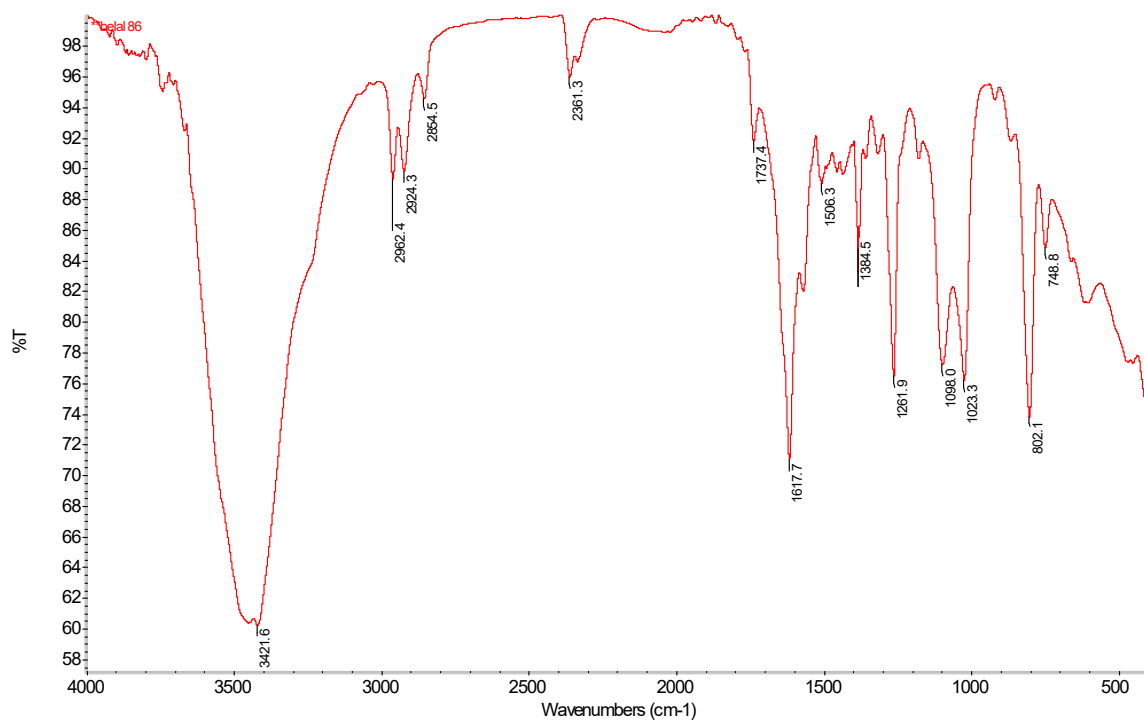

Figure S1. Infrared spectrum (KBr) of 3a.

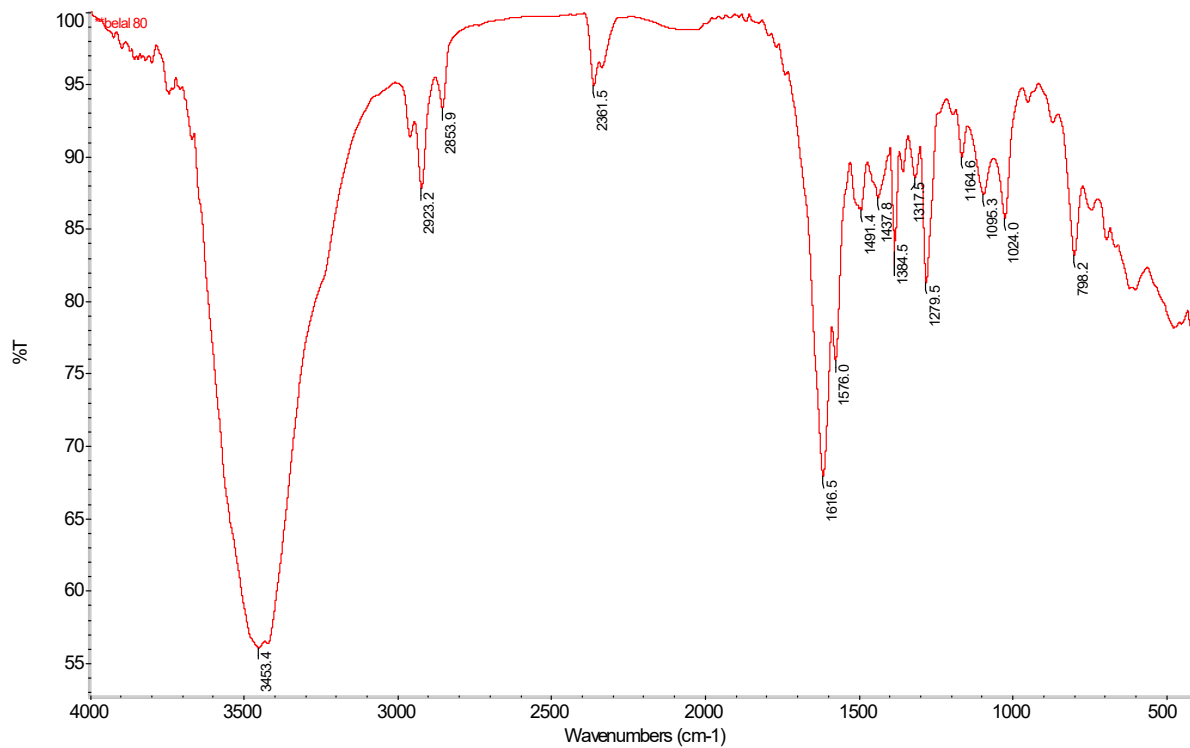

Figure S2. Infrared spectrum (KBr) of 3b.

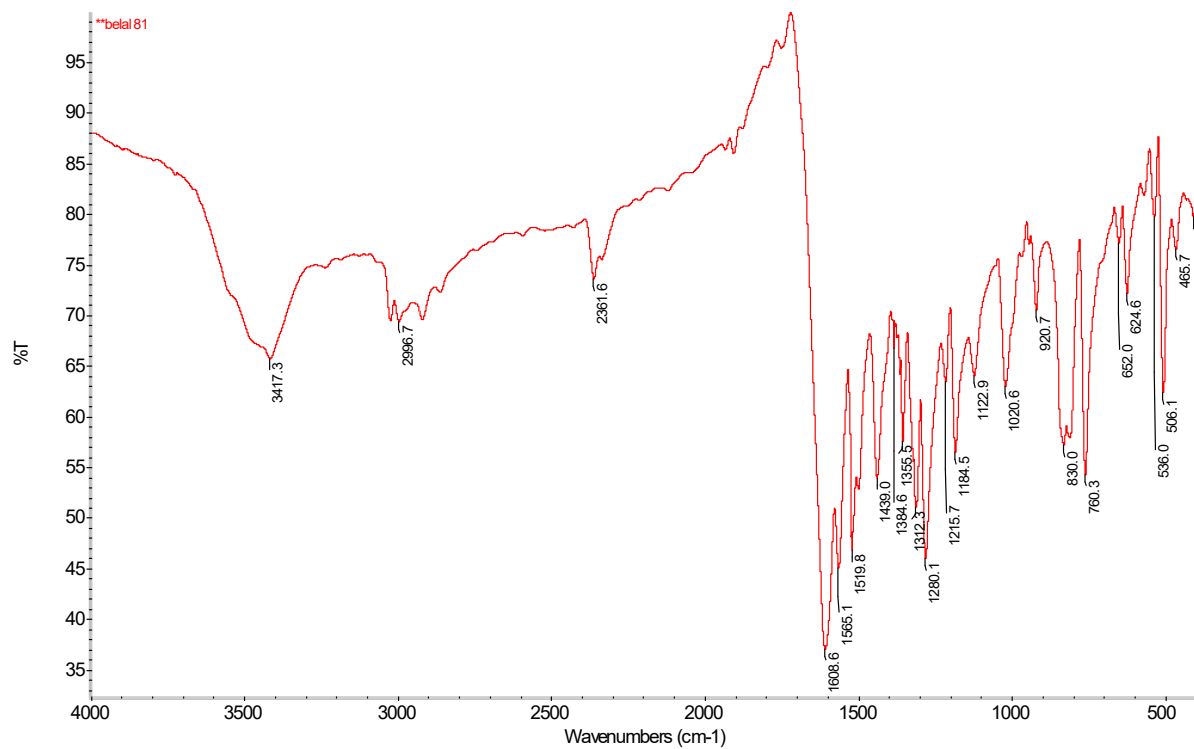

Figure S3. Infrared spectrum (KBr) of 3c.

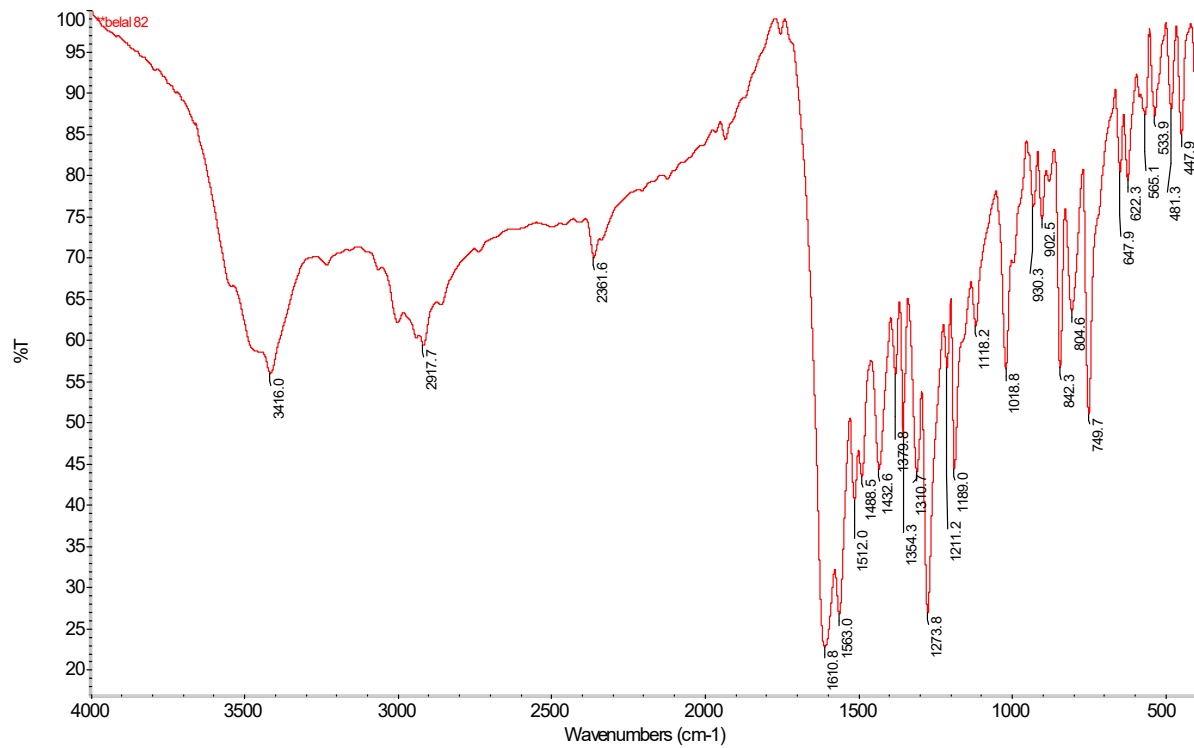

Figure S4. Infrared spectrum (KBr) of 3d.

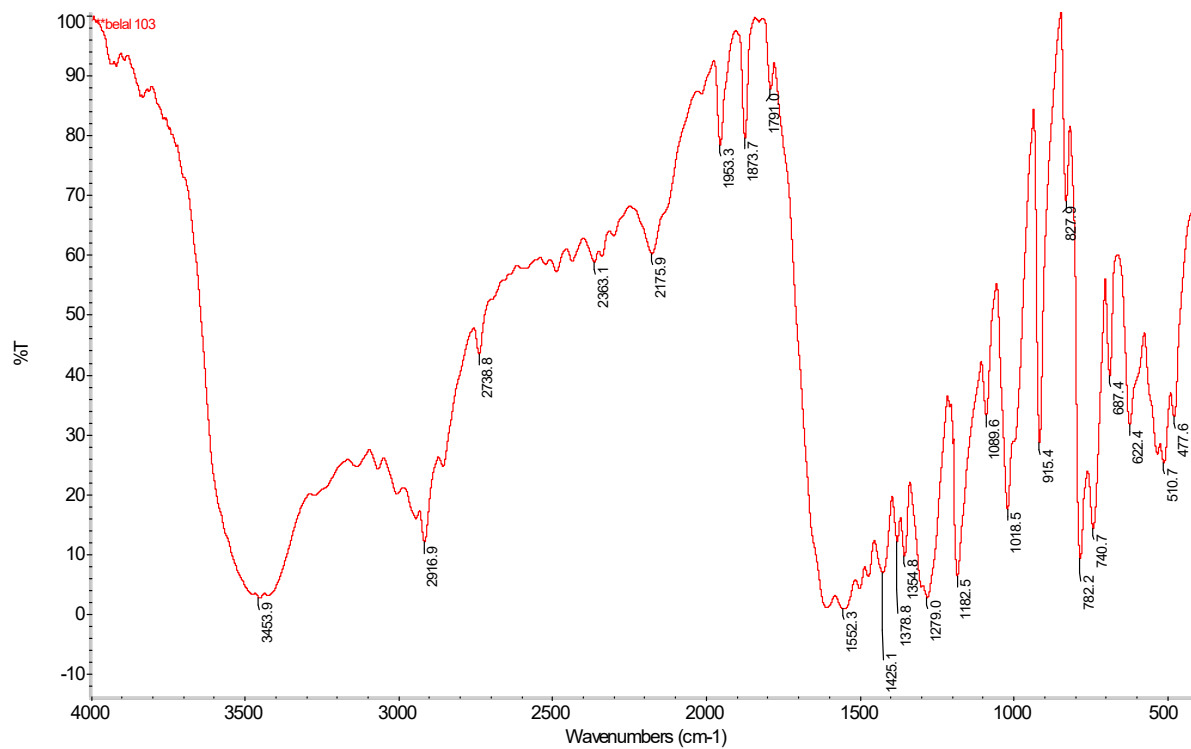

Figure S5. Infrared spectrum (KBr) of **3e**.

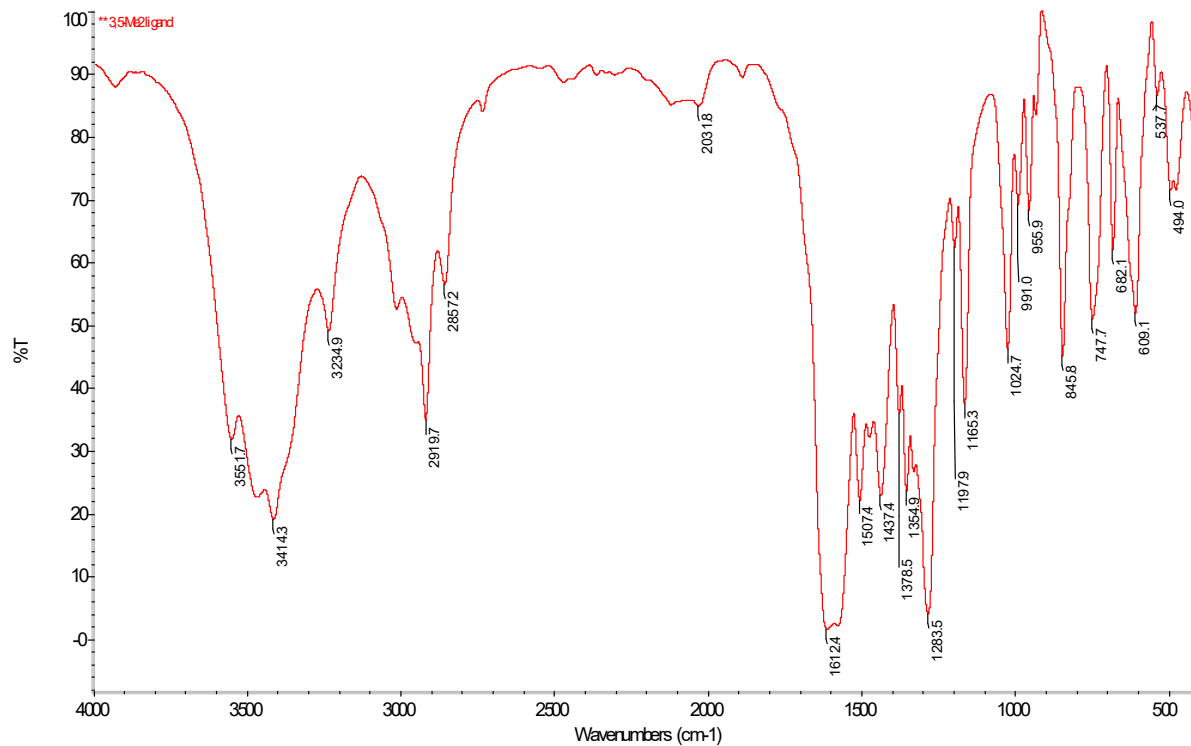

Figure S6. Infrared spectrum (KBr) of **3f**.

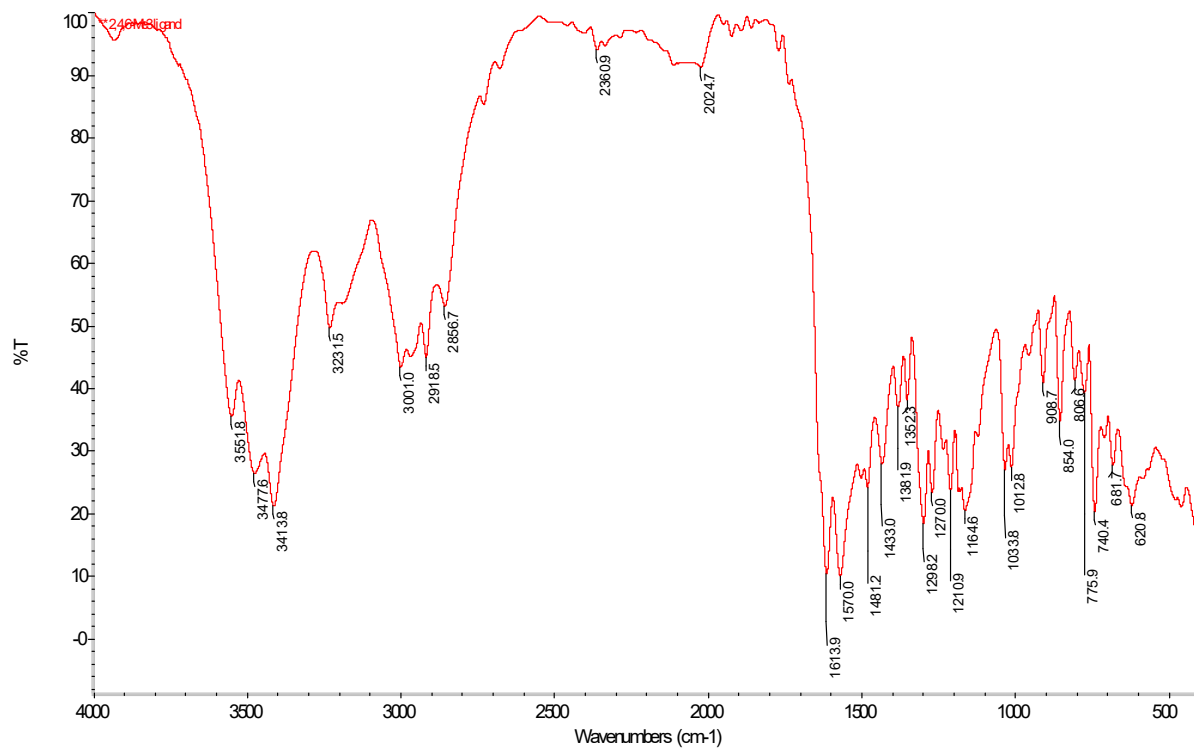

Figure S7. Infrared spectrum (KBr) of 3g.

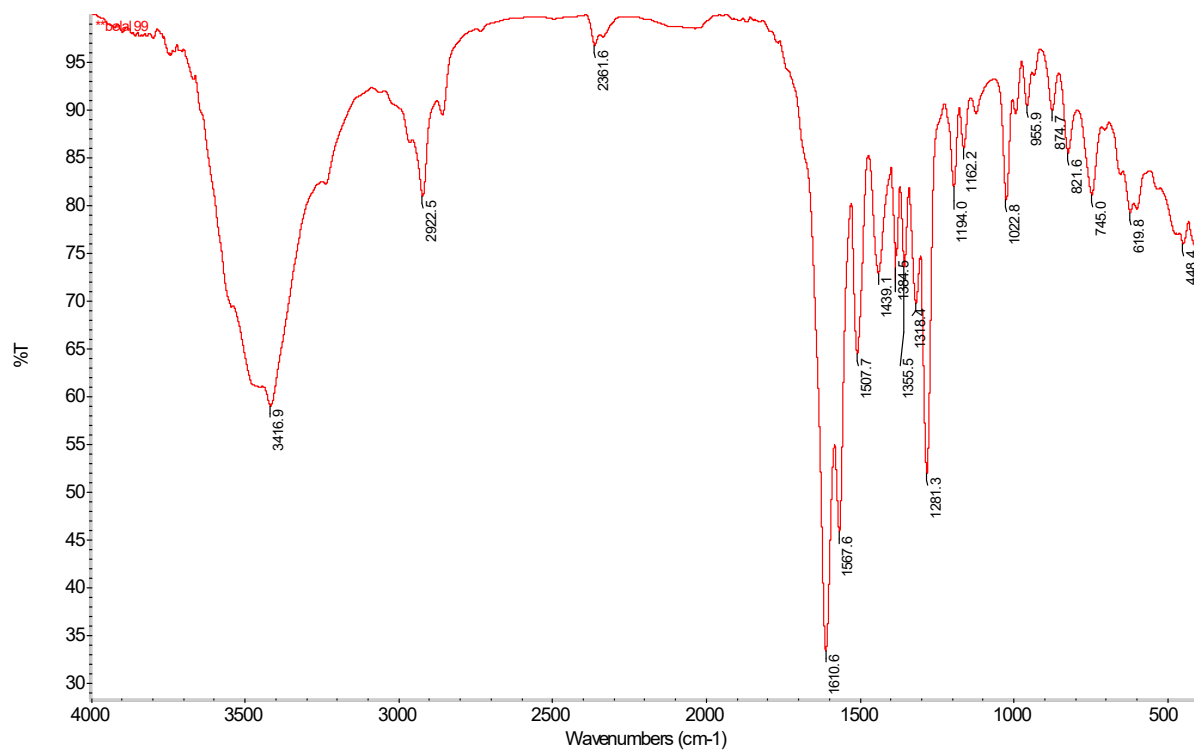

Figure S8. Infrared spectrum (KBr) of 3h.

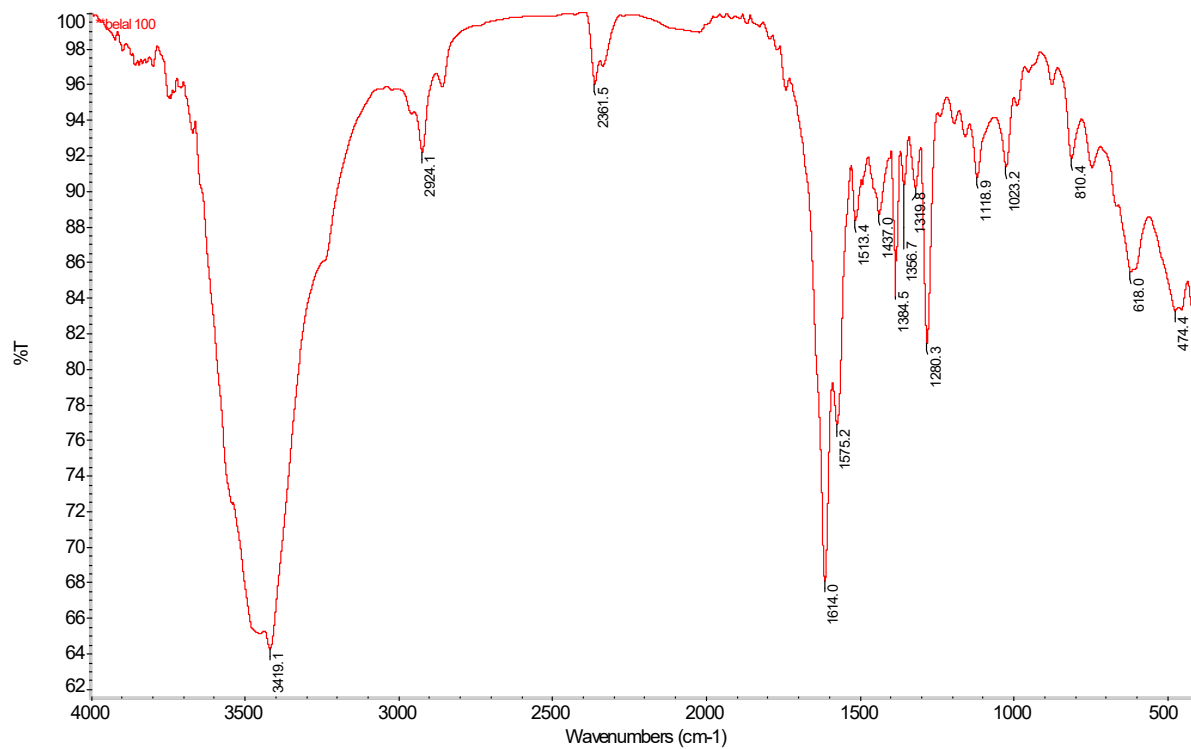

Figure S9. Infrared spectrum (KBr) of **3i**.

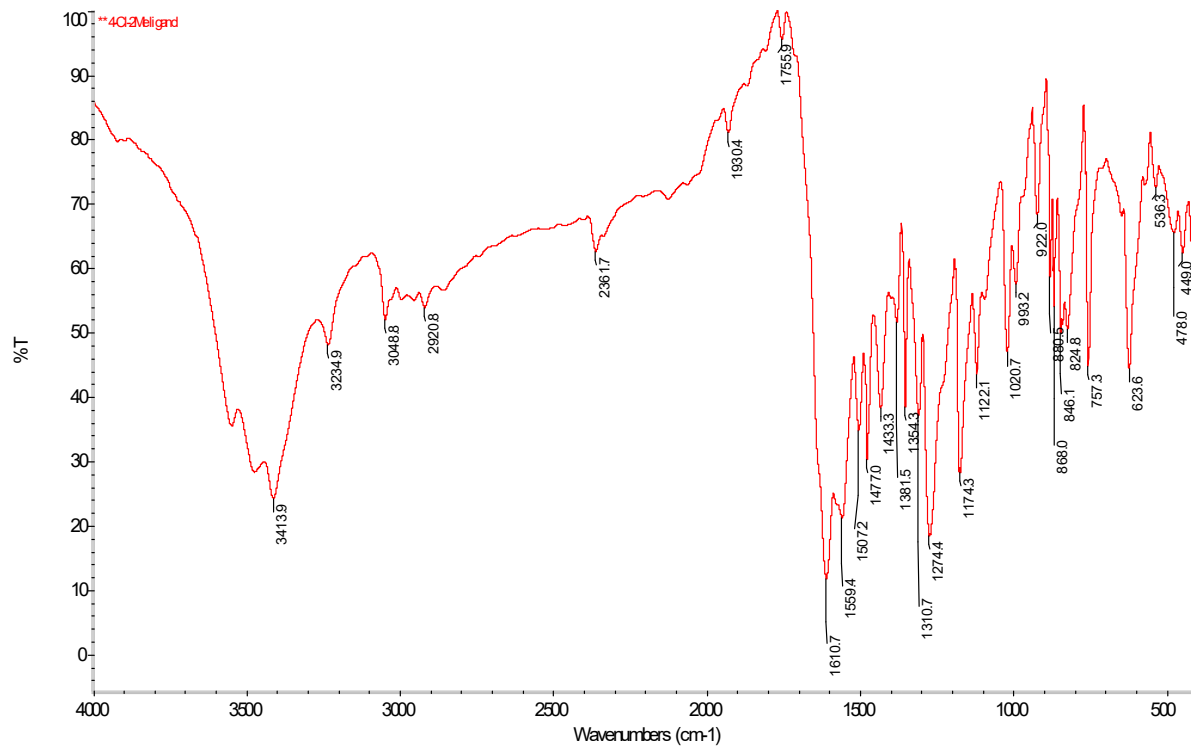

Figure S10. Infrared spectrum (KBr) of **3j**.

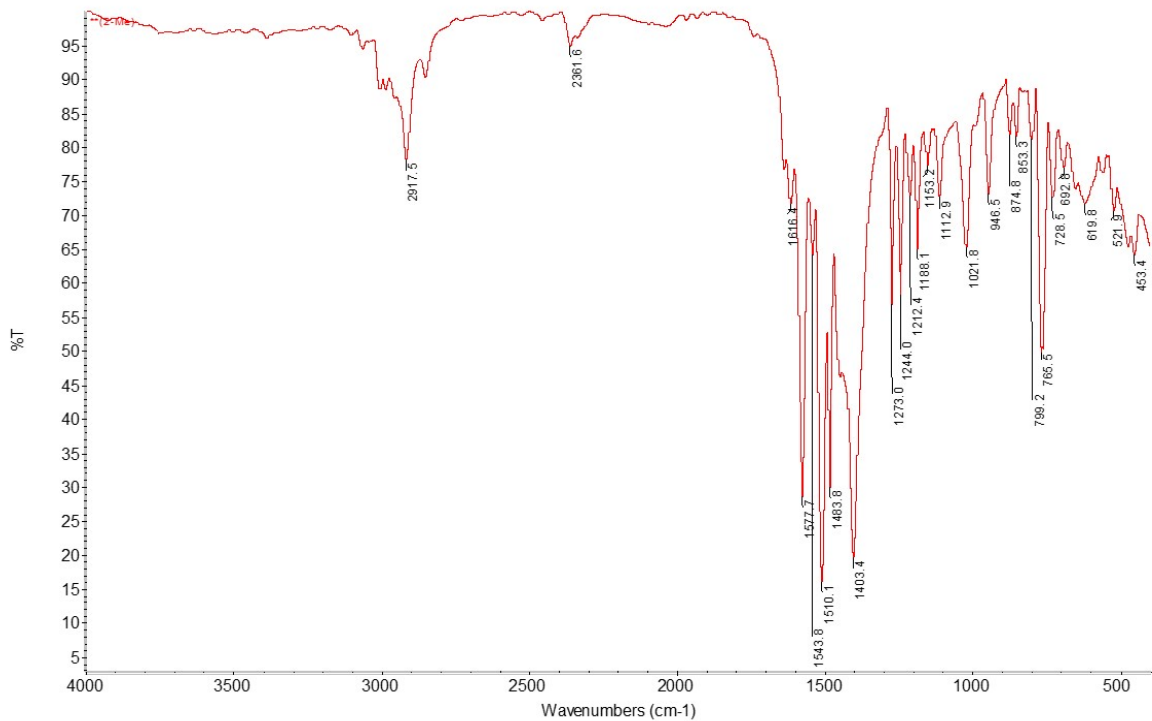

Figure S11. Infrared spectrum (KBr) of 4a.

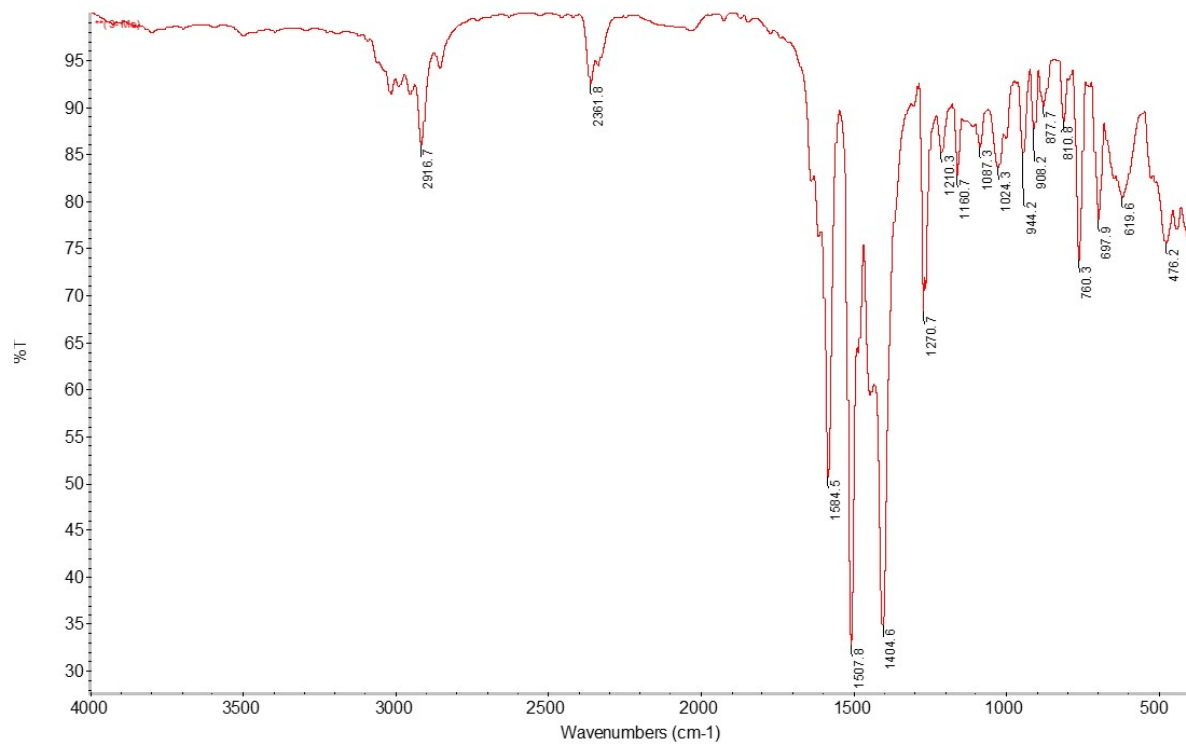

Figure S12. Infrared spectrum (KBr) of 4b.

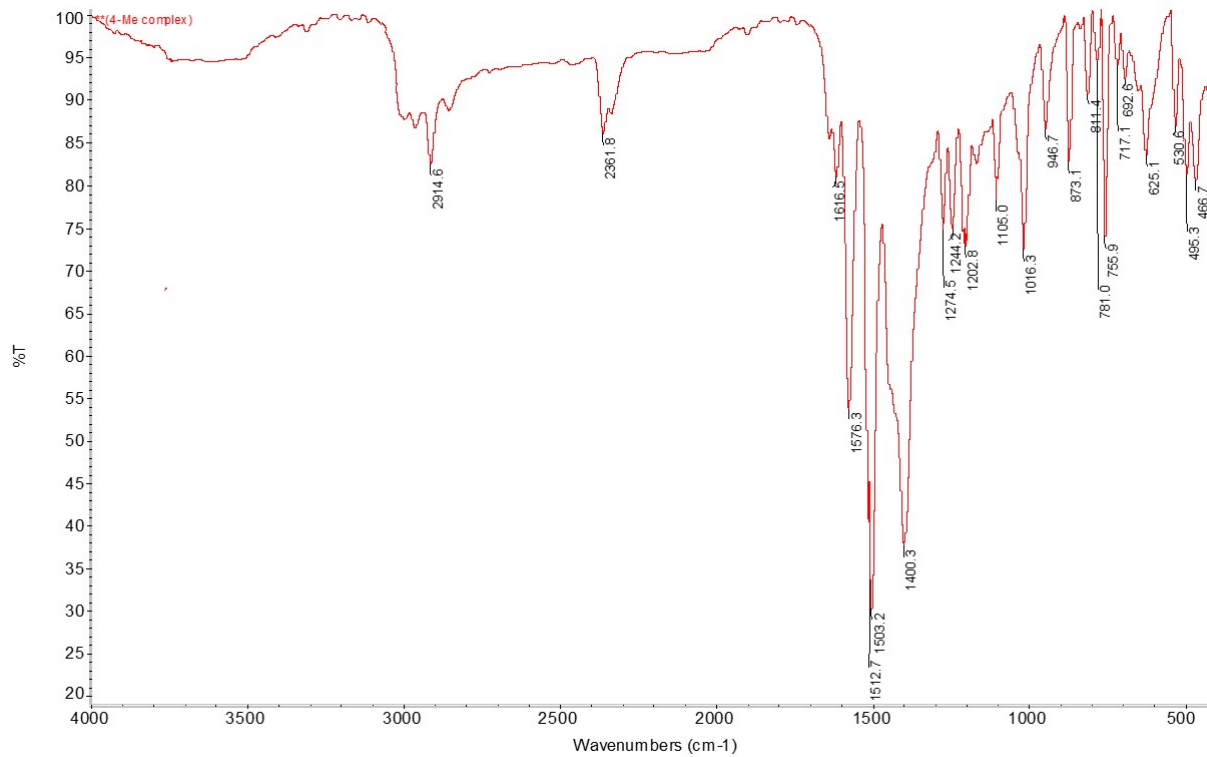

Figure S13. Infrared spectrum (KBr) of 4c

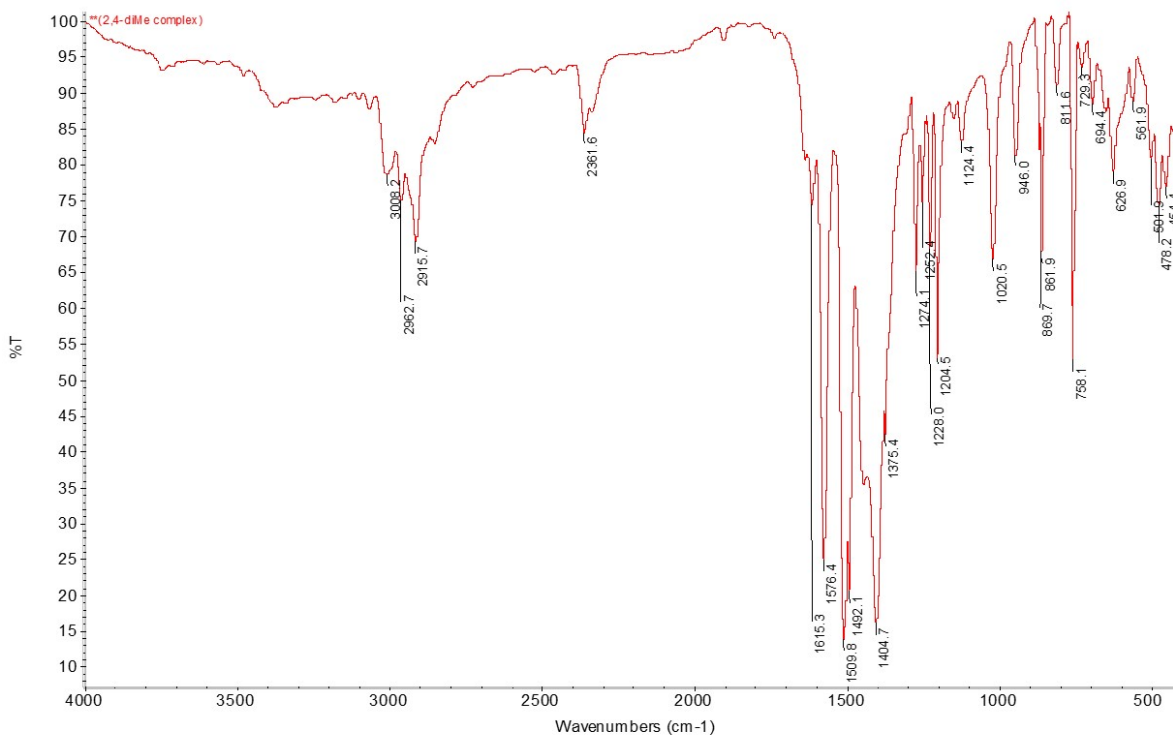

Figure S14. Infrared spectrum (KBr) of 4d.

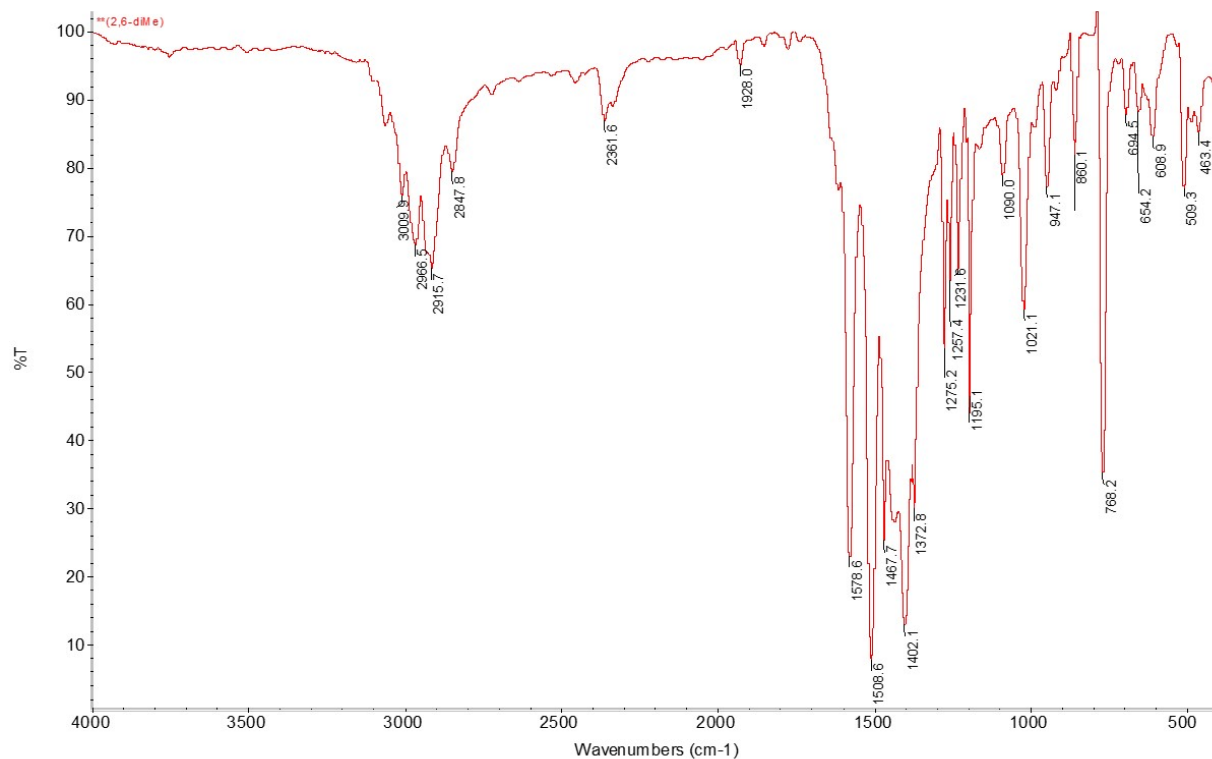

Figure S15. Infrared spectrum (KBr) of 4e.

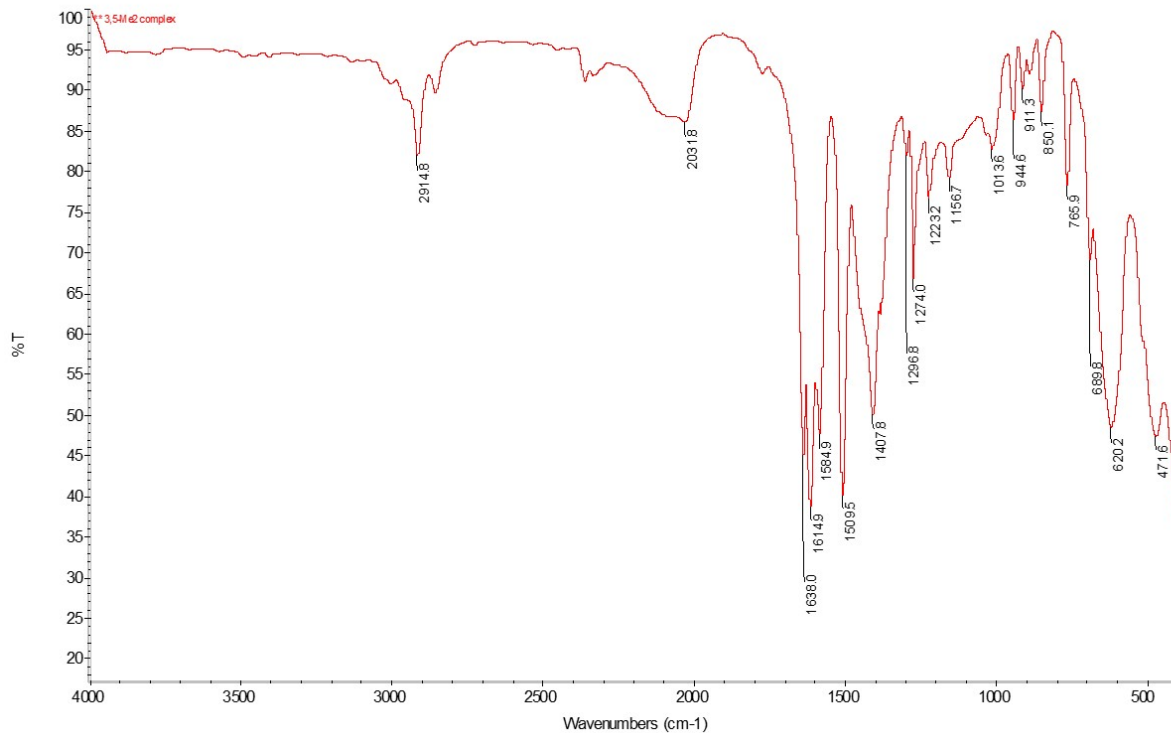

Figure S16. Infrared spectrum (KBr) of 4f.

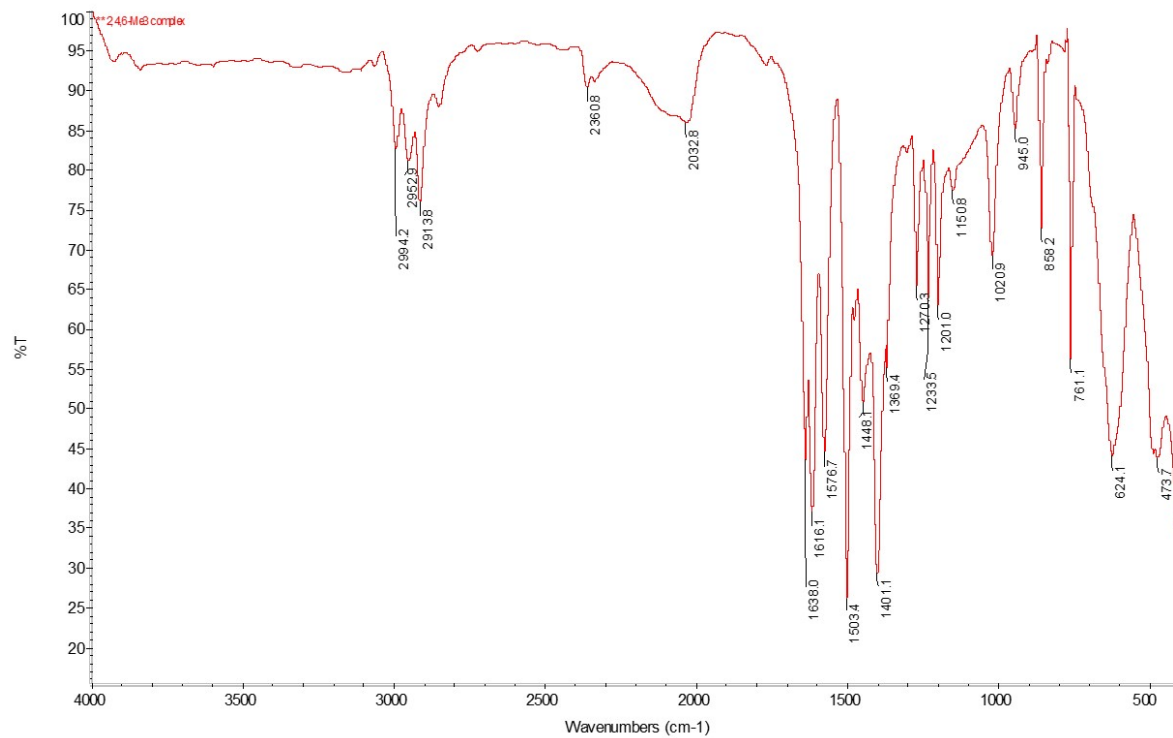

Figure S17. Infrared spectrum (KBr) of 4g.

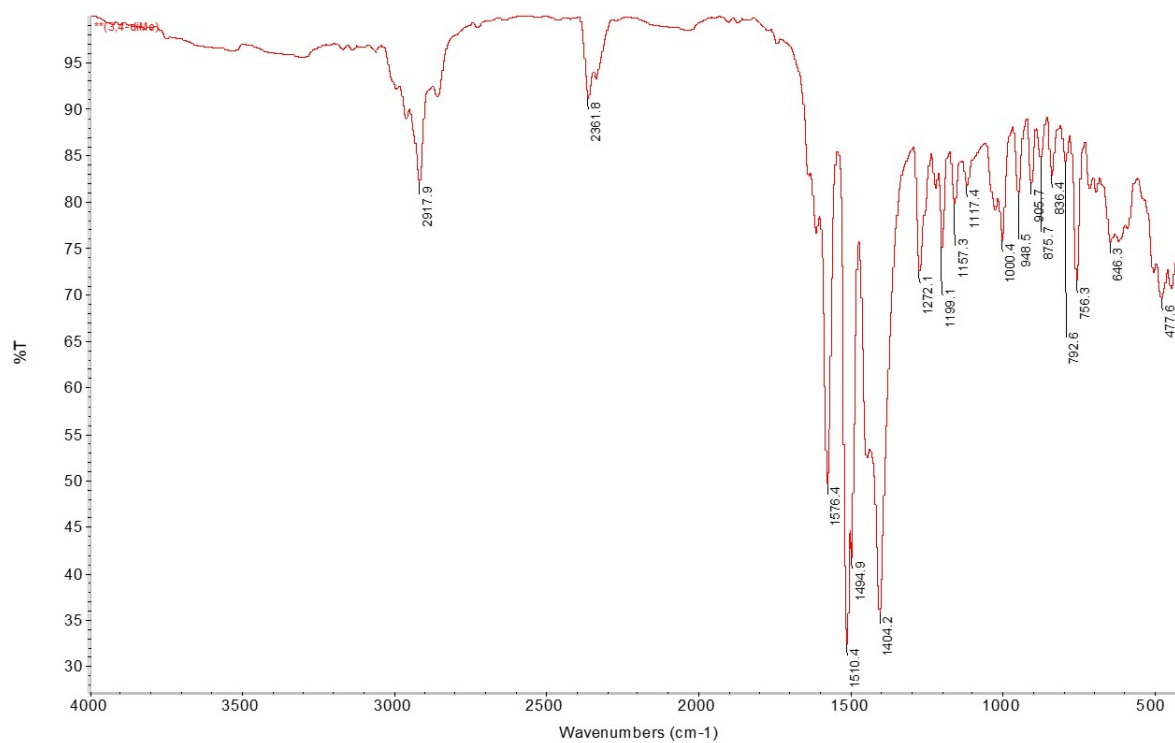

Figure S18. Infrared spectrum (KBr) of 4h.

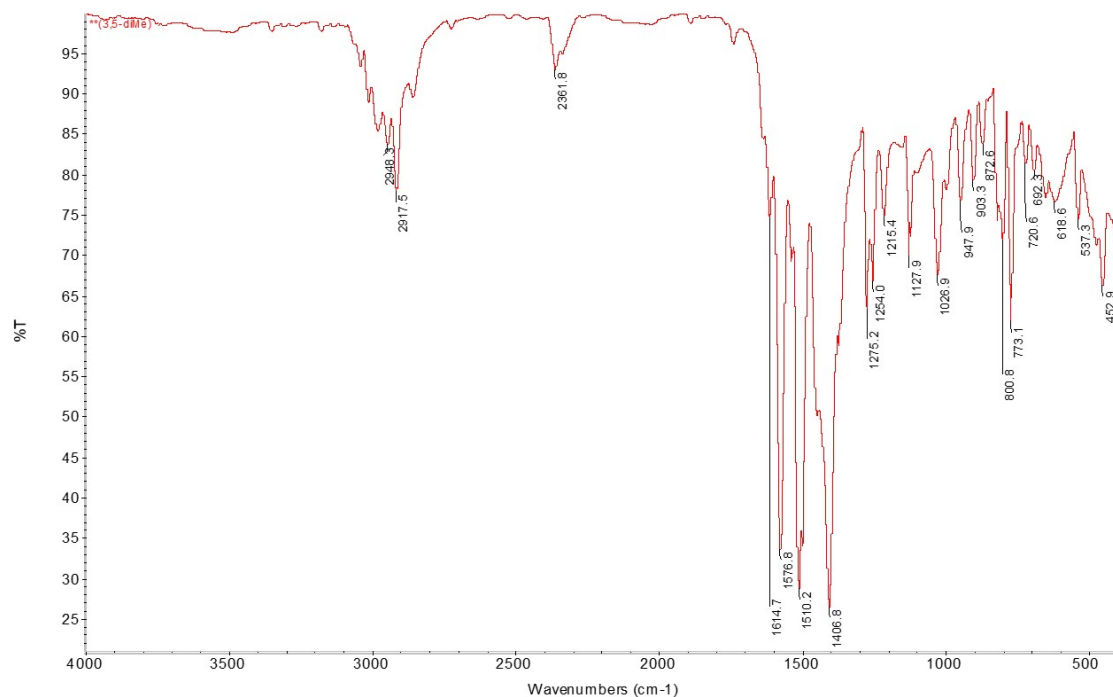

Figure S19. Infrared spectrum (KBr) of 4i.

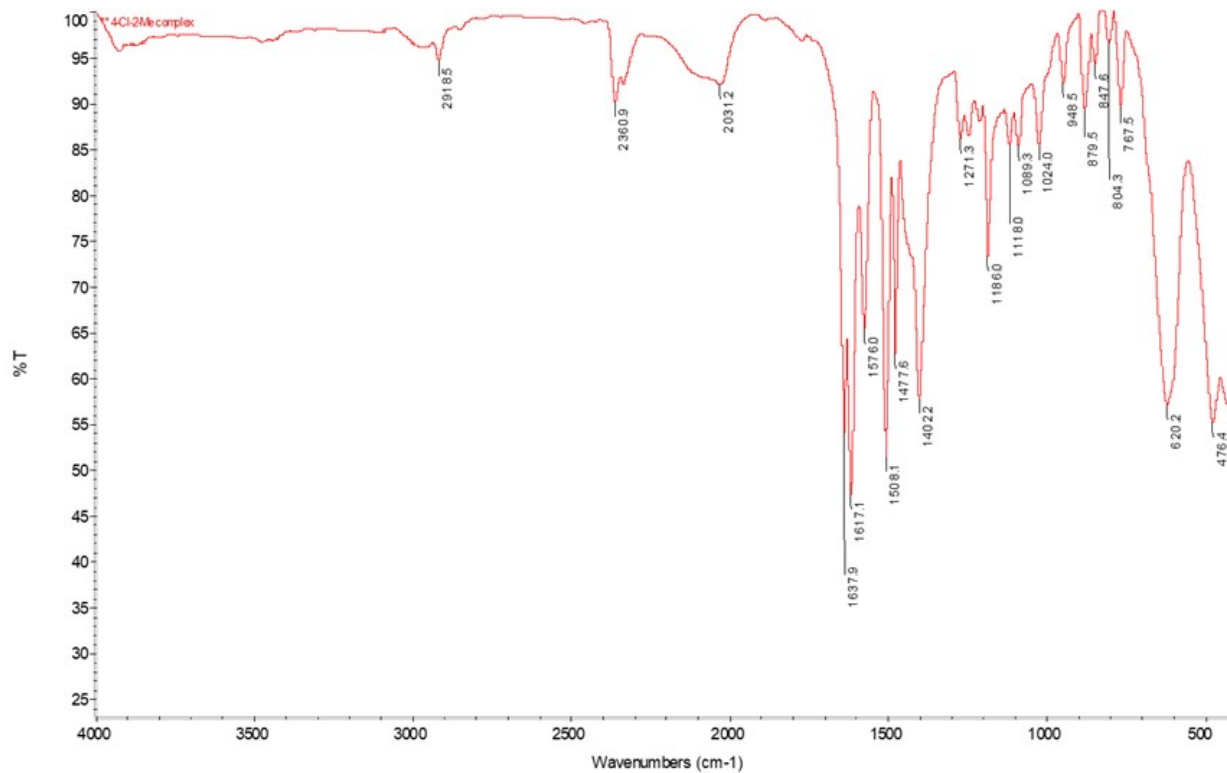

Figure S20. Infrared spectrum (KBr) of 4j.

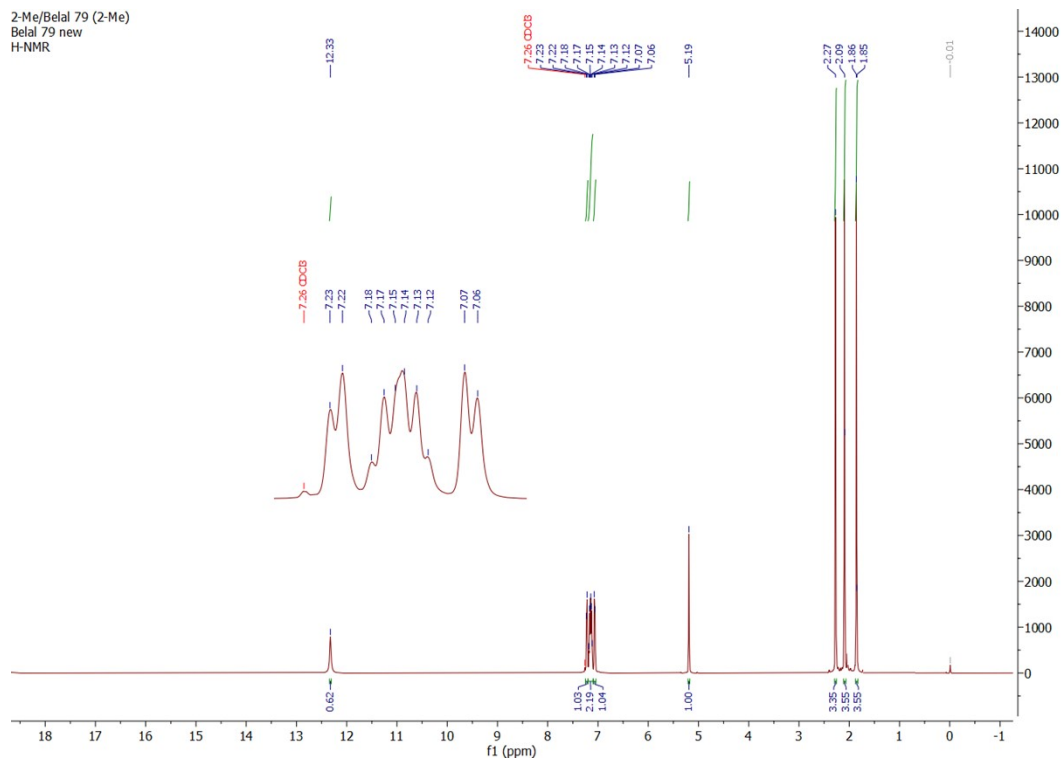

Figure S21.  $^1\text{H}$  NMR spectrum ( $\text{CDCl}_3$ , 25  $^\circ\text{C}$ , 500.303 MHz) of **3a**.

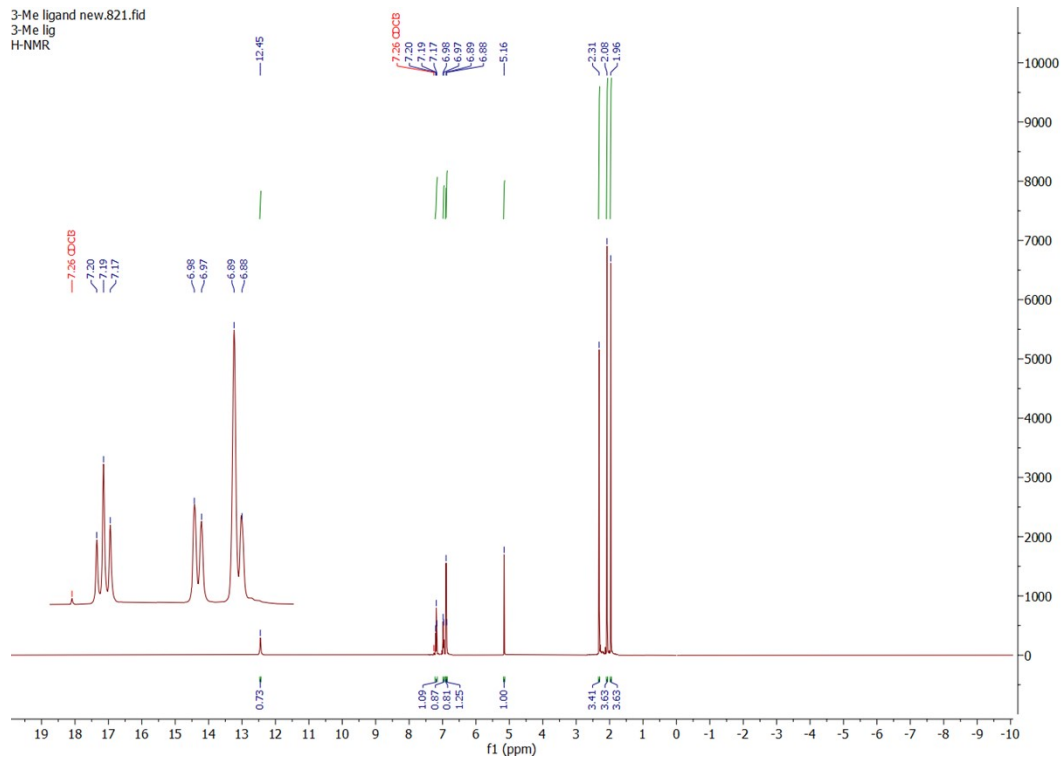

Figure S22.  $^1\text{H}$  NMR spectrum ( $\text{CDCl}_3$ , 25  $^\circ\text{C}$ , 500.303 MHz) of **3b**.

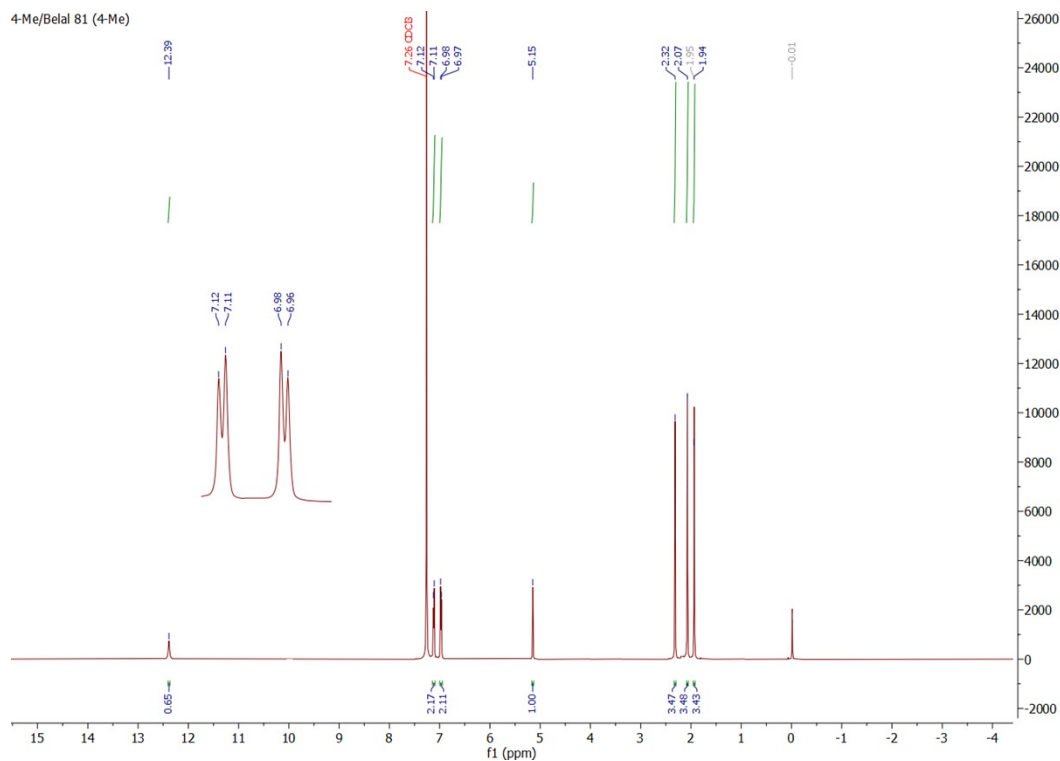

**Figure S23.** <sup>1</sup>H NMR spectrum (CDCl<sub>3</sub>, 25 °C, 500.303 MHz) of **3c**.

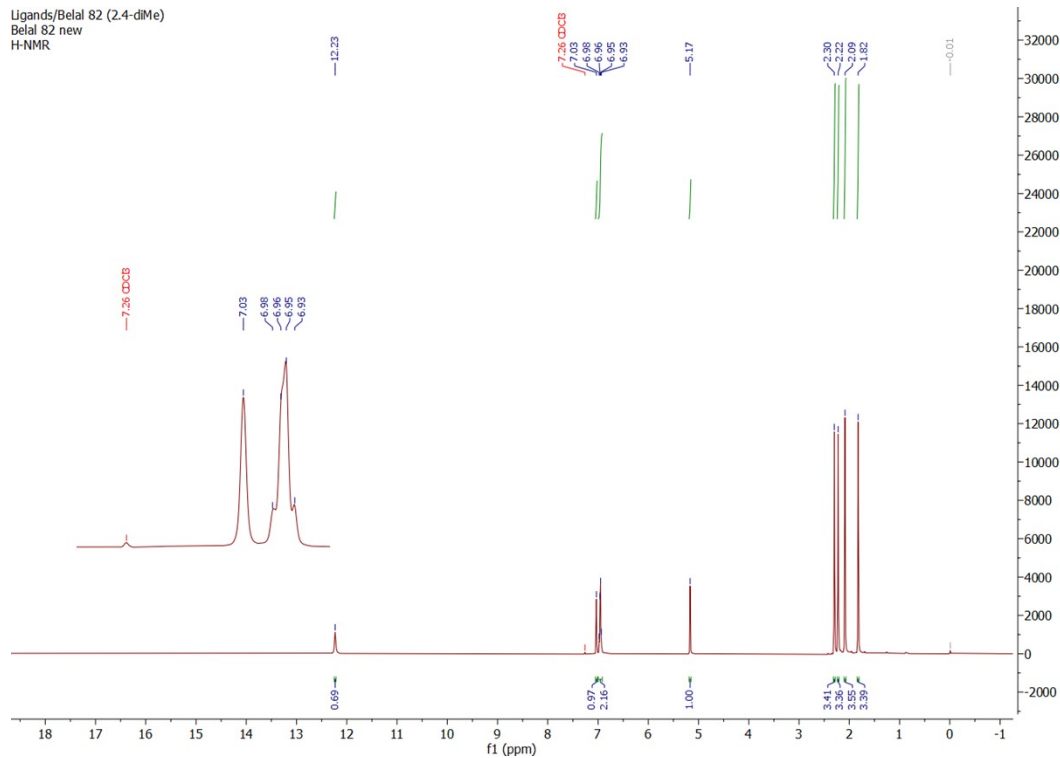

**Figure S24.** <sup>1</sup>H NMR spectrum (CDCl<sub>3</sub>, 25 °C, 500.303 MHz) of **3d**.

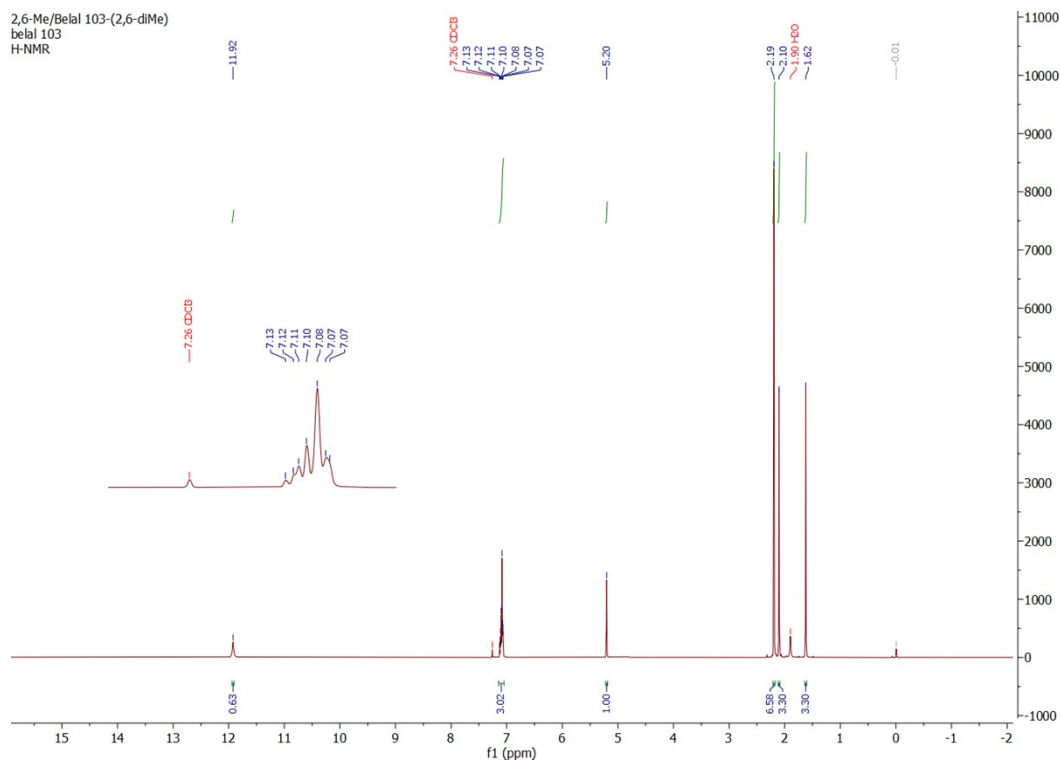

**Figure S25.**  $^1\text{H}$  NMR spectrum ( $\text{CDCl}_3$ , 25  $^\circ\text{C}$ , 500.303 MHz) of **3e**.

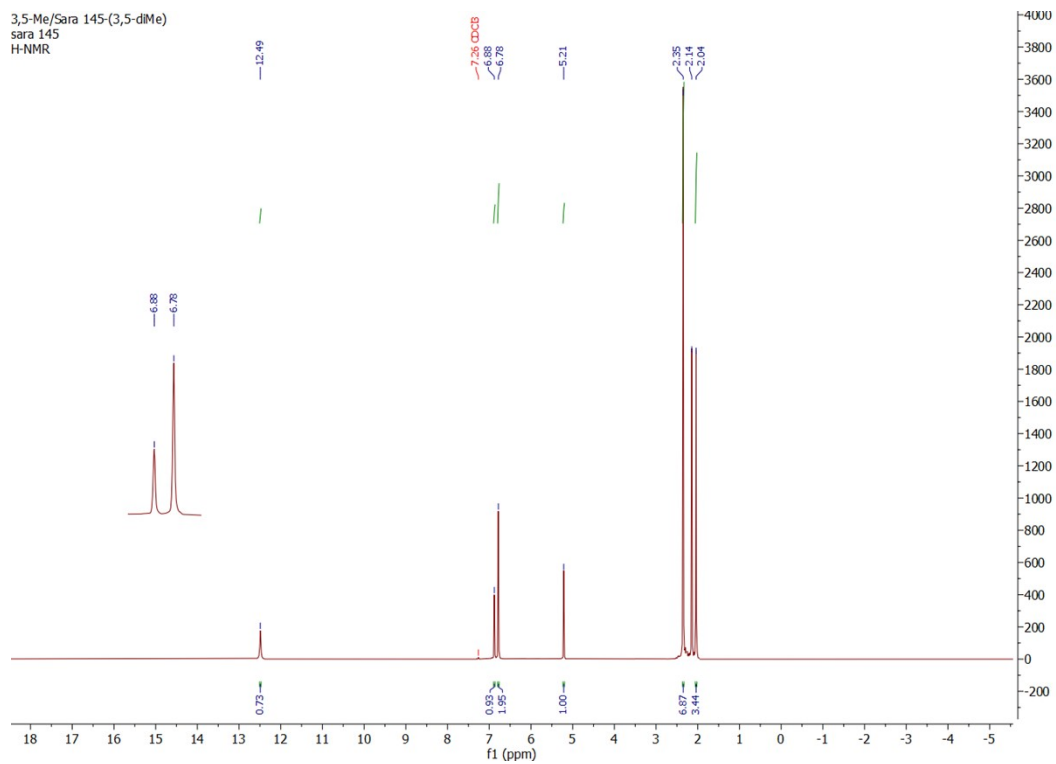

**Figure S26.**  $^1\text{H}$  NMR spectrum ( $\text{CDCl}_3$ , 25  $^\circ\text{C}$ , 500.303 MHz) of **3f**.

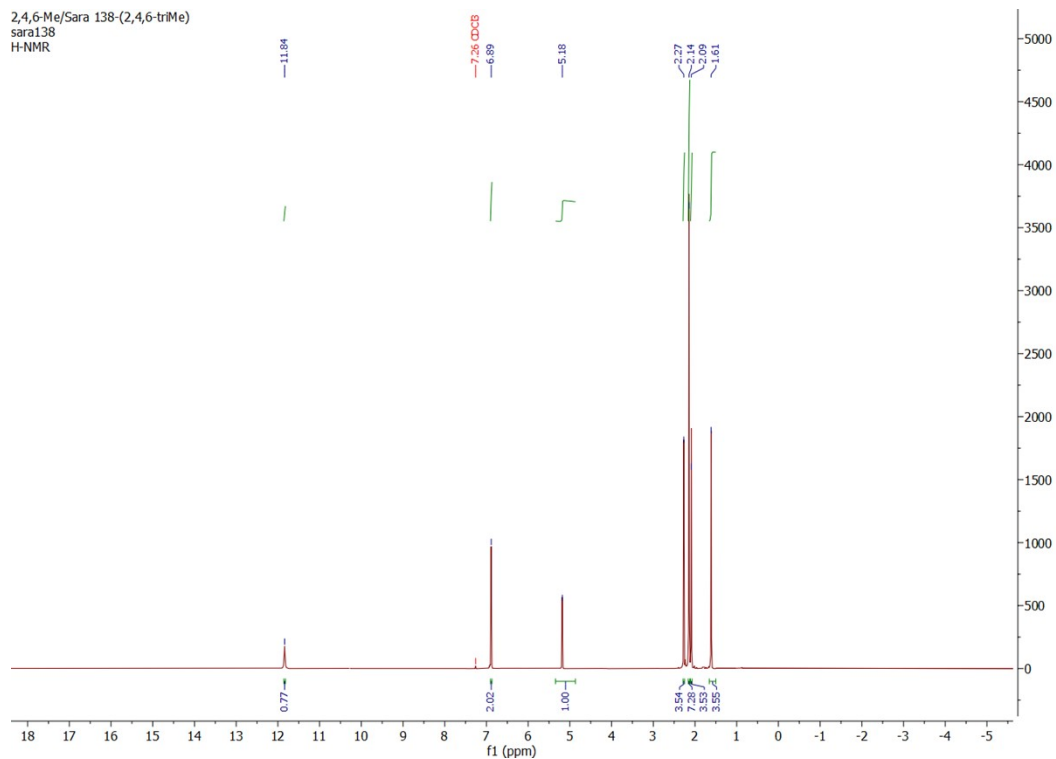

**Figure S27.** <sup>1</sup>H NMR spectrum (CDCl<sub>3</sub>, 25 °C, 500.303 MHz) of **3g**.

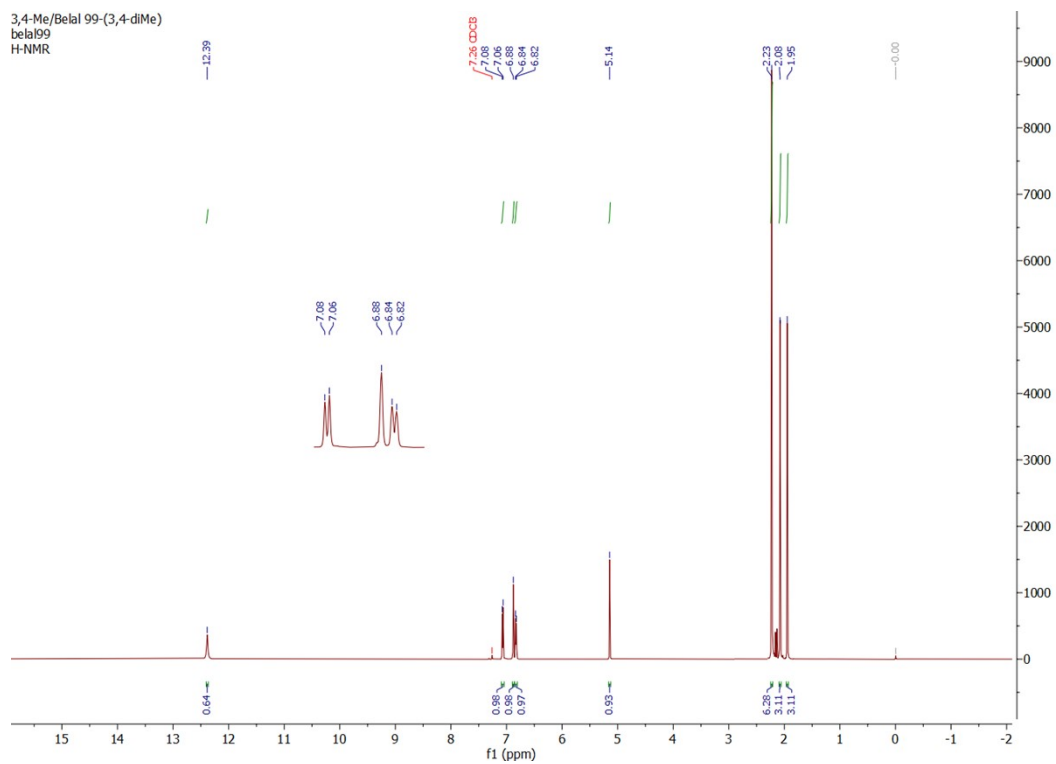

**Figure S28.** <sup>1</sup>H NMR spectrum (CDCl<sub>3</sub>, 25 °C, 500.303 MHz) of **3h**.

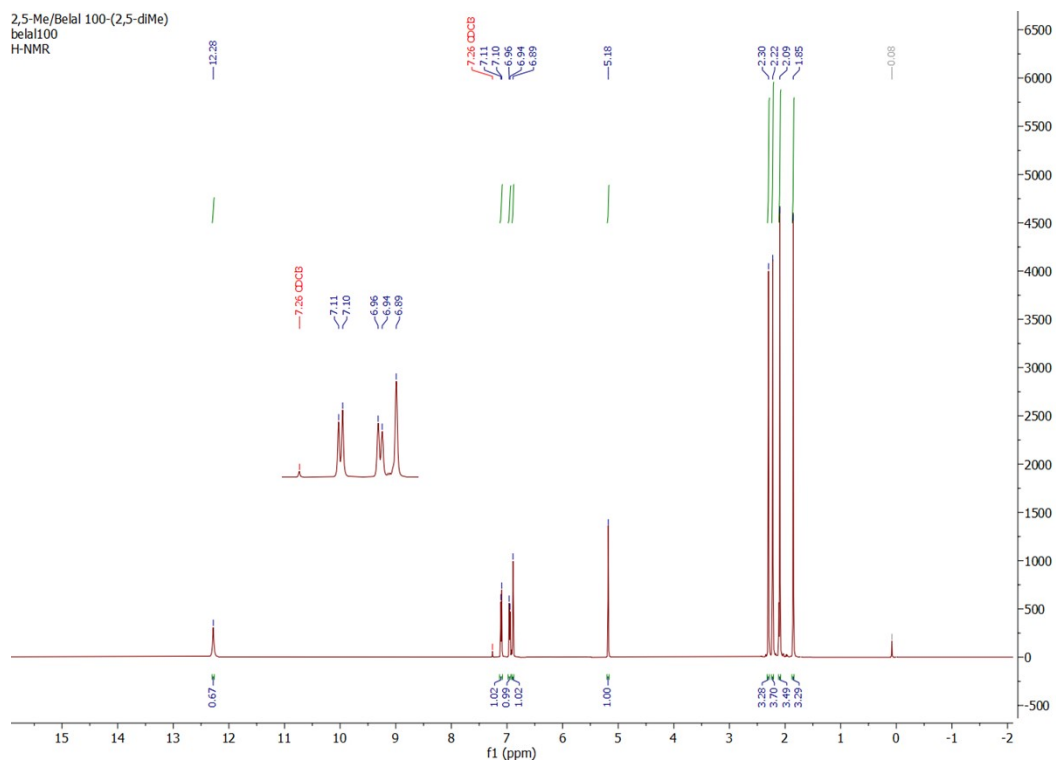

**Figure S29.**  $^1\text{H}$  NMR spectrum ( $\text{CDCl}_3$ , 25 °C, 500.303 MHz) of **3i**.

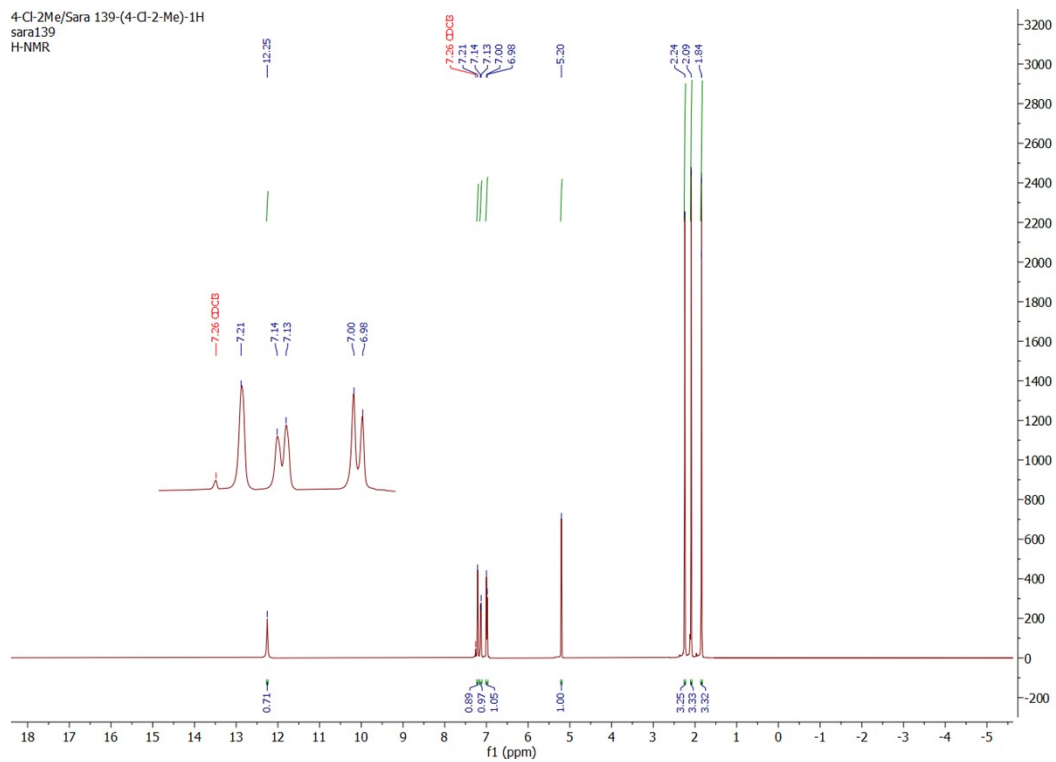

**Figure S30.**  $^1\text{H}$  NMR spectrum ( $\text{CDCl}_3$ , 25 °C, 500.303 MHz) of **3j**.

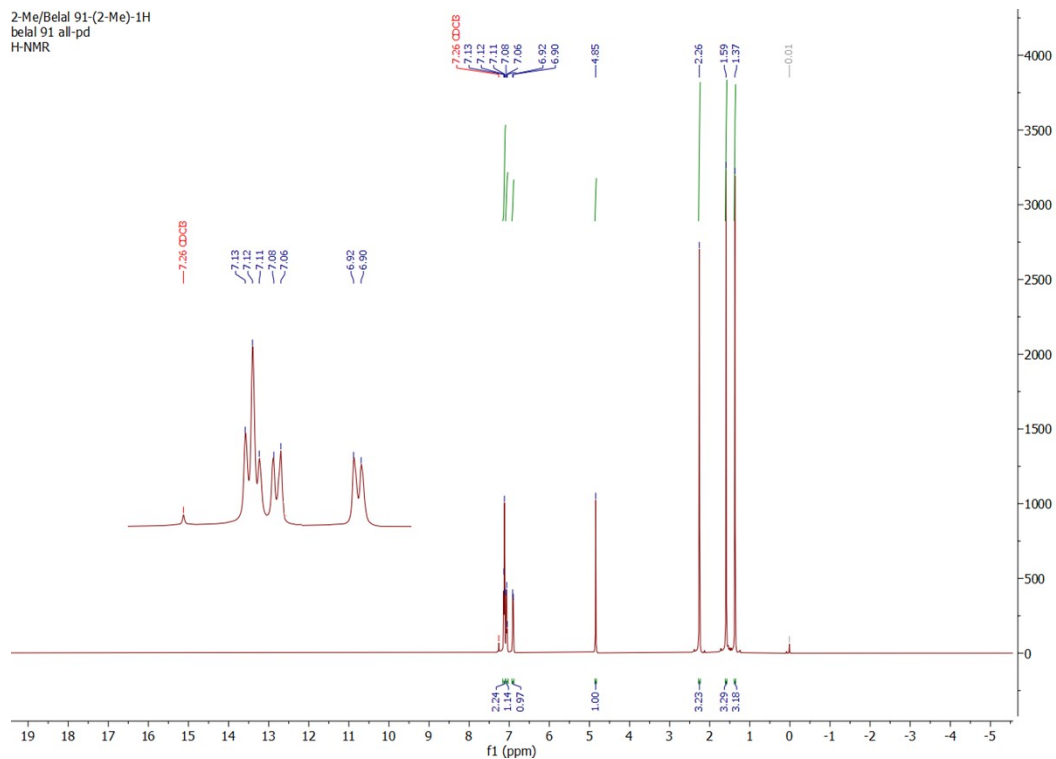

Figure S31.  $^1\text{H}$  NMR spectrum ( $\text{CDCl}_3$ , 25  $^\circ\text{C}$ , 500.303 MHz) of **4a**.

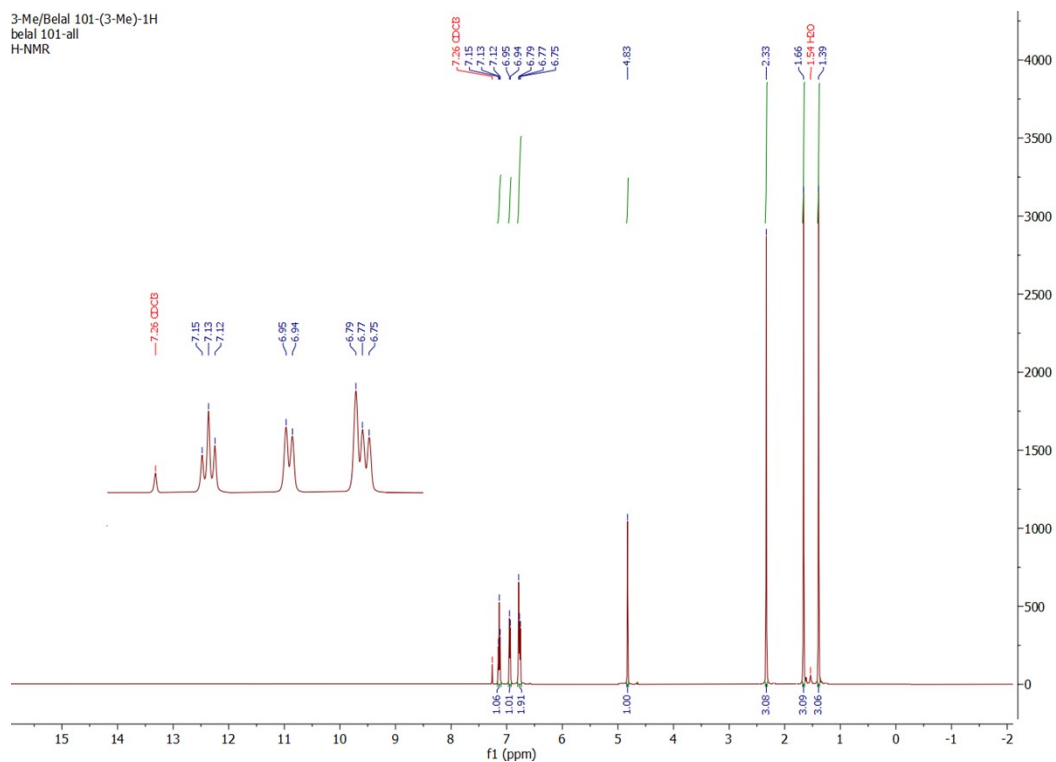

Figure S32.  $^1\text{H}$  NMR spectrum ( $\text{CDCl}_3$ , 25  $^\circ\text{C}$ , 500.303 MHz) of **4b**.

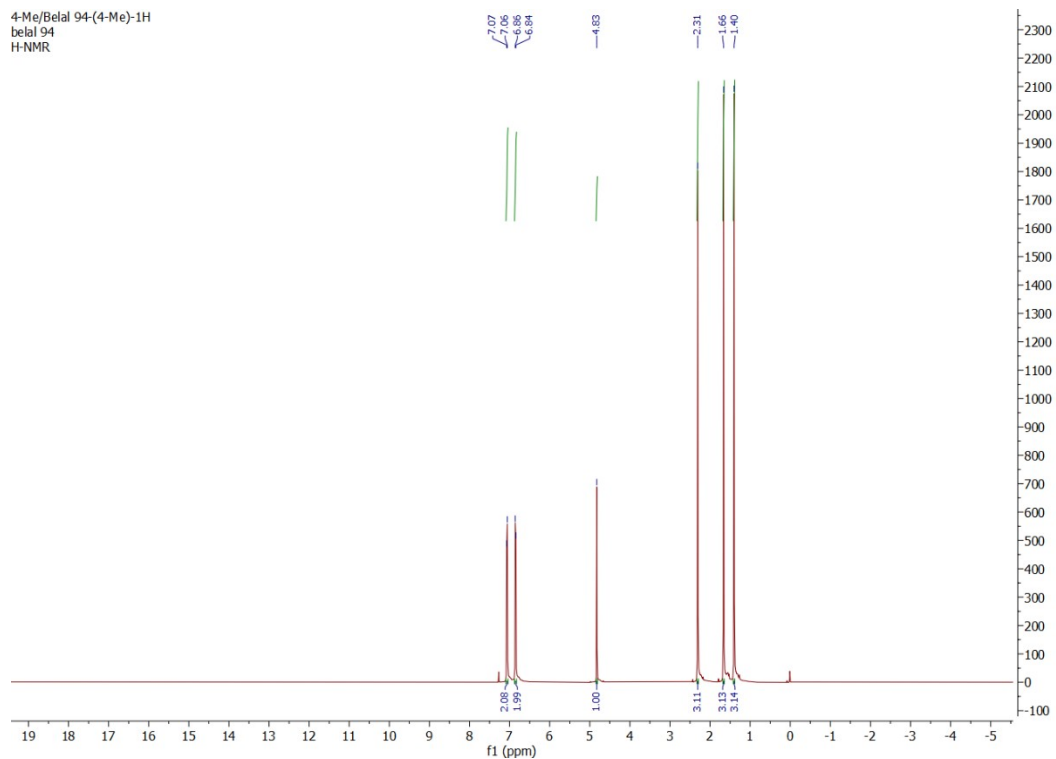

**Figure S33.**  $^1\text{H}$  NMR spectrum ( $\text{CDCl}_3$ , 25  $^\circ\text{C}$ , 500.303 MHz) of **4c**.

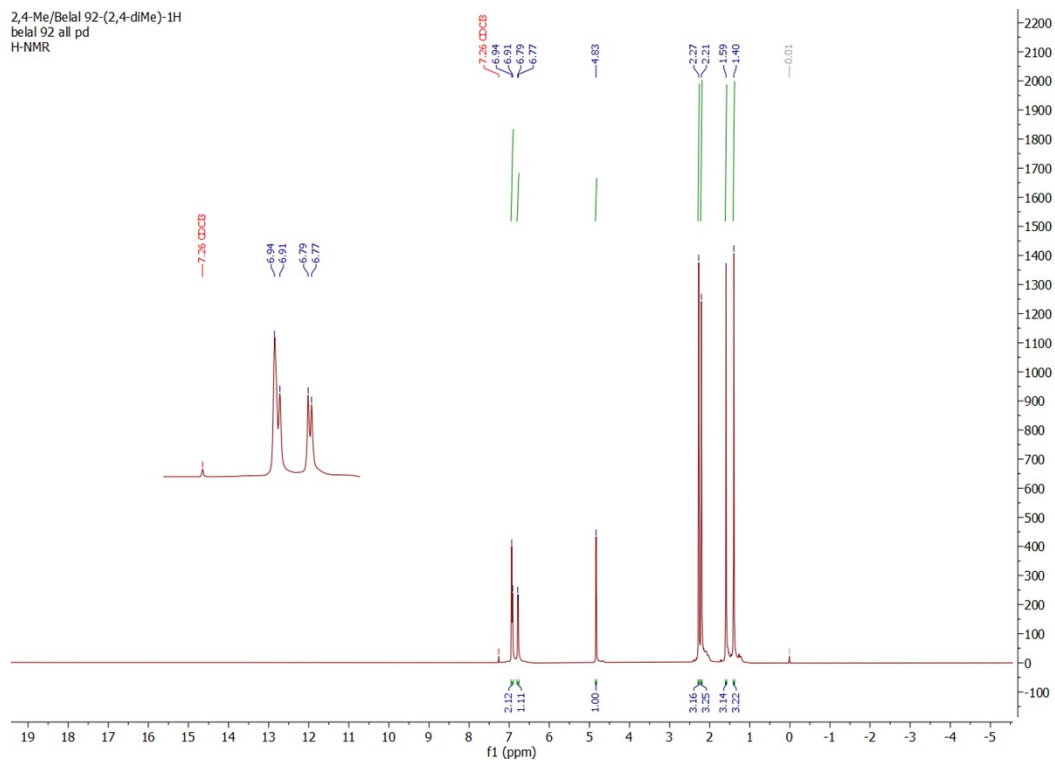

**Figure S34.**  $^1\text{H}$  NMR spectrum ( $\text{CDCl}_3$ , 25  $^\circ\text{C}$ , 500.303 MHz) of **4d**.

2,6-Me/Belal 206-(2,6-dMe)-1H  
belal206  
H-NMR

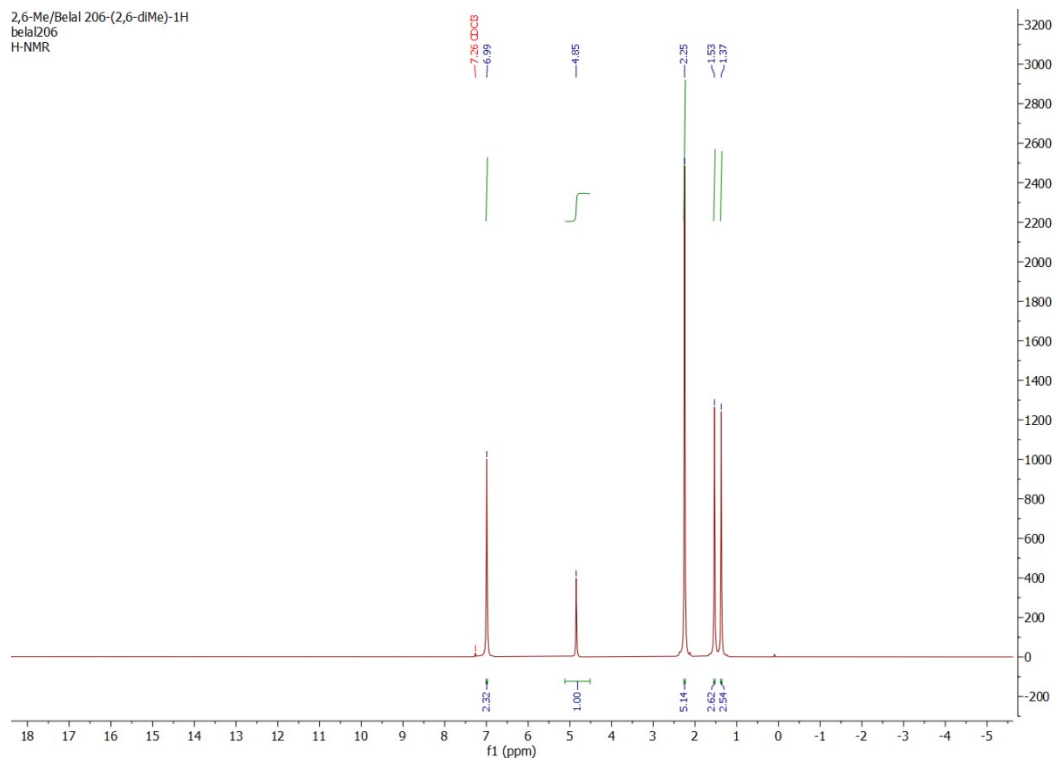

Figure S35. <sup>1</sup>H NMR spectrum (CDCl<sub>3</sub>, 25 °C, 500.303 MHz) of 4e.

3,5-Me/Sara 146-(3,5-dMe)-1H  
sara146  
H-NMR

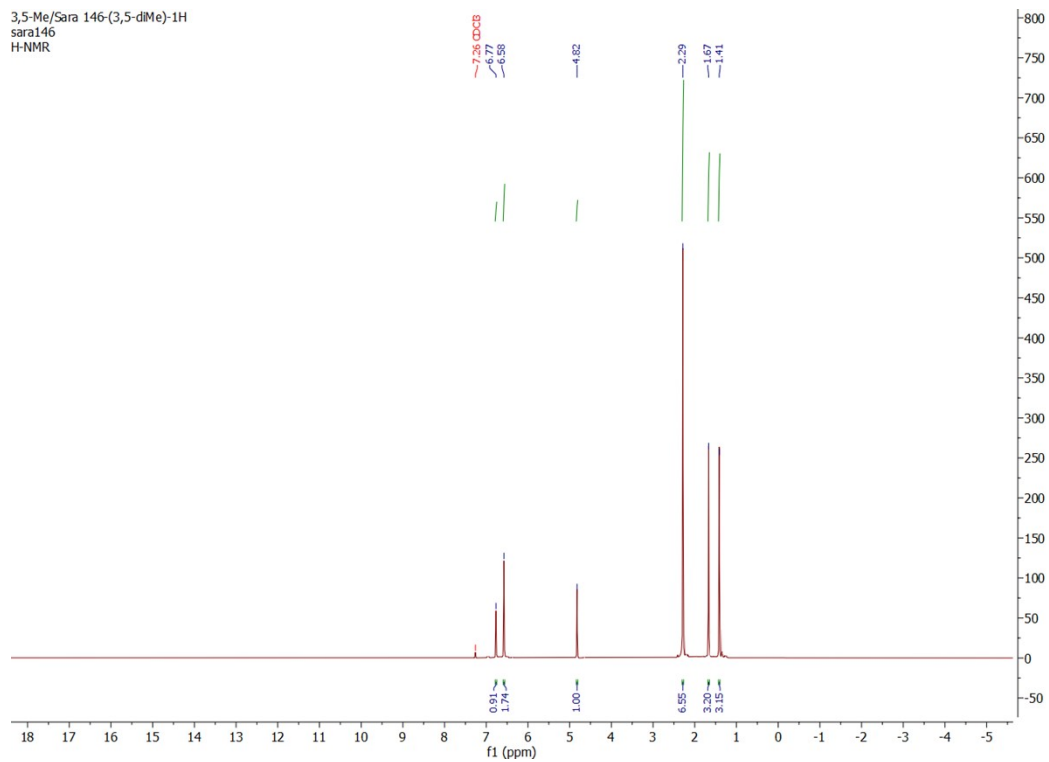

Figure S36. <sup>1</sup>H NMR spectrum (CDCl<sub>3</sub>, 25 °C, 500.303 MHz) of 4f.

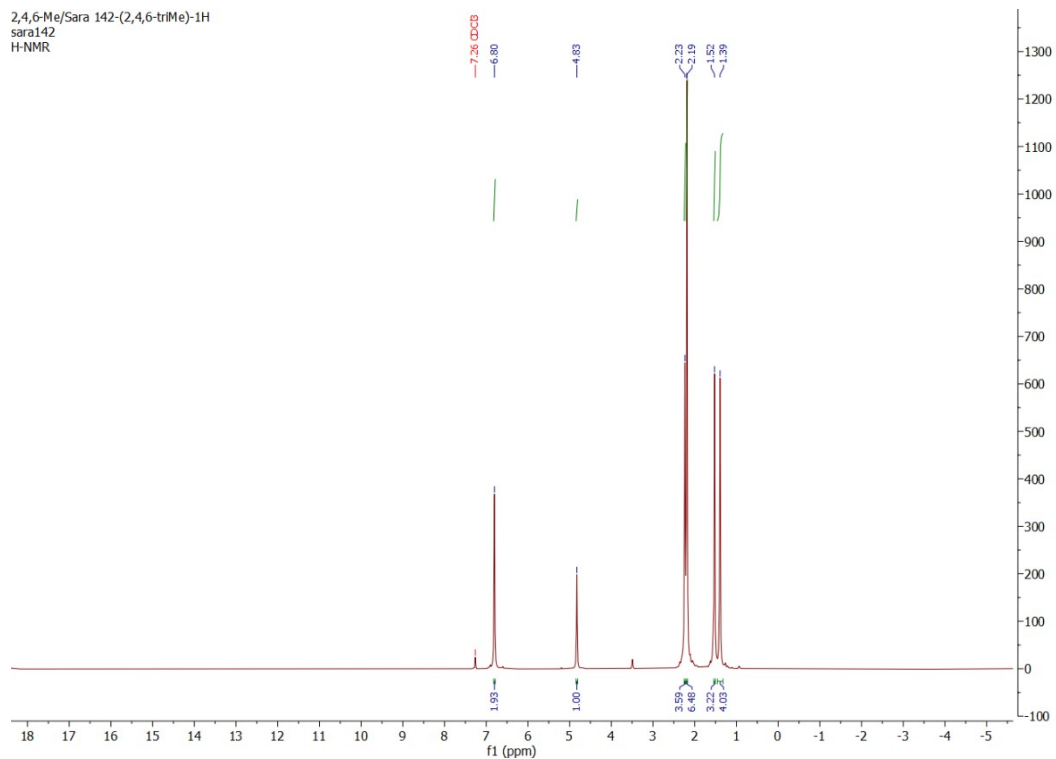

**Figure S37.**  $^1\text{H}$  NMR spectrum ( $\text{CDCl}_3$ , 25  $^\circ\text{C}$ , 500.303 MHz) of **4g**.

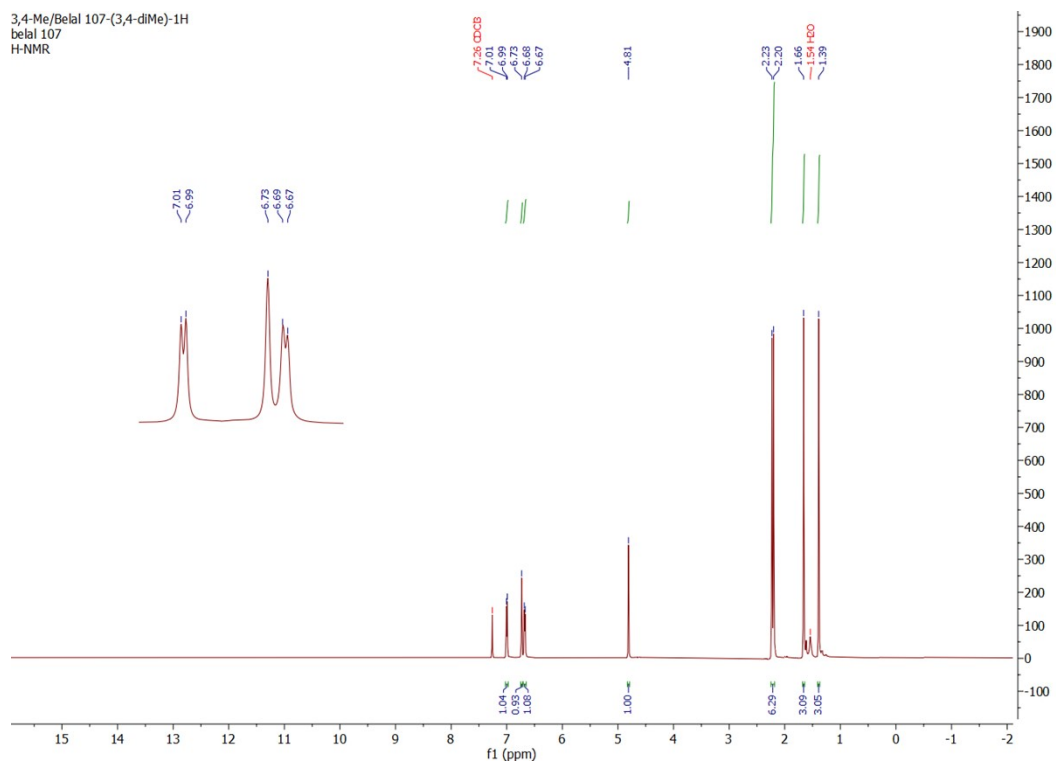

**Figure S38.**  $^1\text{H}$  NMR spectrum ( $\text{CDCl}_3$ , 25  $^\circ\text{C}$ , 500.303 MHz) of **4h**.

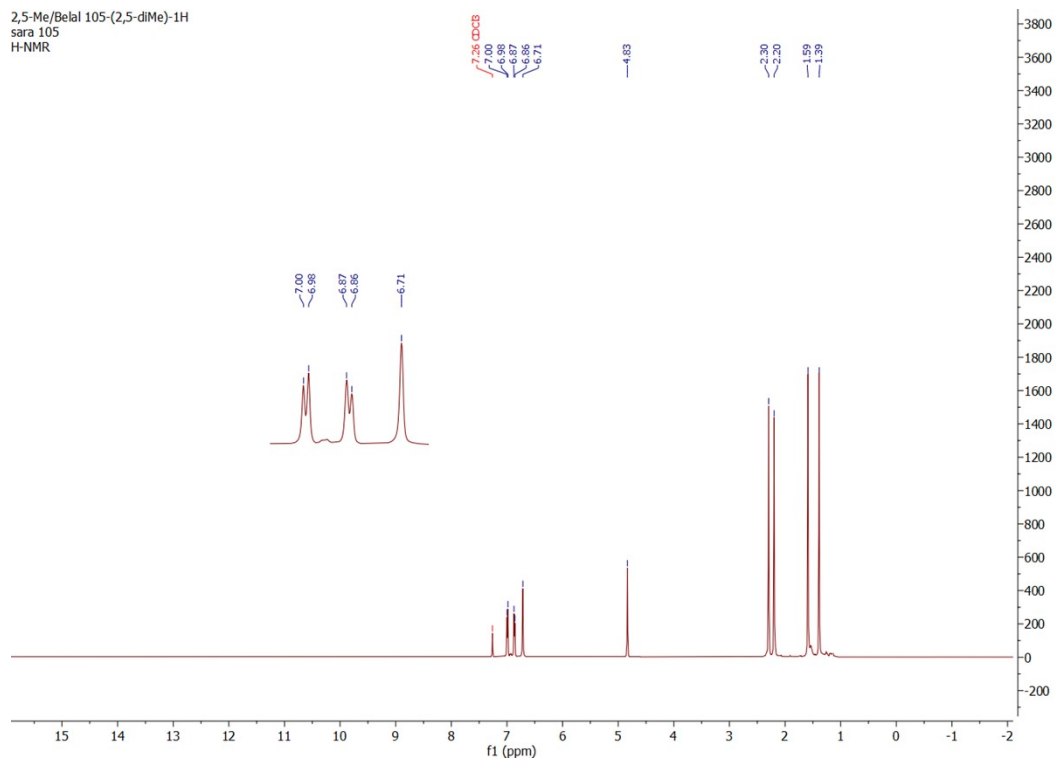

**Figure S39.**  $^1\text{H}$  NMR spectrum ( $\text{CDCl}_3$ , 25 °C, 500.303 MHz) of **4i**.

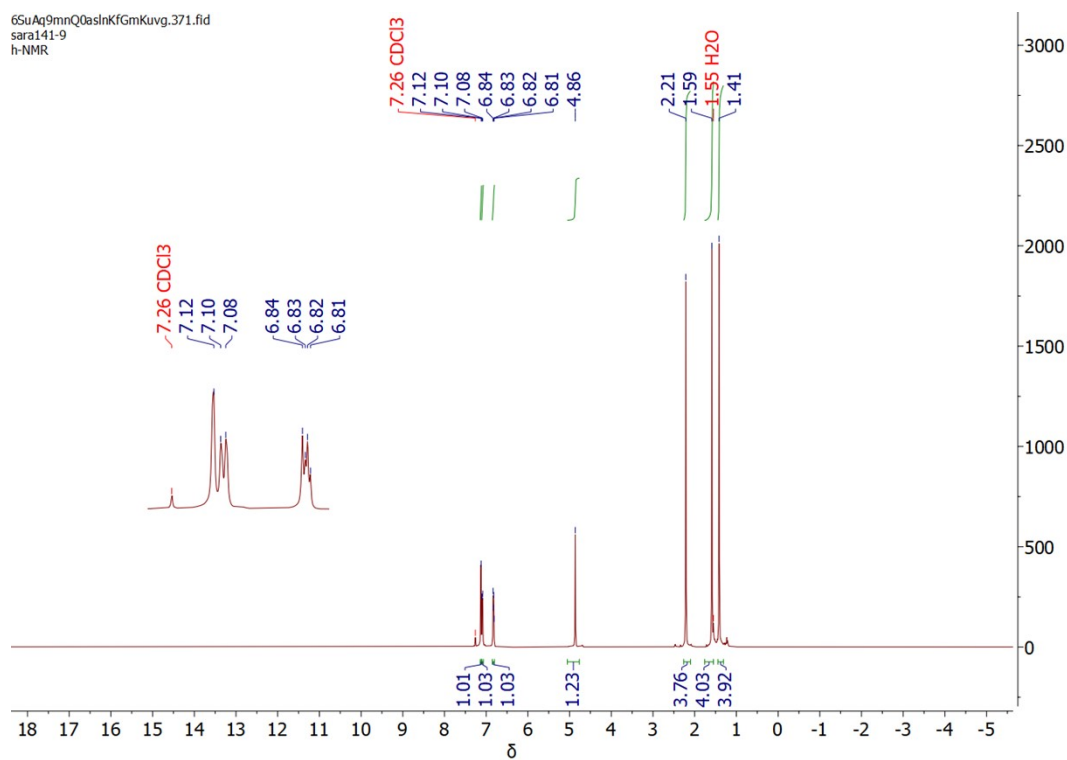

**Figure S40.**  $^1\text{H}$  NMR spectrum ( $\text{CDCl}_3$ , 25 °C, 500.303 MHz) of **4j**.

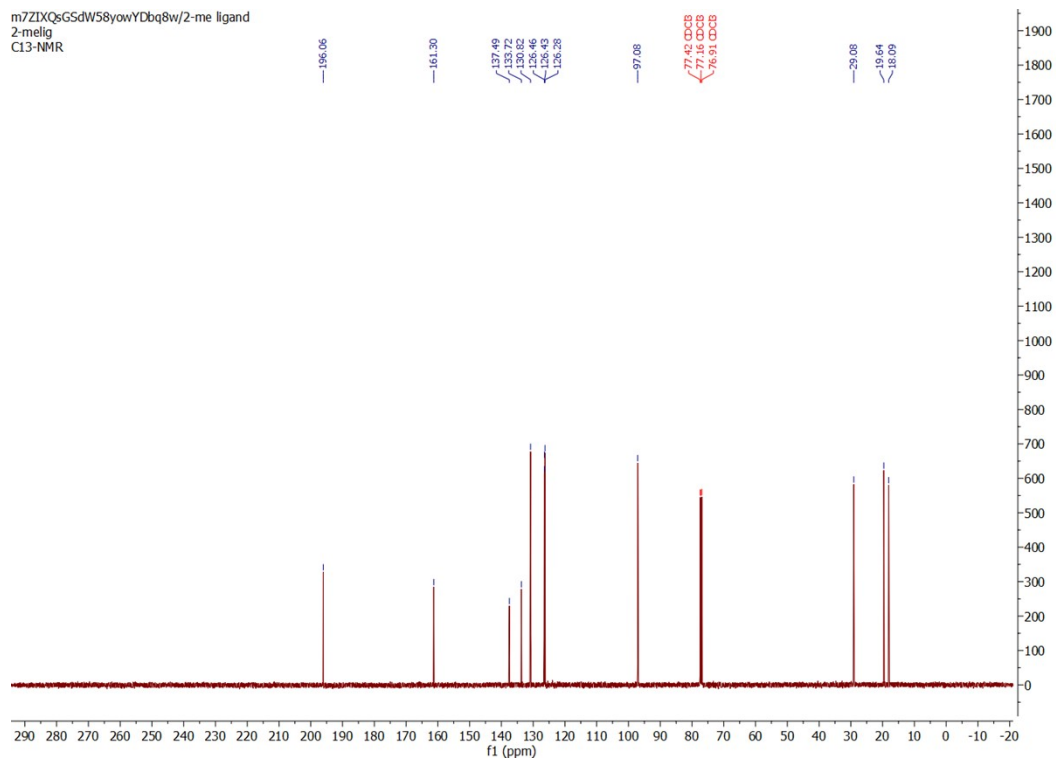

**Figure S41.**  $^{13}\text{C}\{^1\text{H}\}$  NMR spectrum ( $\text{CDCl}_3$ , 25 °C, 125.813 MHz) of **3a**.

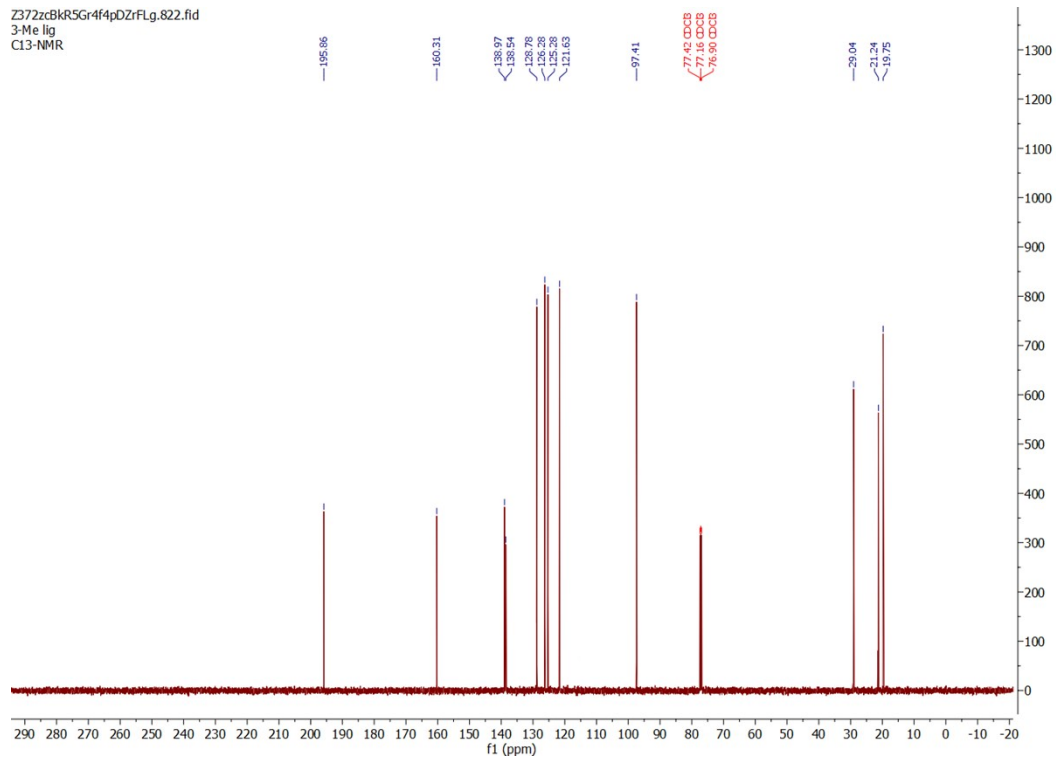

**Figure S42.**  $^{13}\text{C}\{^1\text{H}\}$  NMR spectrum ( $\text{CDCl}_3$ , 25 °C, 125.813 MHz) of **3b**.

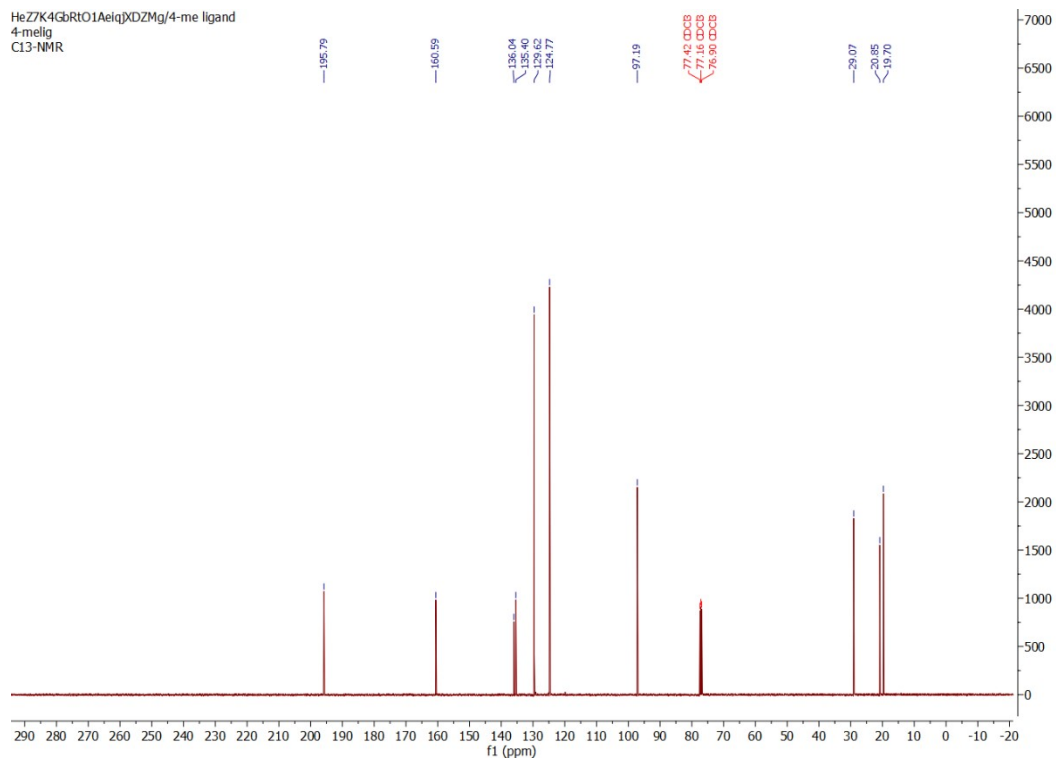

**Figure S43.**  $^{13}\text{C}\{^1\text{H}\}$  NMR spectrum ( $\text{CDCl}_3$ , 25 °C, 125.813 MHz) of **3c**.

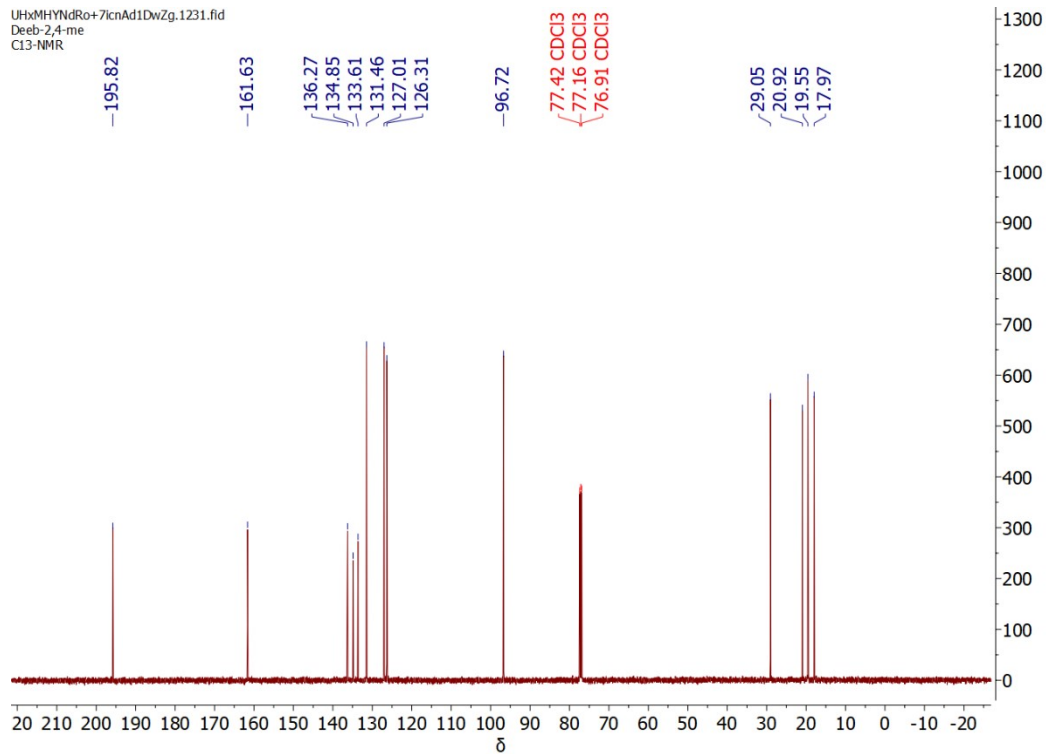

**Figure S44.**  $^{13}\text{C}\{^1\text{H}\}$  NMR spectrum ( $\text{CDCl}_3$ , 25 °C, 125.813 MHz) of **3d**.

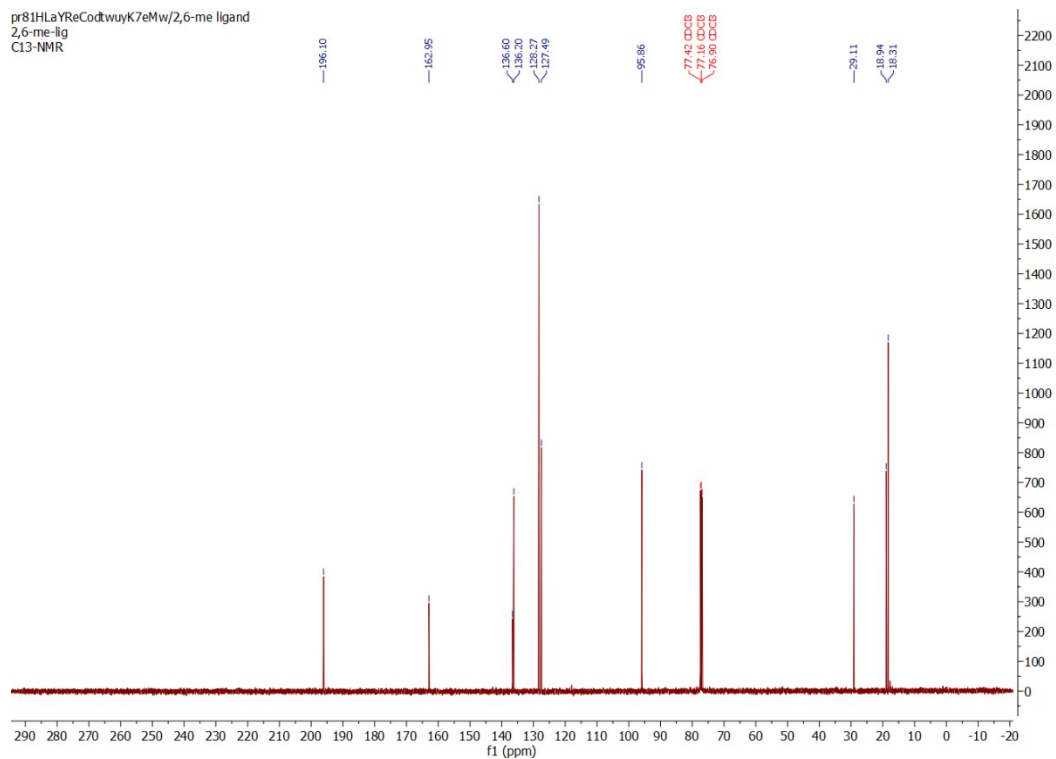

**Figure S45.**  $^{13}\text{C}\{^1\text{H}\}$  NMR spectrum (CDCl<sub>3</sub>, 25 °C, 125.813 MHz) of **3e**.

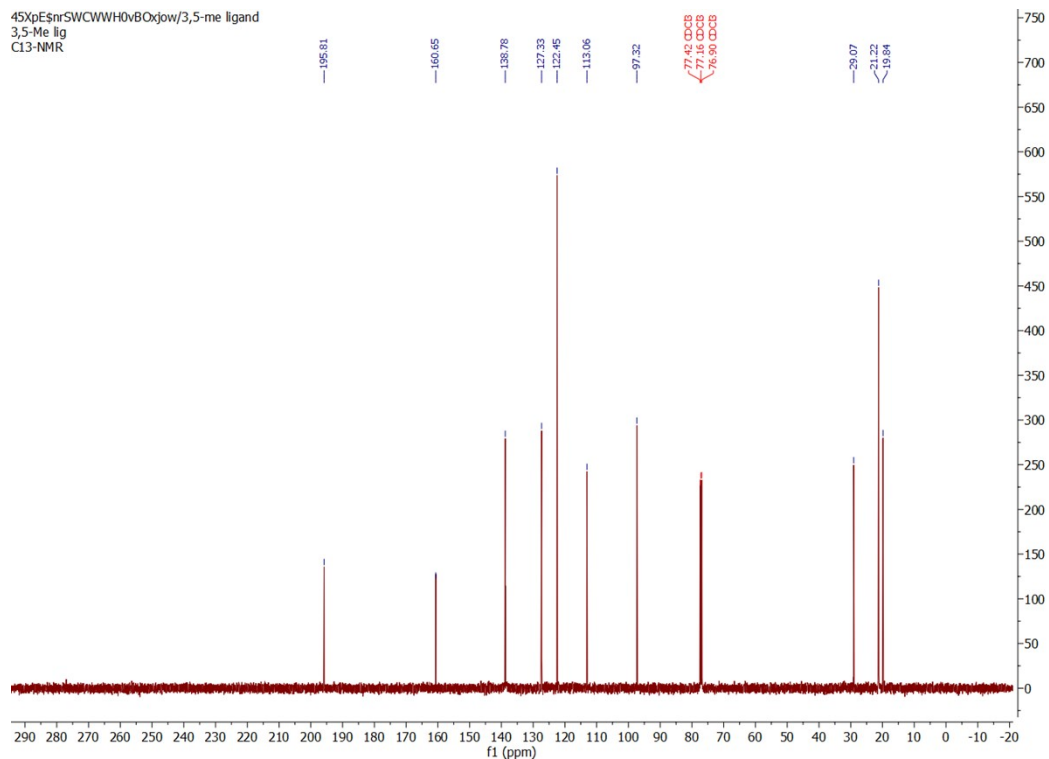

**Figure S46.**  $^{13}\text{C}\{^1\text{H}\}$  NMR spectrum (CDCl<sub>3</sub>, 25 °C, 125.813 MHz) of **3f**.

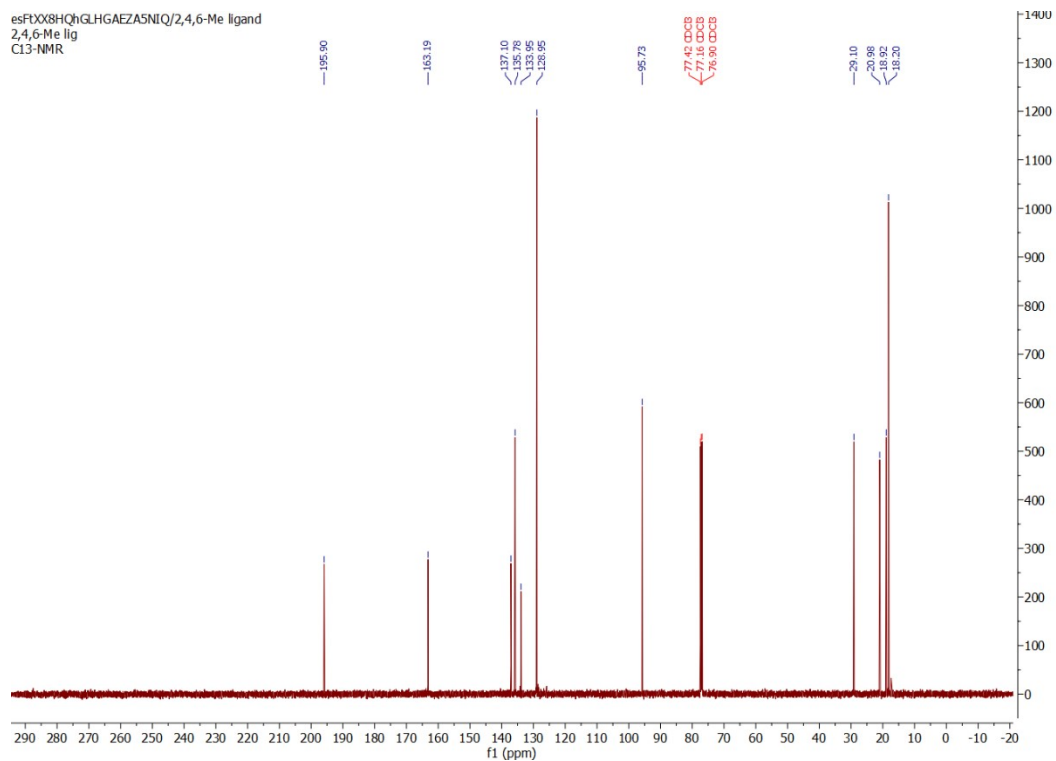

**Figure S47.**  $^{13}\text{C}\{^1\text{H}\}$  NMR spectrum ( $\text{CDCl}_3$ , 25 °C, 125.813 MHz) of **3g**.

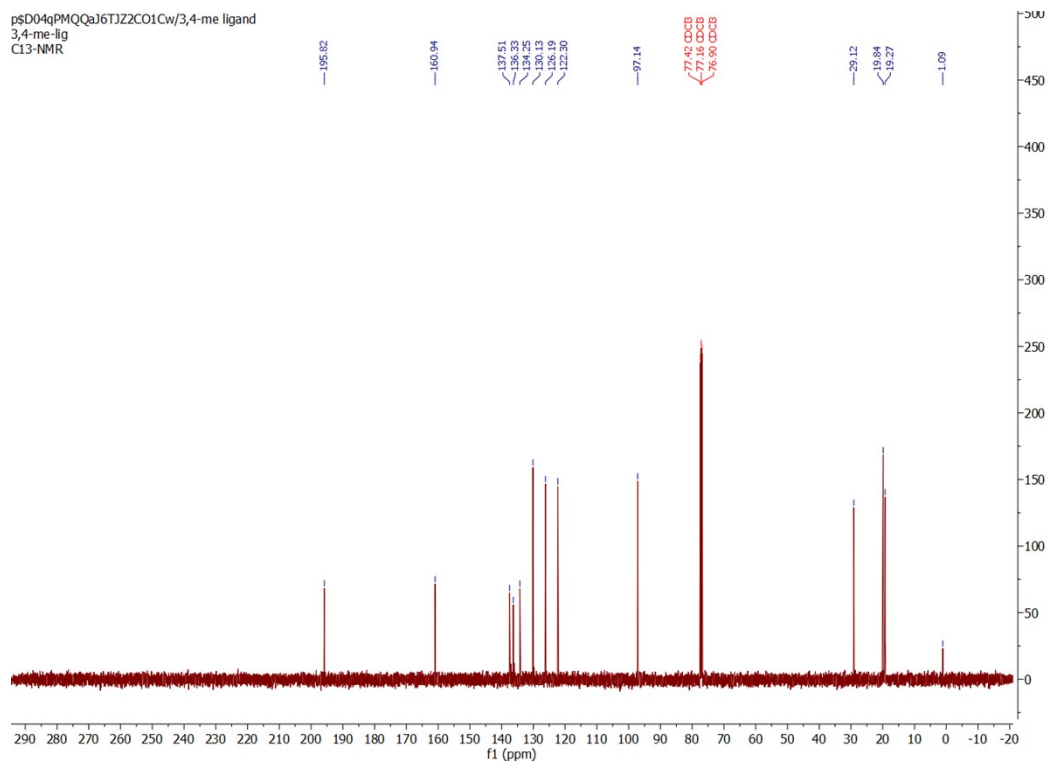

**Figure S48.**  $^{13}\text{C}\{^1\text{H}\}$  NMR spectrum ( $\text{CDCl}_3$ , 25 °C, 125.813 MHz) of **3h**.

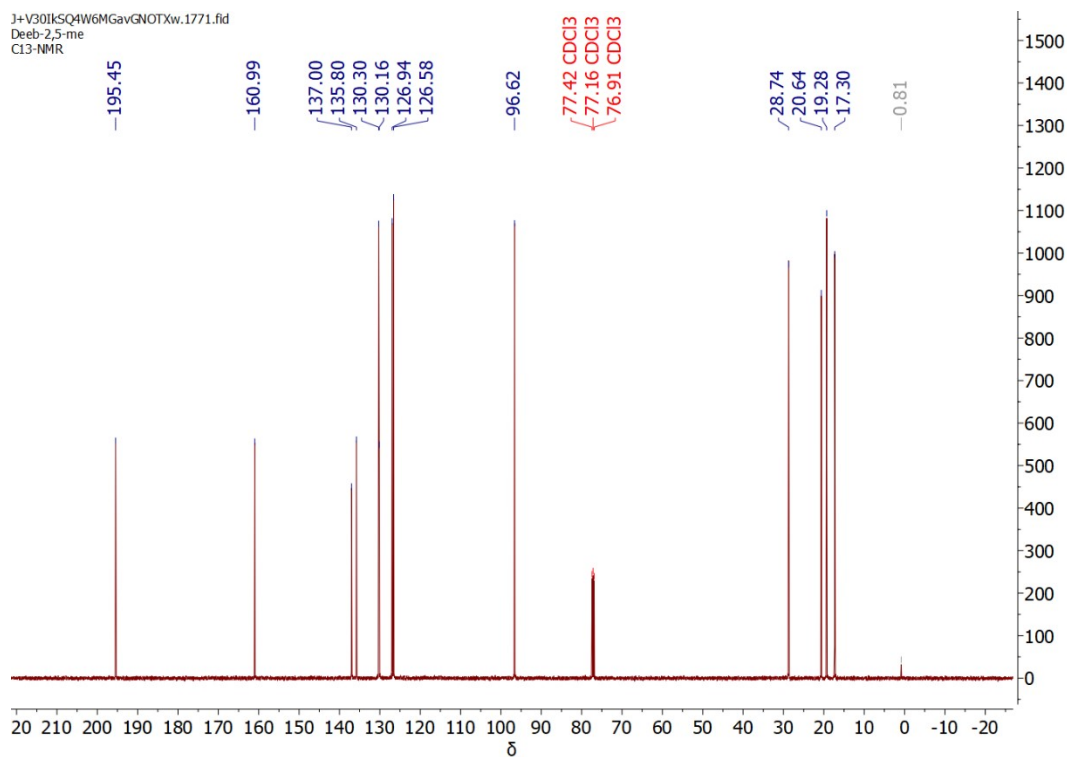

**Figure S49.**  $^{13}\text{C}\{^1\text{H}\}$  NMR spectrum ( $\text{CDCl}_3$ , 25 °C, 125.813 MHz) of **3i**.

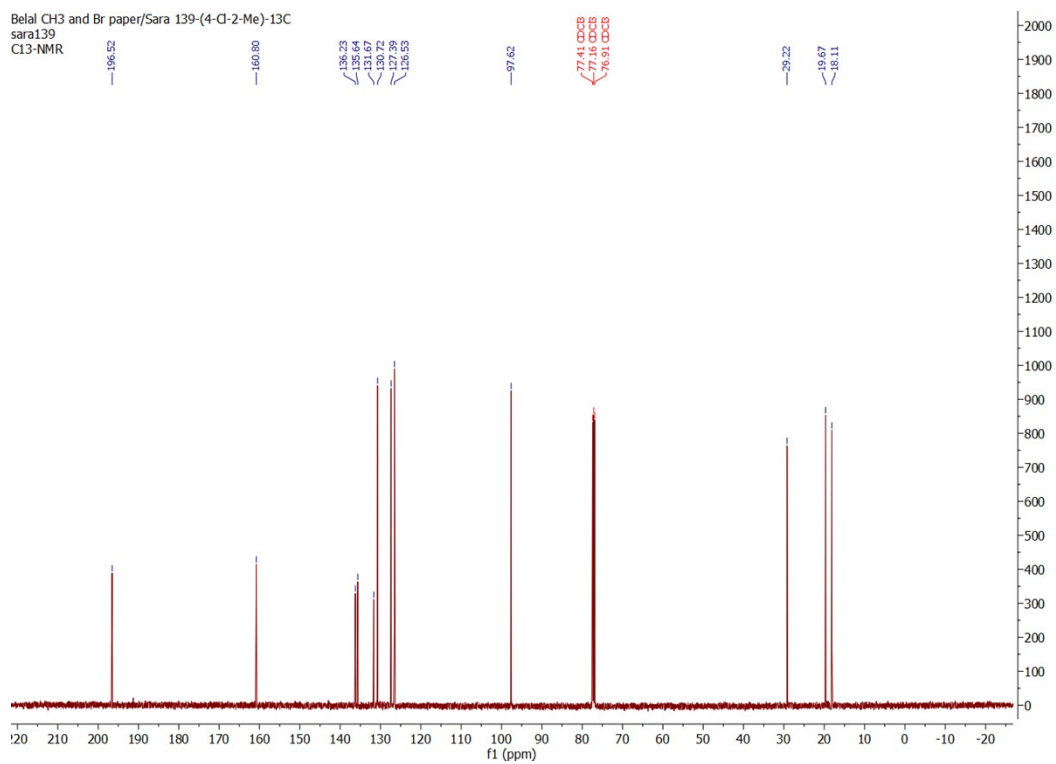

**Figure S50.**  $^{13}\text{C}\{^1\text{H}\}$  NMR spectrum ( $\text{CDCl}_3$ , 25 °C, 125.813 MHz) of **3j**.

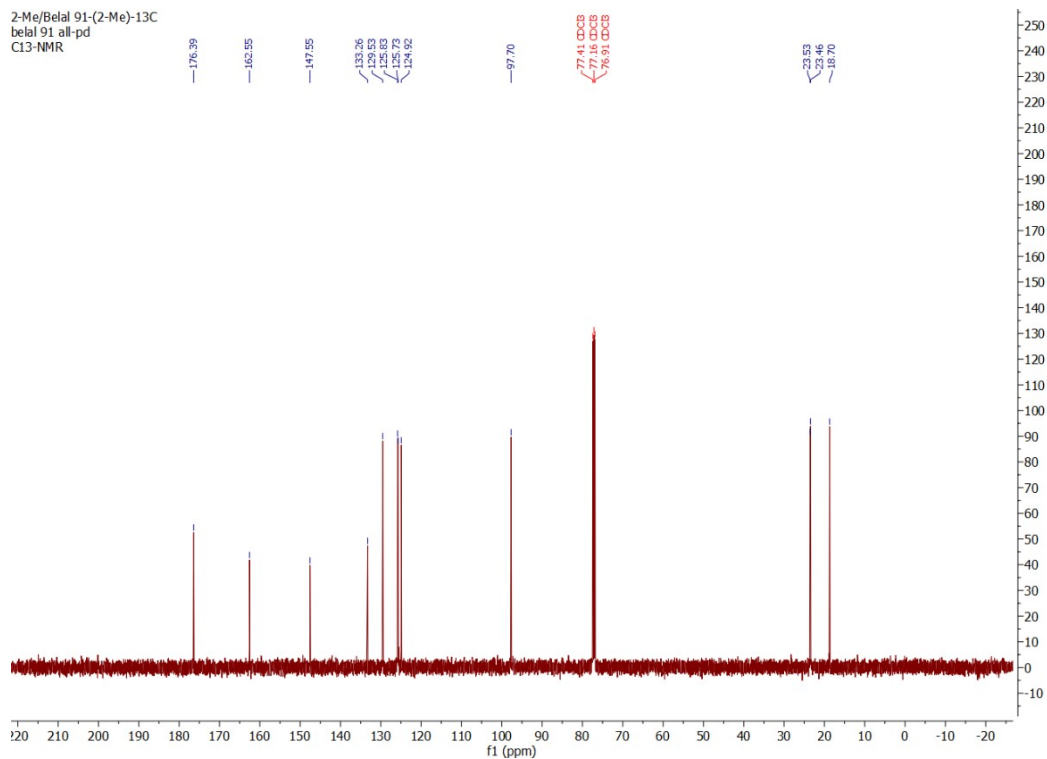

**Figure S51.**  $^{13}\text{C}\{^1\text{H}\}$  NMR spectrum ( $\text{CDCl}_3$ , 25 °C, 125.813 MHz) of **4a**.

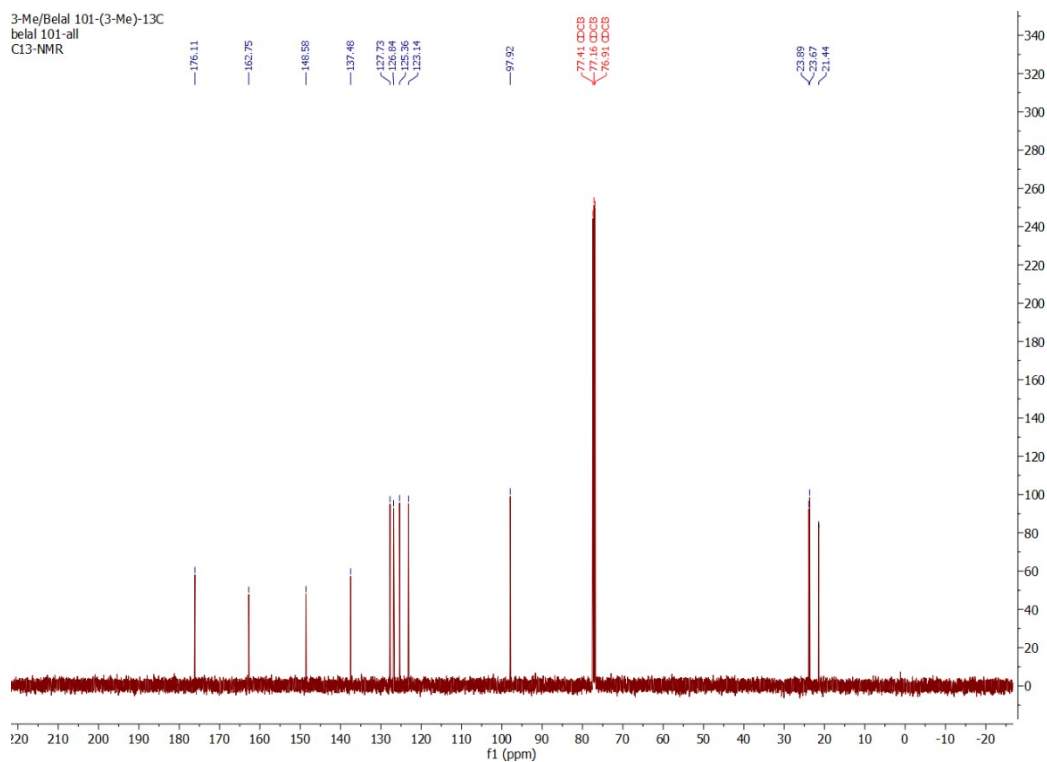

**Figure S52.**  $^{13}\text{C}\{^1\text{H}\}$  NMR spectrum ( $\text{CDCl}_3$ , 25 °C, 125.813 MHz) of **4b**.

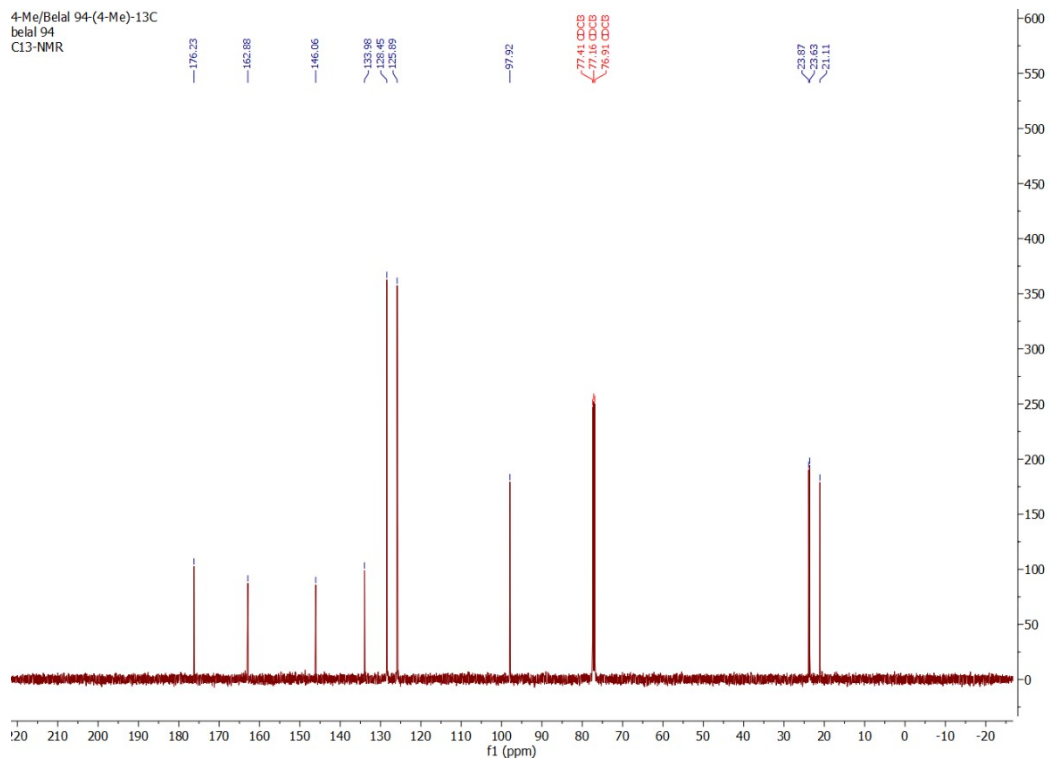

Figure S53.  $^{13}\text{C}\{^1\text{H}\}$  NMR spectrum ( $\text{CDCl}_3$ , 25 °C, 125.813 MHz) of **4c**.

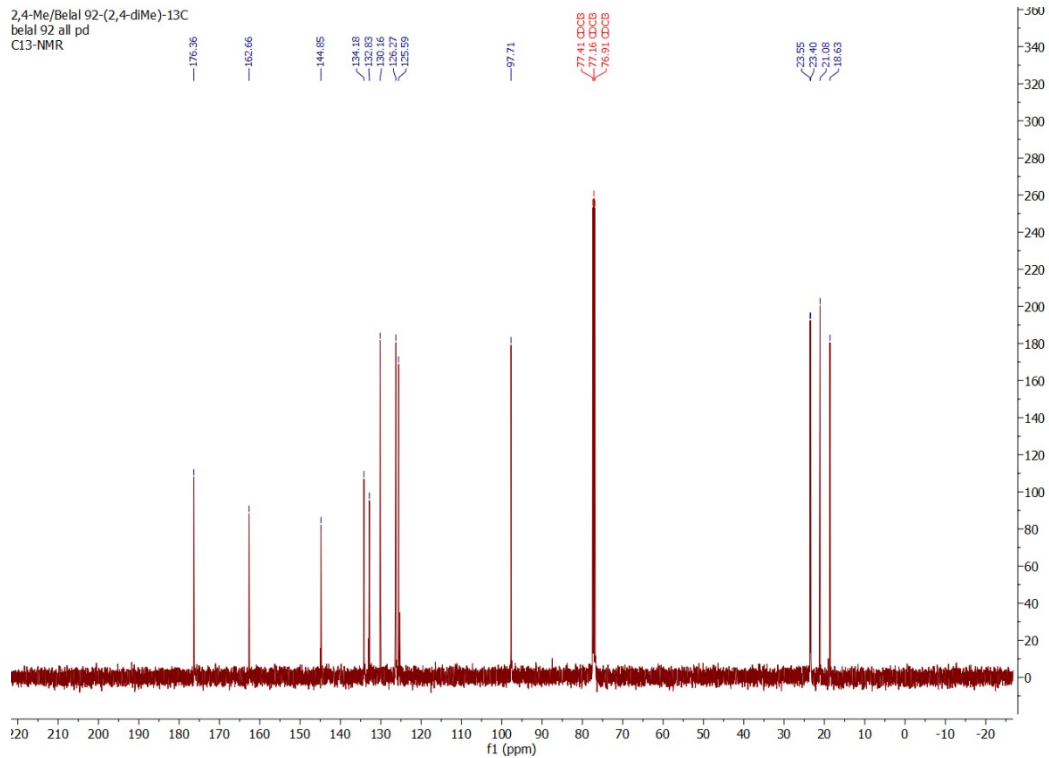

Figure S54.  $^{13}\text{C}\{^1\text{H}\}$  NMR spectrum ( $\text{CDCl}_3$ , 25 °C, 125.813 MHz) of **4d**.

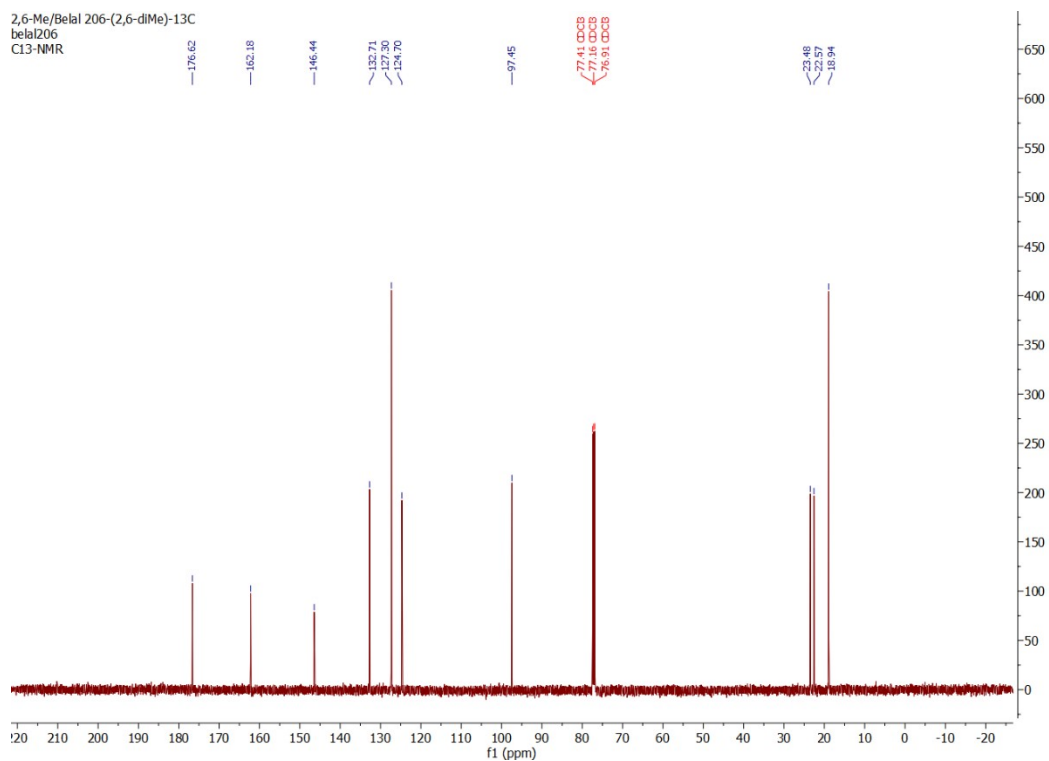

**Figure S55.**  $^{13}\text{C}\{^1\text{H}\}$  NMR spectrum ( $\text{CDCl}_3$ , 25 °C, 125.813 MHz) of **4e**.

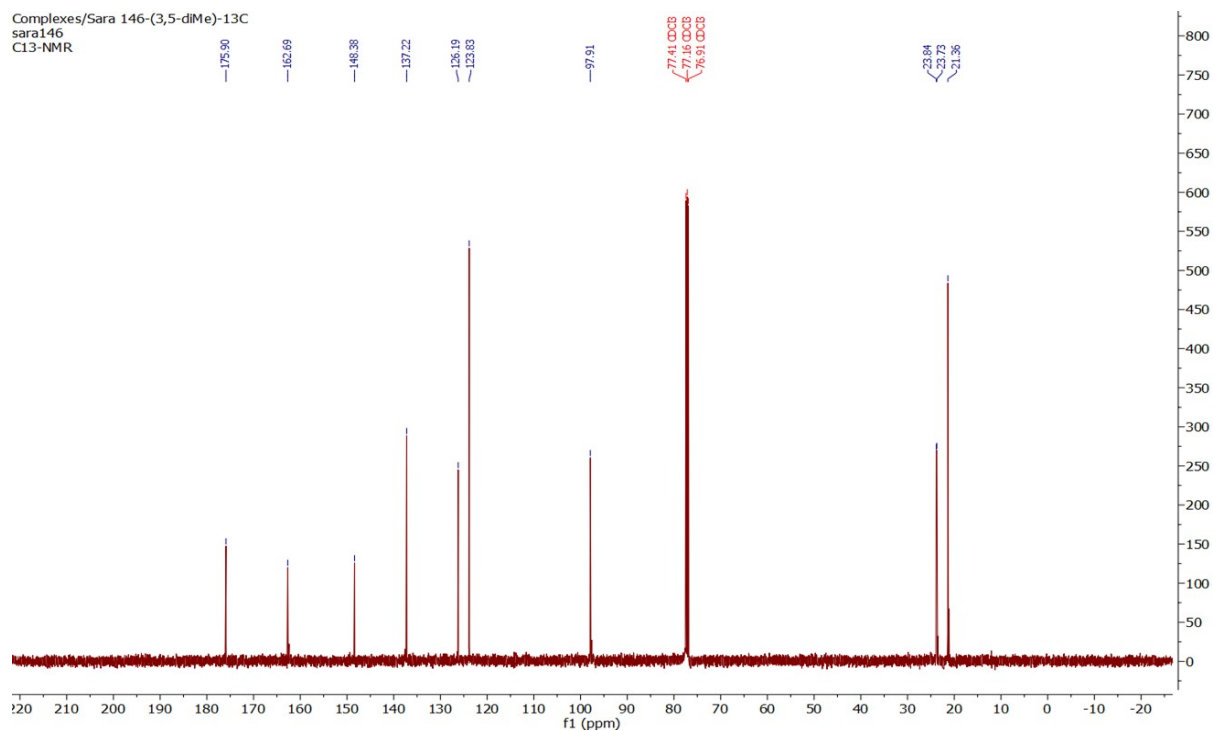

**Figure S56.**  $^{13}\text{C}\{^1\text{H}\}$  NMR spectrum ( $\text{CDCl}_3$ , 25 °C, 125.813 MHz) of **4f**.

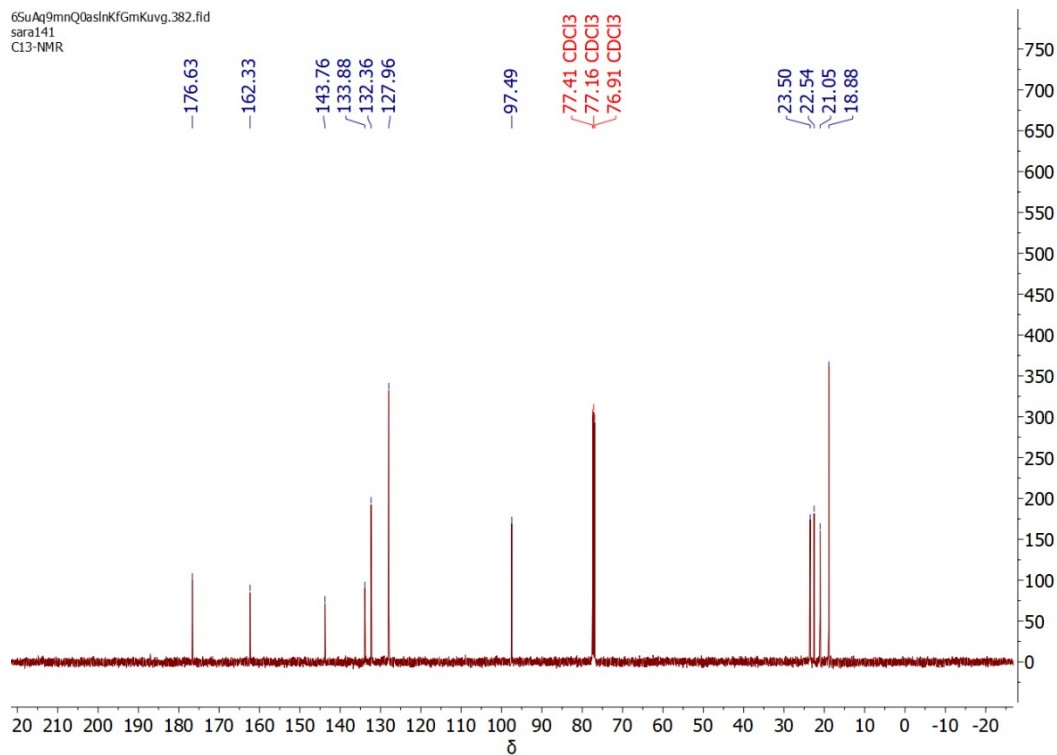

**Figure S57.**  $^{13}\text{C}\{^1\text{H}\}$  NMR spectrum ( $\text{CDCl}_3$ , 25 °C, 125.813 MHz) of **4g**.

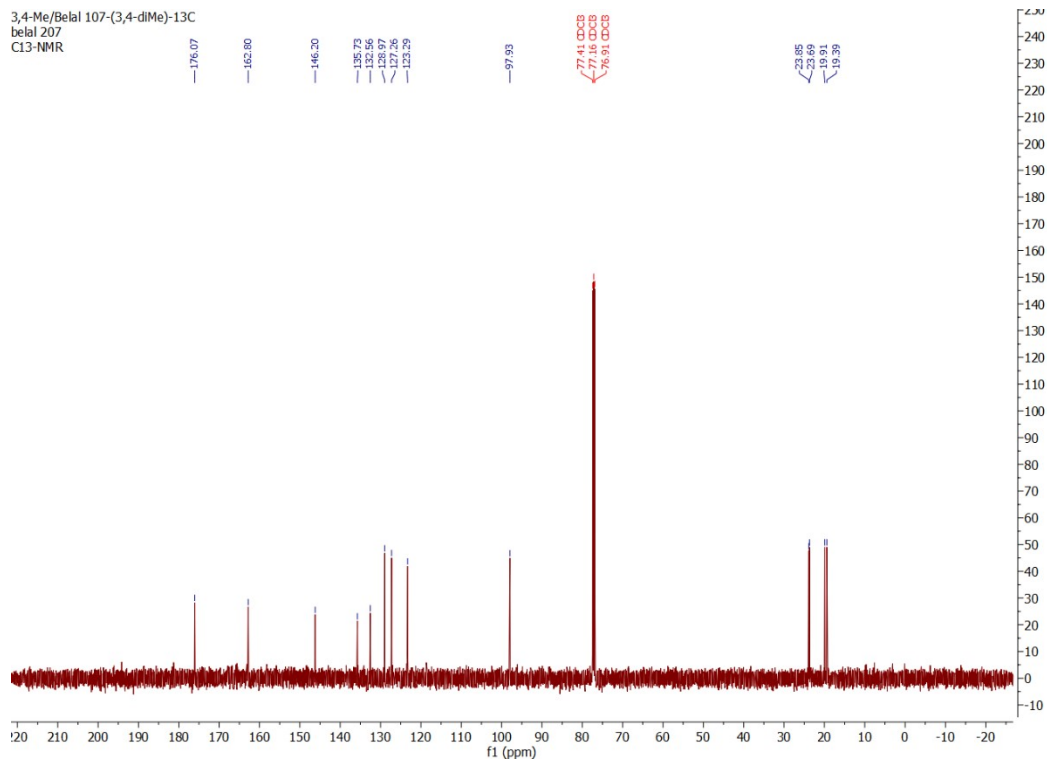

**Figure S58.**  $^{13}\text{C}\{^1\text{H}\}$  NMR spectrum ( $\text{CDCl}_3$ , 25 °C, 125.813 MHz) of **4h**.

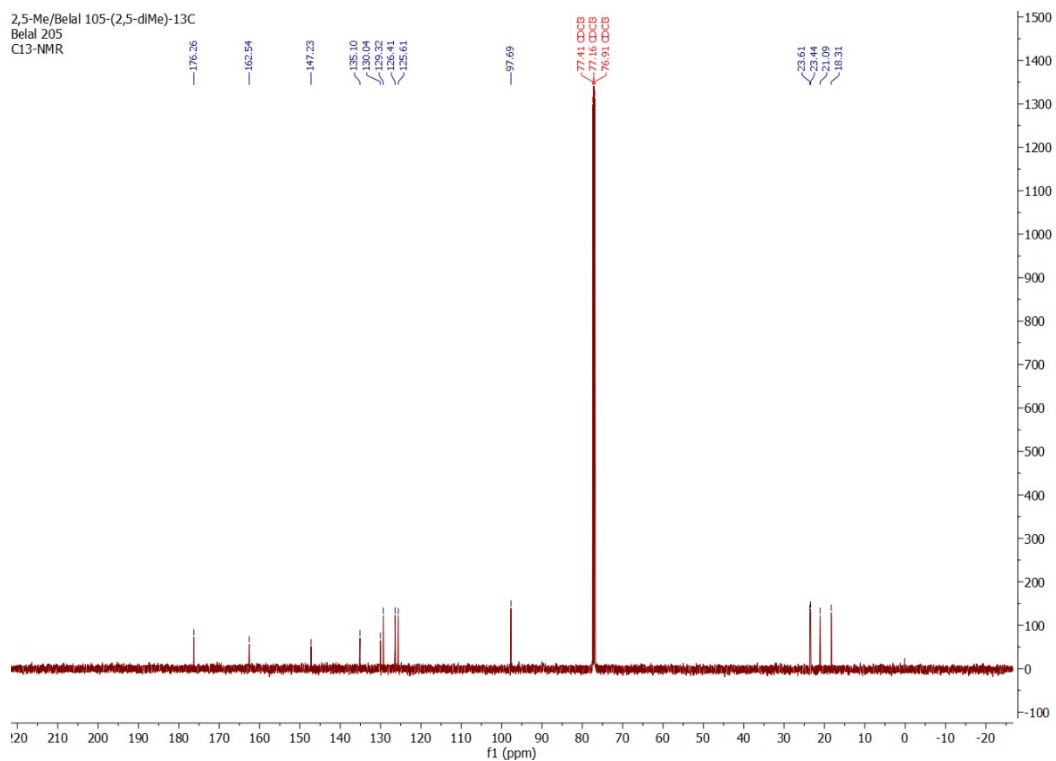

**Figure S59.**  $^{13}\text{C}\{^1\text{H}\}$  NMR spectrum ( $\text{CDCl}_3$ , 25 °C, 125.813 MHz) of **4i**.

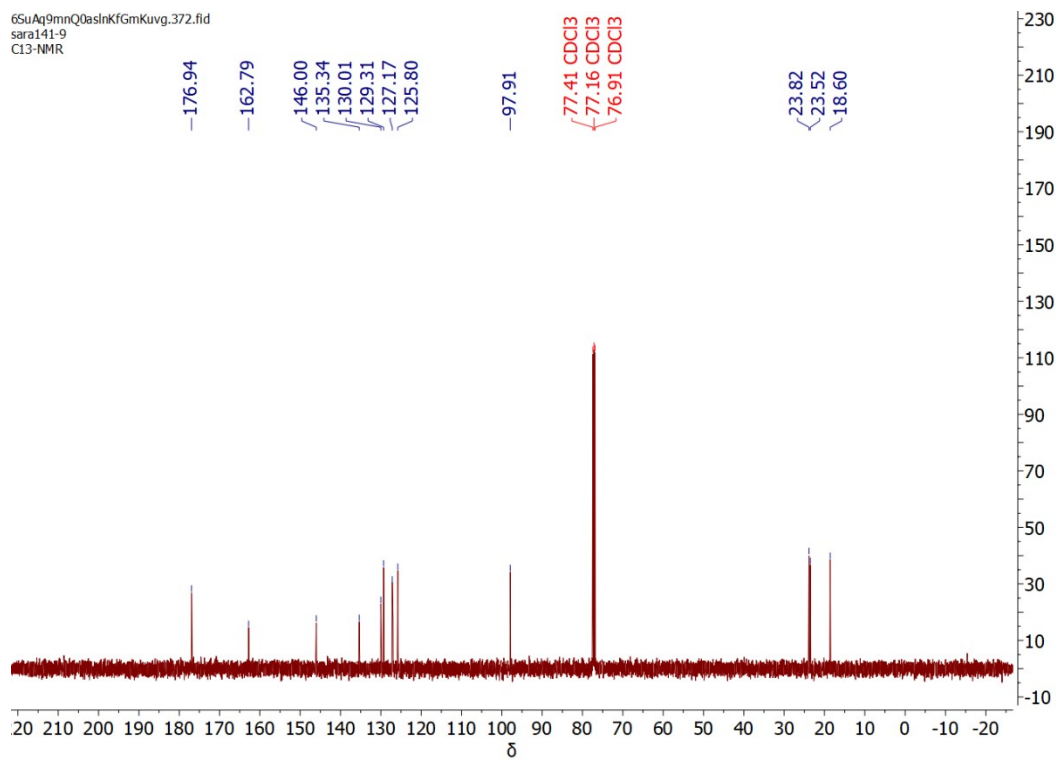

**Figure S60.**  $^{13}\text{C}\{^1\text{H}\}$  NMR spectrum ( $\text{CDCl}_3$ , 25 °C, 125.813 MHz) of **4j**.

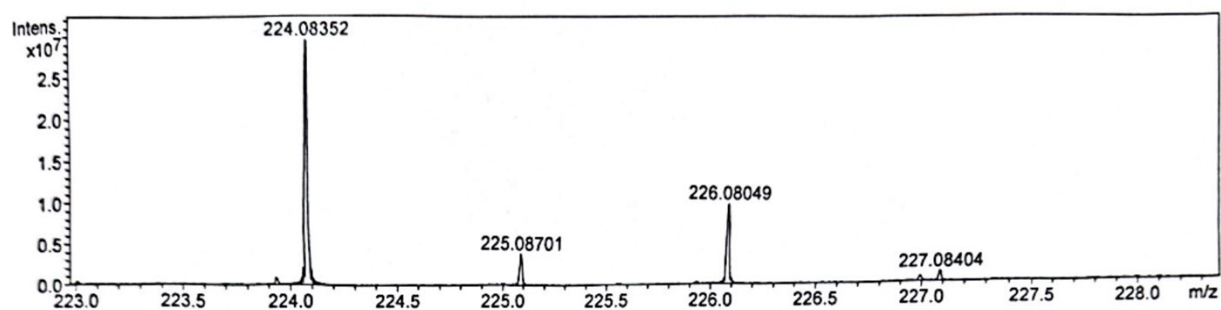

**Figure S61.** HR-ESI-MS (positive ion mode) spectrum of **3j**. Monoisotopic mass for  $C_{12}H_{15}ClNO$  ( $M+H$ )  
 Calc. 224.08367 found 224.08352.

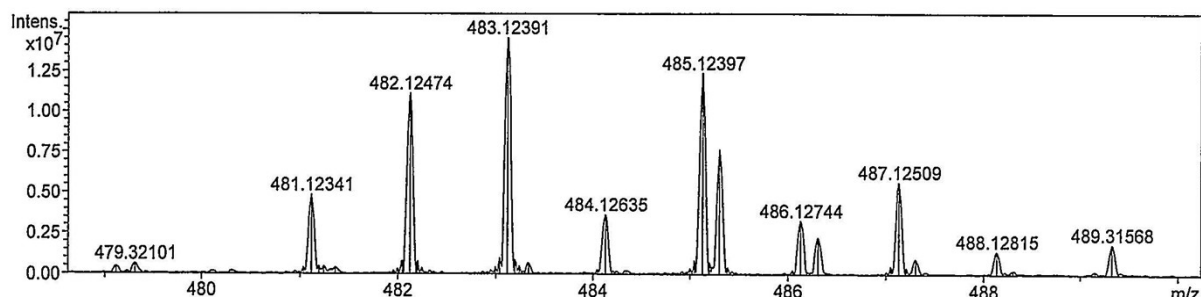

**Figure S62.** HR-ESI-MS (positive ion mode) spectrum of **4a**. Monoisotopic mass for  $C_{24}H_{29}N_2O_2Pd$   
 ( $M+H$ ) Calc. 483.12584 found 483.12391.

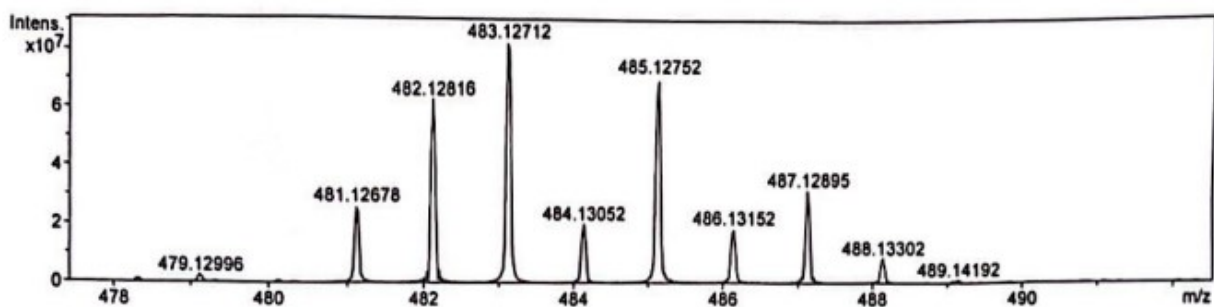

**Figure S63.** HR-ESI-MS (positive ion mode) spectrum of **4b**. Monoisotopic mass for  $C_{24}H_{29}N_2O_2Pd$   
 ( $M+H$ ) Calc. 483.12584 found 483.12712.

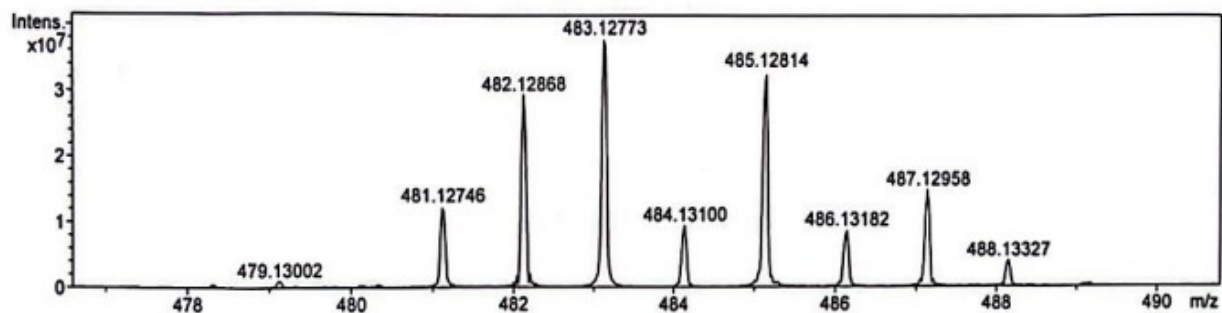

**Figure S64.** HR-ESI-MS (positive ion mode) spectrum of **4c**. Monoisotopic mass for  $C_{24}H_{29}N_2O_2Pd$  (M+H) Calc. 483.12584 found 483.12773.

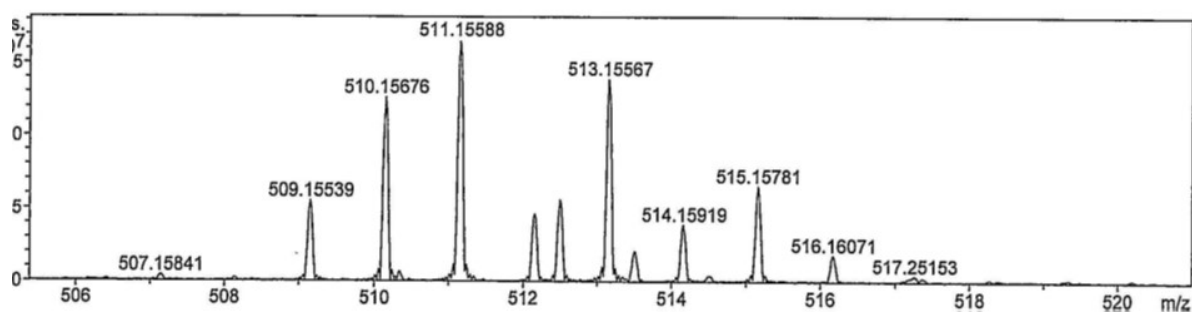

**Figure S65.** HR-ESI-MS (positive ion mode) spectrum of **4d**. Monoisotopic mass for  $C_{26}H_{33}N_2O_2Pd$  (M+H) Calc. 511.15714 found 511.15588.

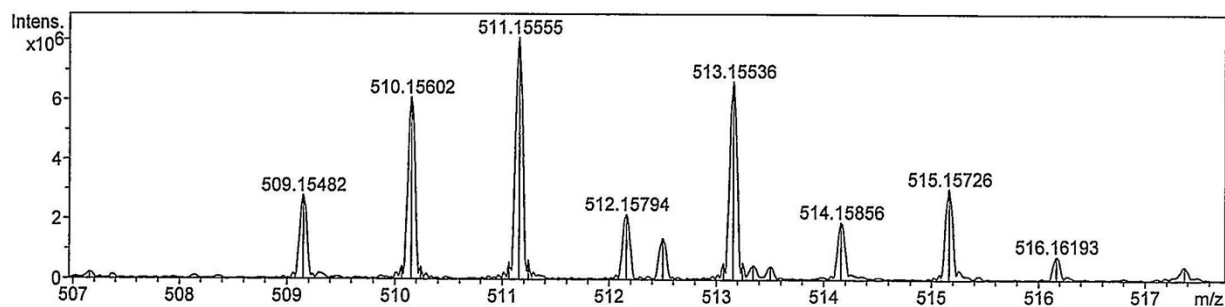

**Figure S66.** HR-ESI-MS (positive ion mode) spectrum of **4e**. Monoisotopic mass for  $C_{26}H_{33}N_2O_2Pd$  (M+H) Calc. 511.15714 found 511.15555.

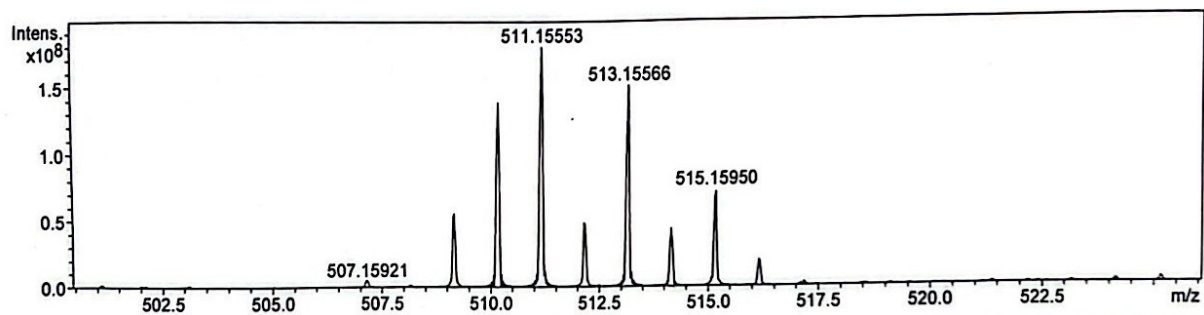

**Figure S67.** HR-ESI-MS (positive ion mode) spectrum of **4f**. Monoisotopic mass for  $C_{26}H_{33}N_2O_2Pd$  (M+H) Calc. 511.15714 found 511.15553.

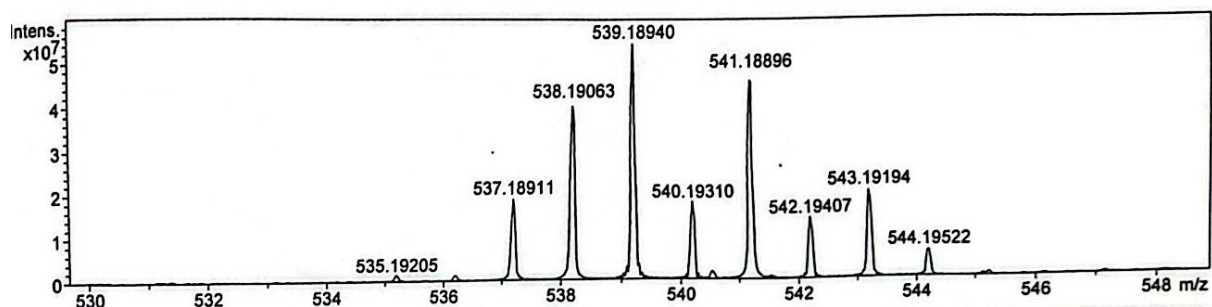

**Figure S68.** HR-ESI-MS (positive ion mode) spectrum of **4g**. Monoisotopic mass for  $C_{28}H_{37}N_2O_2Pd$  (M+H) Calc. 539.18844 found 539.18940.

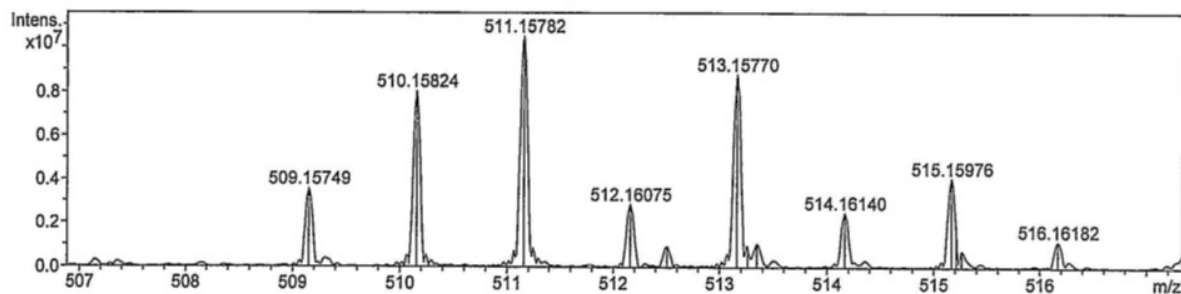

**Figure S69.** HR-ESI-MS (positive ion mode) spectrum of **4h**. Monoisotopic mass for  $C_{26}H_{33}N_2O_2Pd$  (M+H) Calc. 511.15714 found 511.15782.

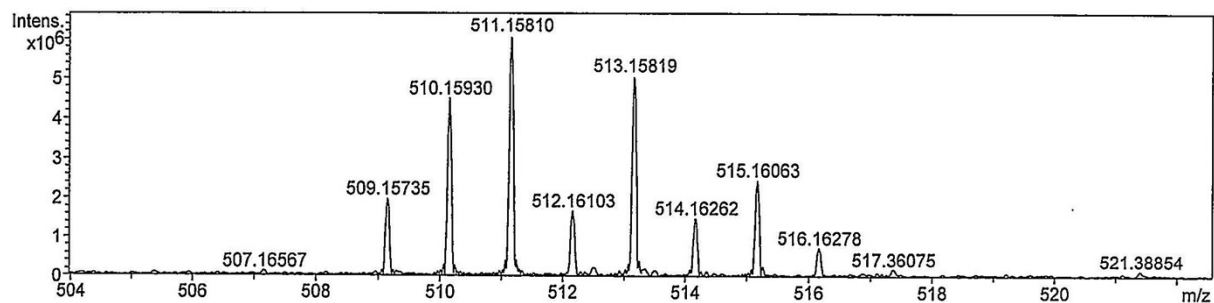

**Figure S70.** HR-ESI-MS (positive ion mode) spectrum of **4i**. Monoisotopic mass for  $C_{26}H_{33}N_2O_2Pd$  (M+H) Calc. 511.15714 found 511.15810.

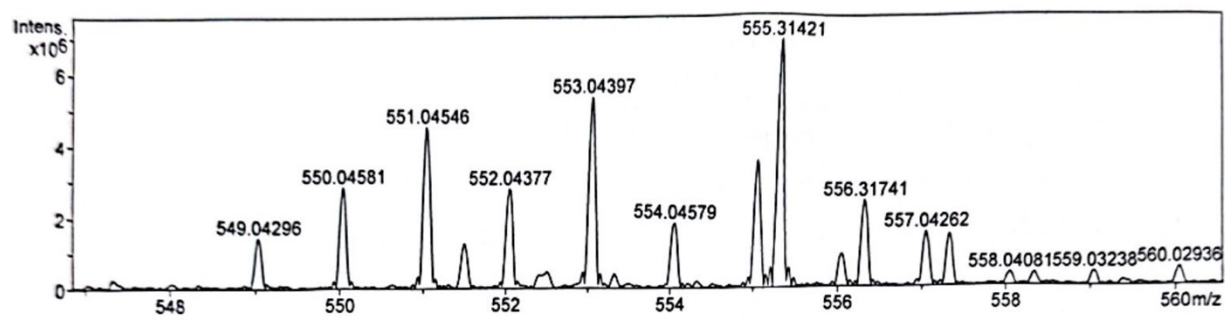

**Figure S71.** HR-ESI-MS (positive ion mode) spectrum of **4j**. Monoisotopic mass for  $C_{24}H_{27}Cl_2N_2O_2Pd$  (M+H) Calc. 552.08032 found 552.04377.

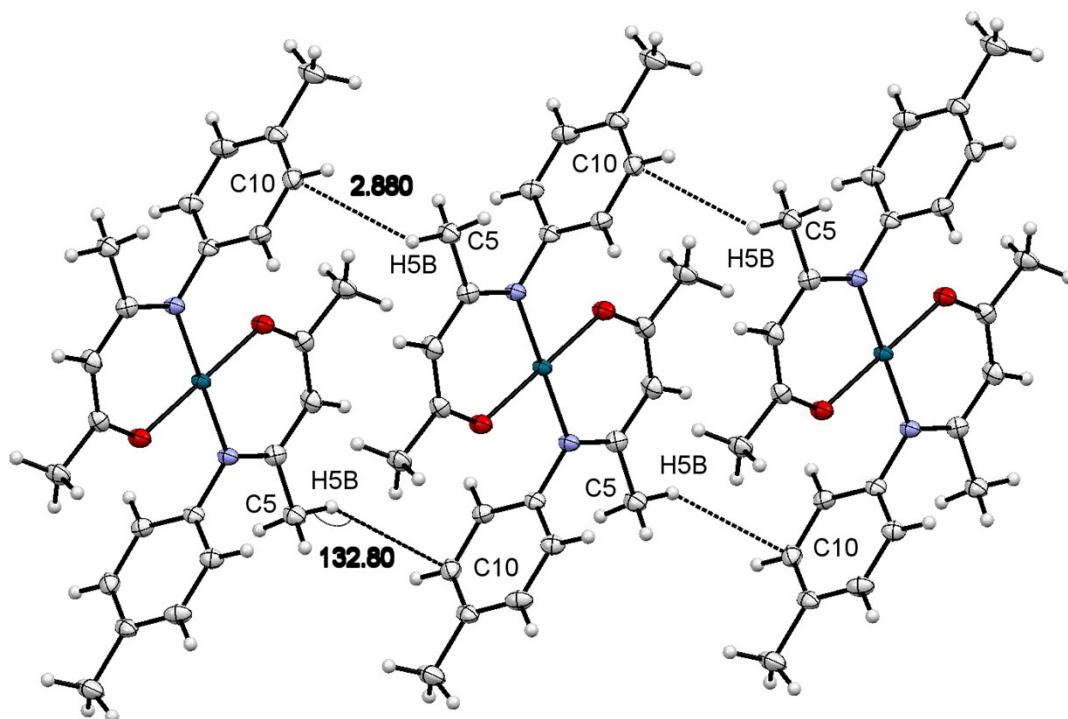

**Figure S72.** Illustration of C–H··· $\pi$  contacts in **4c**.

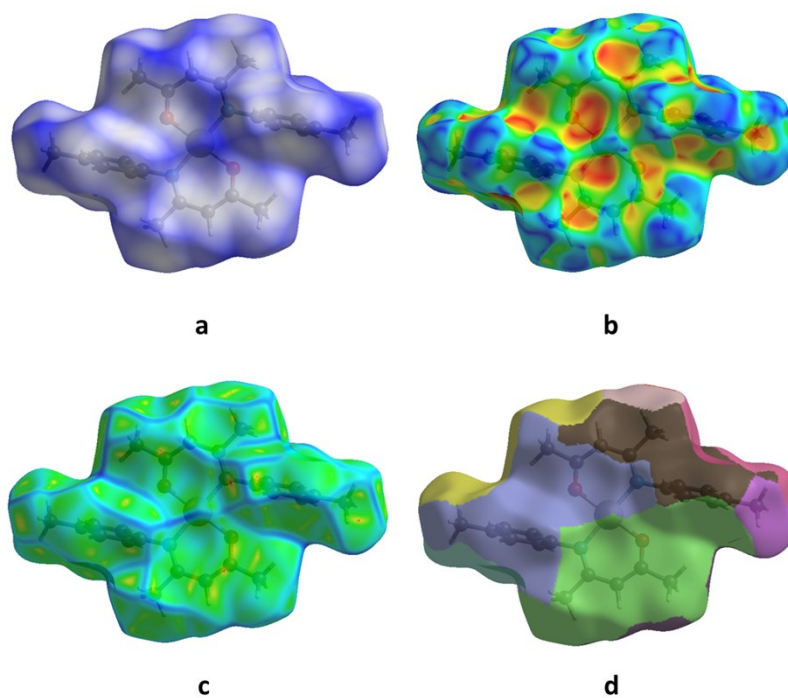

**Figure S73.** (a) Hirshfeld surface of **4c** mapped with  $d_{\text{norm}}$  in the range 0.0179 to -1.3052 a.u. (b) Hirshfeld surface of **4c** mapped with *Shape Index* in the range -1 to 1 a.u. (c) Hirshfeld surfaces with curvedness of **4c**. (d) Hirshfeld surfaces with Fragment patch of **4c**.

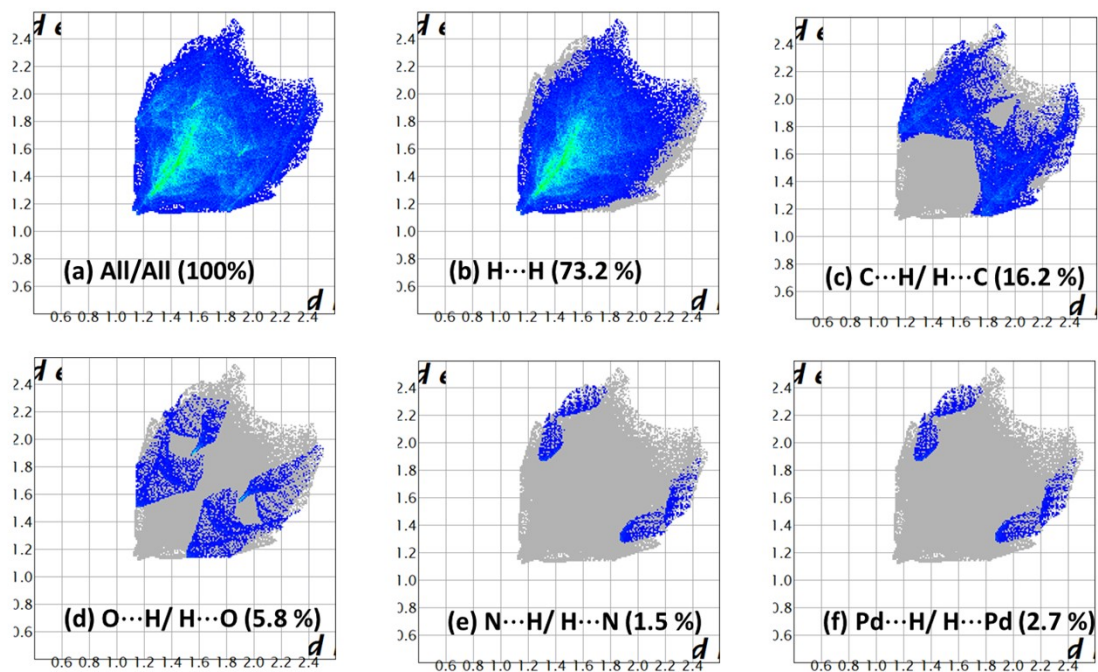

**Figure S74.** Full 2-D fingerprint plot for **4c** and (a) the decomposed contacts representing (b) H...H (73.2 %), (c) C...H/H...C (16.2 %), (d) O...H/H...O (5.8 %), (e) N...H/H...N (1.5 %), and (f) Pd...H/H...Pd (2.7 %) intermolecular interactions.

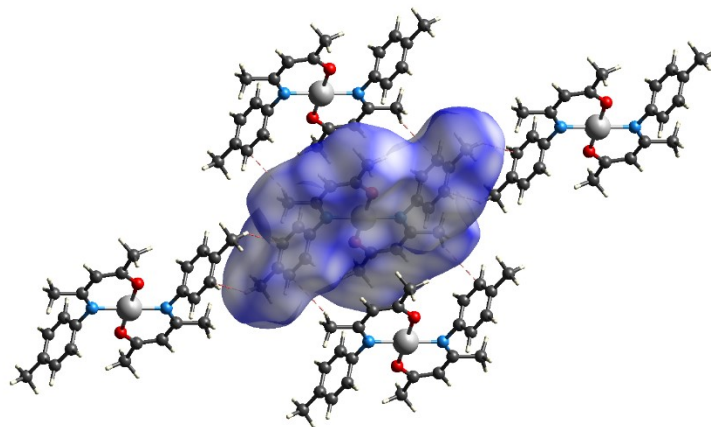

**Figure S75.** Hirshfeld surface contacts in **4c**.

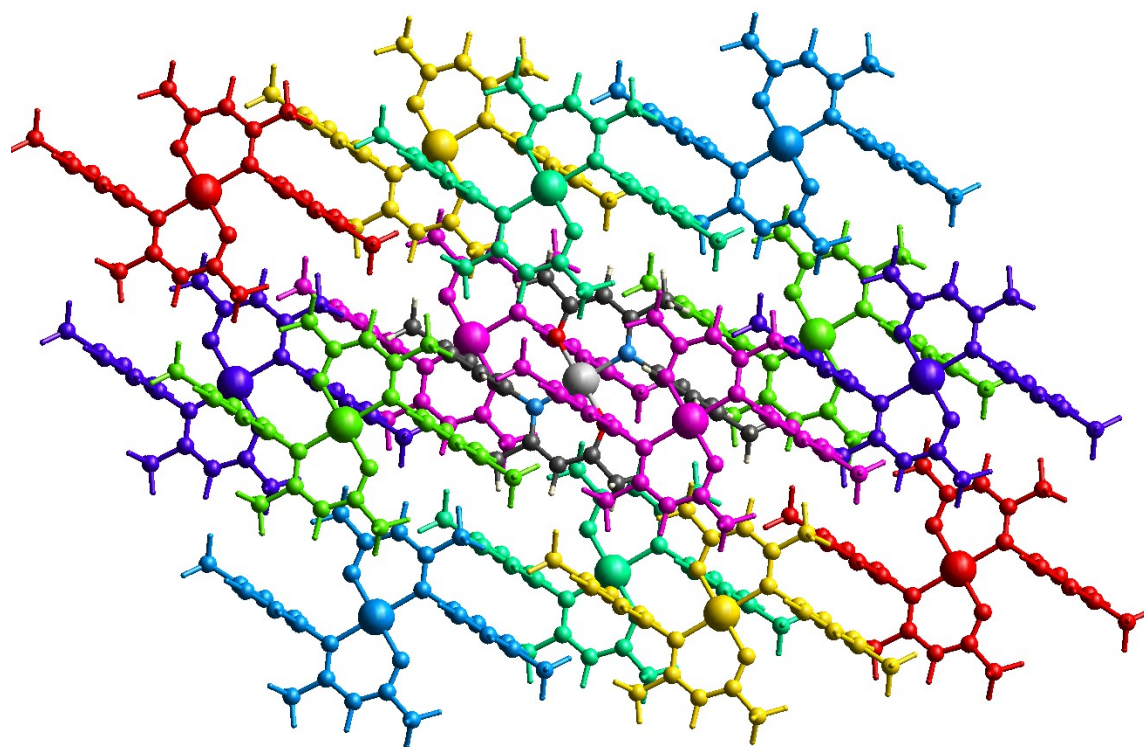

**Figure S76.** Intermolecular interaction topology network between neighbouring molecules within each molecular crystal structure

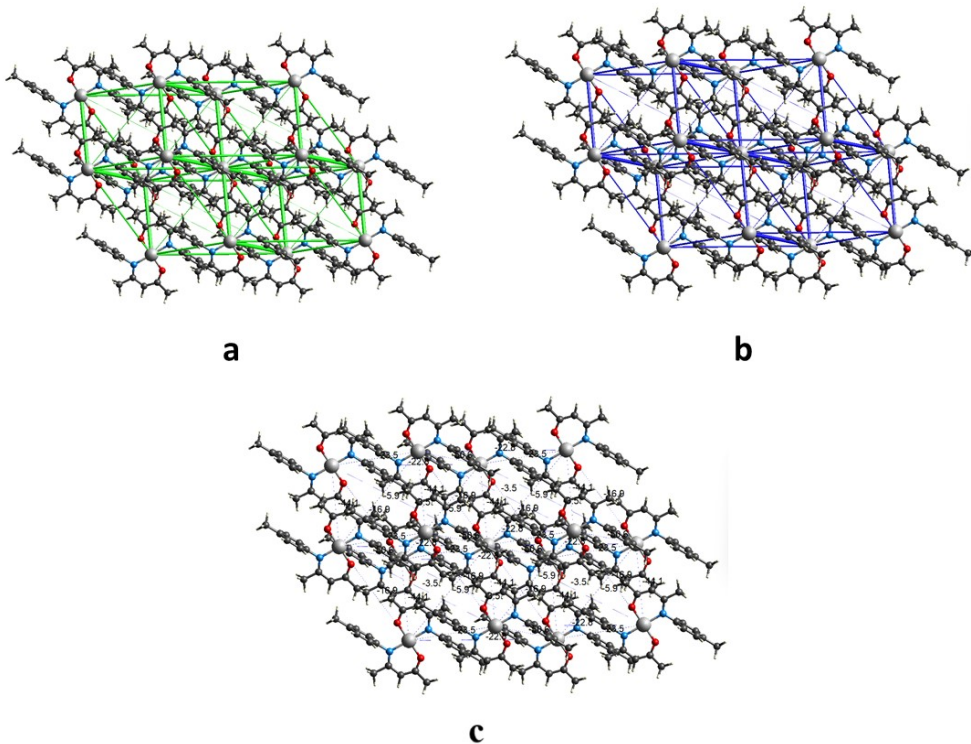

**Figure S77.** (a) Dispersion intermolecular interaction topology energy framework between neighbouring molecules. (b) Total intermolecular interaction topology energy framework between neighboring molecules. (c) Total intermolecular interaction (annotated) energy framework between neighboring molecules.

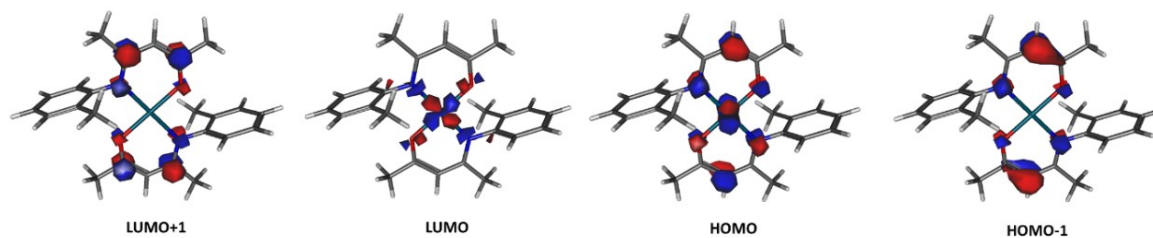

**Figure S78.** The isosurface densities of the frontier orbitals: LUMO+1, LUMO, HOMO, HOMO-1 of compound **4a** (isosurface value 0.06).

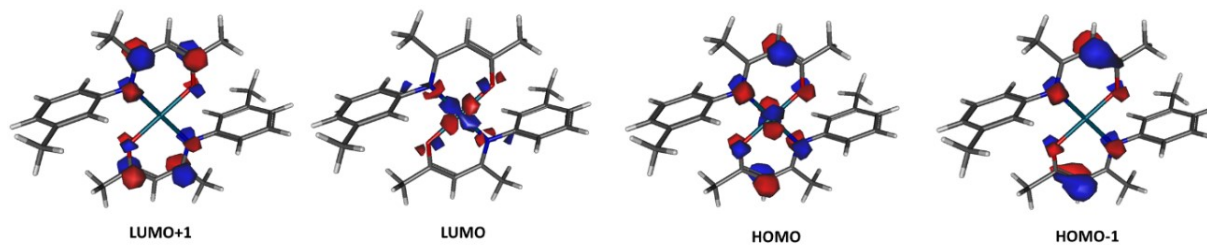

**Figure S79.** The isosurface densities of the frontier orbitals: LUMO+1, LUMO, HOMO, HOMO-1 of compound **4b** (isosurface value 0.06).

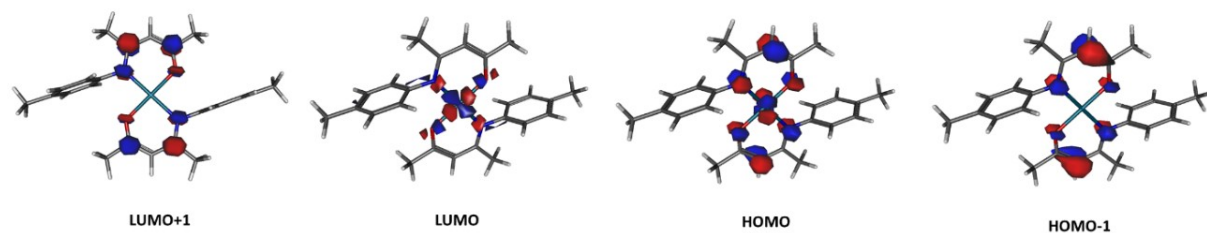

**Figure S80.** The isosurface densities of the frontier orbitals: LUMO+1, LUMO, HOMO, HOMO-1 of compound **4c** (isosurface value 0.06).

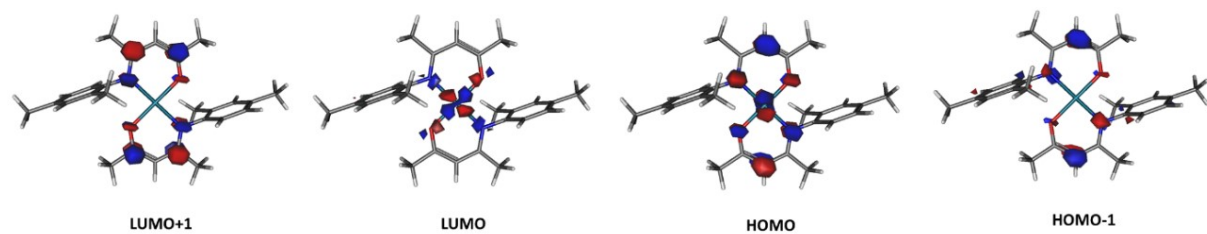

**Figure S81.** The isosurface densities of the frontier orbitals: LUMO+1, LUMO, HOMO, HOMO-1 of compound **4d** (isosurface value 0.06).

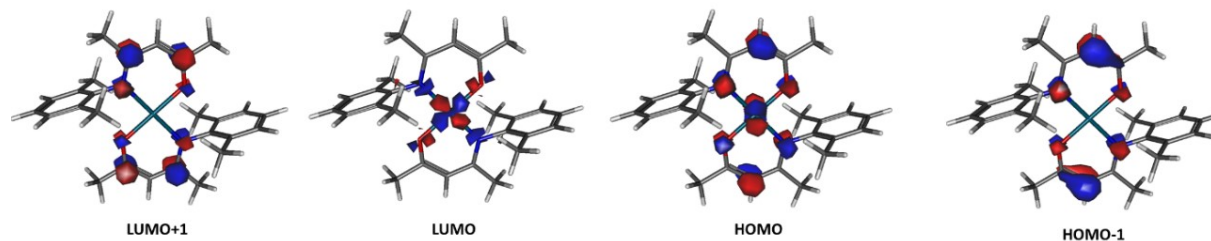

**Figure S82.** The isosurface densities of the frontier orbitals: LUMO+1, LUMO, HOMO, HOMO-1 of compound **4e** (isosurface value 0.06).

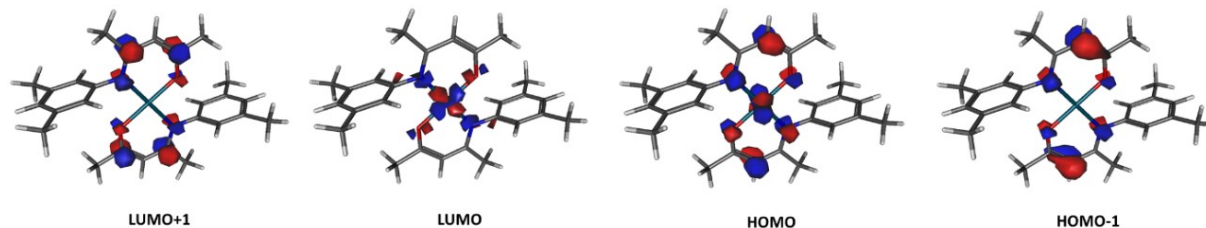

**Figure S83.** The isosurface densities of the frontier orbitals: LUMO+1, LUMO, HOMO, HOMO-1 of compound **4f** (isosurface value 0.06).

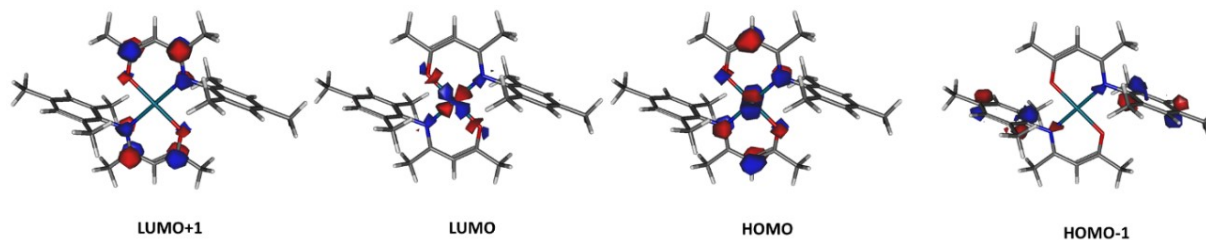

**Figure S84.** The isosurface densities of the frontier orbitals: LUMO+1, LUMO, HOMO, HOMO-1 of compound **4g** (isosurface value 0.06).

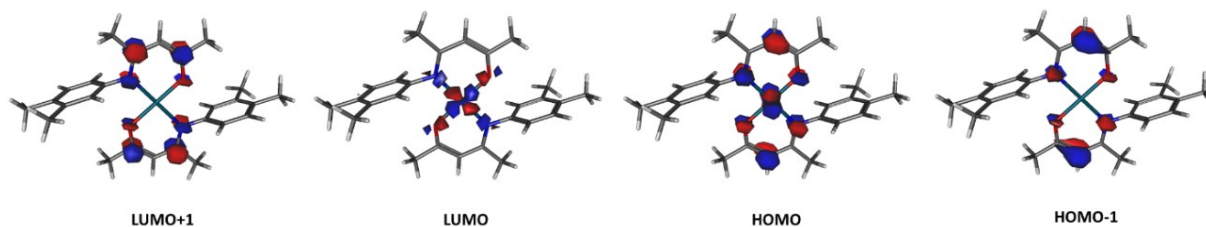

**Figure S85.** The isosurface densities of the frontier orbitals: LUMO+1, LUMO, HOMO, HOMO-1 of compound **4h** (isosurface value 0.06).

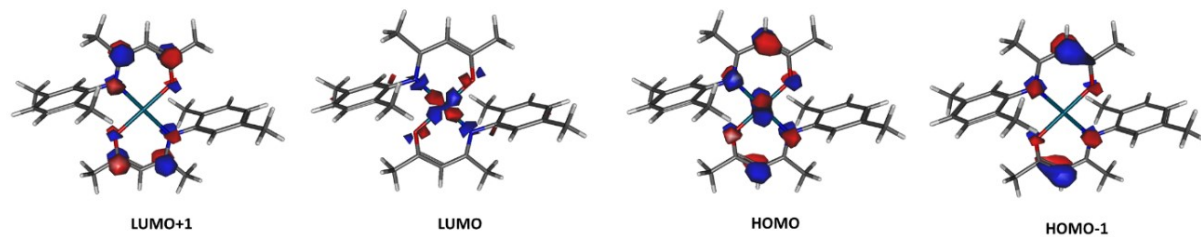

**Figure S86.** The isosurface densities of the frontier orbitals: LUMO+1, LUMO, HOMO, HOMO-1 of compound **4i** (isosurface value 0.06).

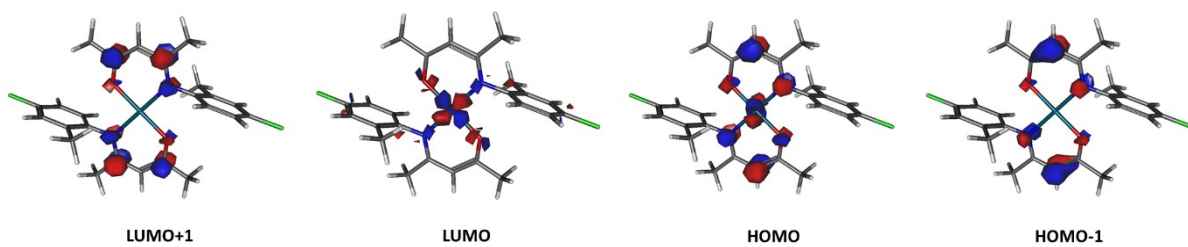

**Figure S87.** The isosurface densities of the frontier orbitals: LUMO+1, LUMO, HOMO, HOMO-1 of compound **4j** (isosurface value 0.06).

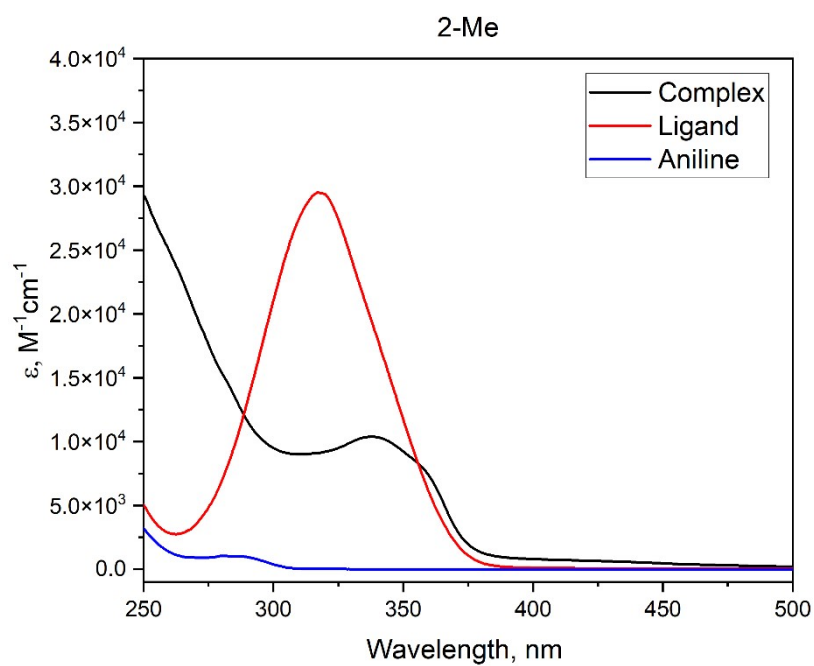

**Figure S88.** Electronic absorption spectra ( $CHCl_3$ , ambient temperature) of **2a**, **3a** and **4a**.

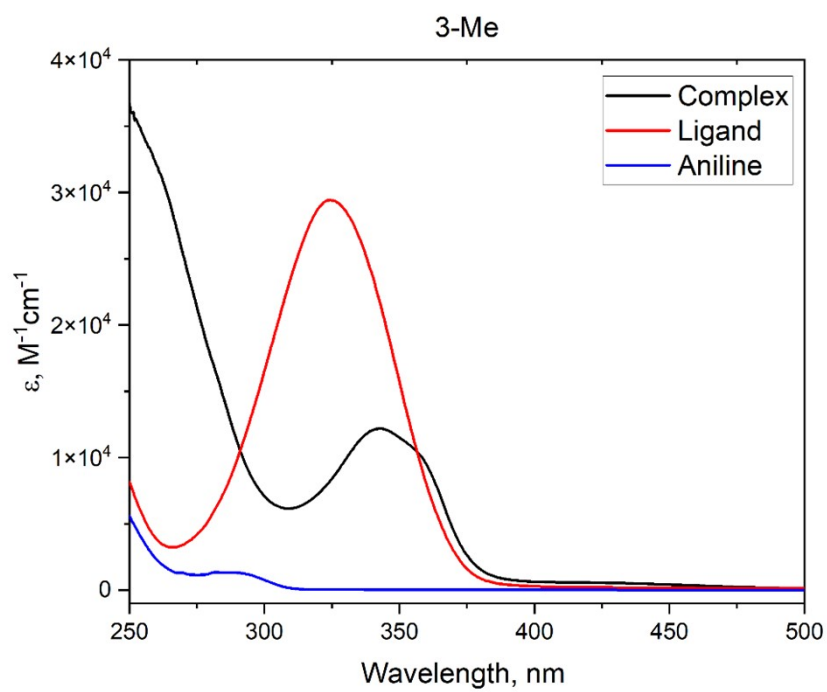

**Figure S89.** Electronic absorption spectra ( $CHCl_3$ , ambient temperature) of **2b**, **3b** and **4b**.

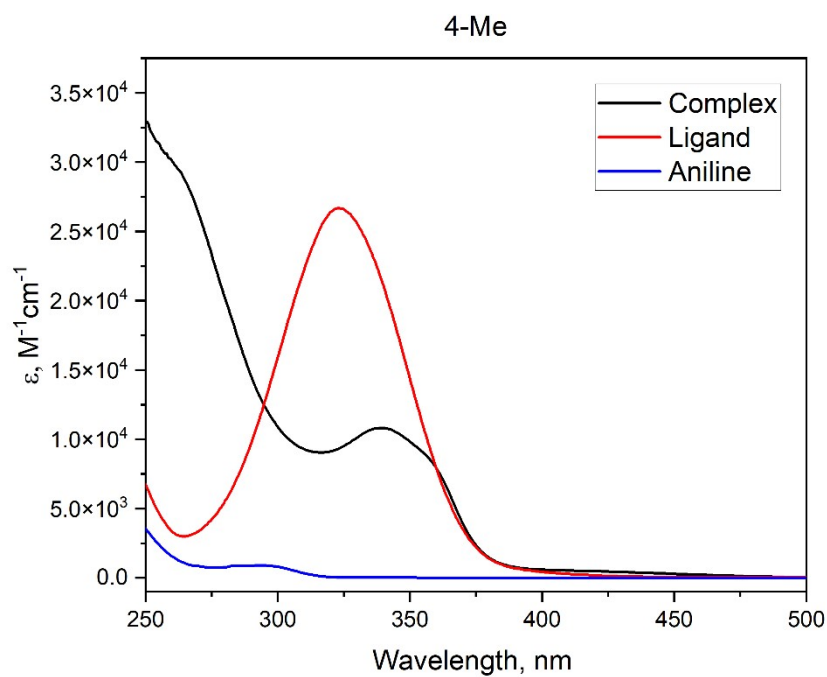

**Figure S90.** Electronic absorption spectra ( $\text{CHCl}_3$ , ambient temperature) of **2c**, **3c** and **4c**.

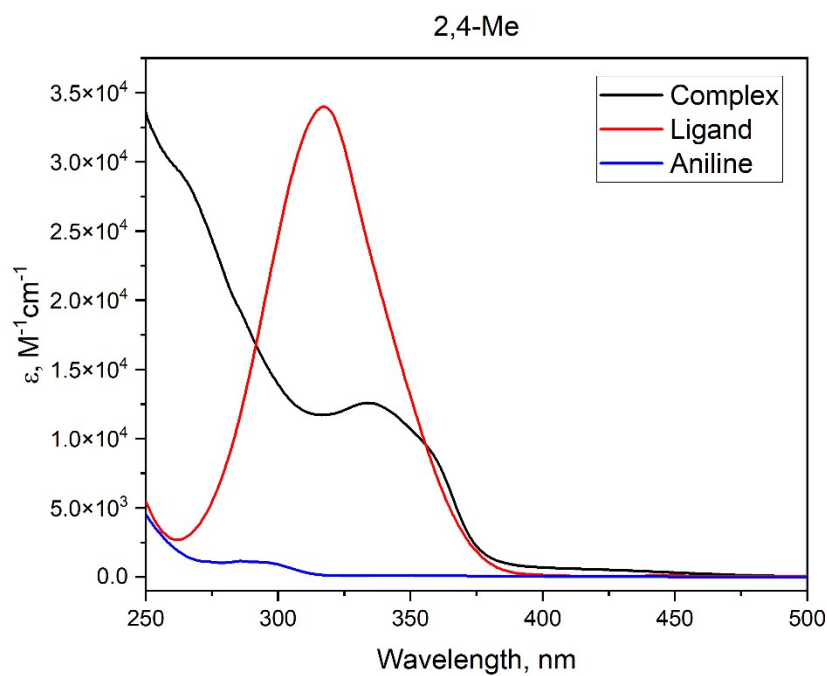

**Figure S91.** Electronic absorption spectra ( $\text{CHCl}_3$ , ambient temperature) of **2d**, **3d** and **4d**.

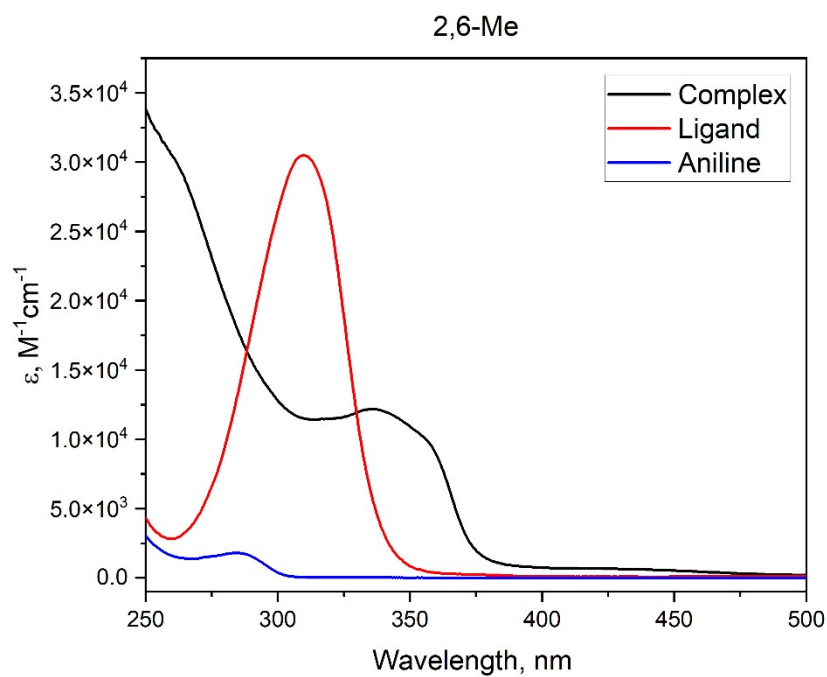

**Figure S82.** Electronic absorption spectra ( $\text{CHCl}_3$ , ambient temperature) of **2e**, **3e** and **4e**.

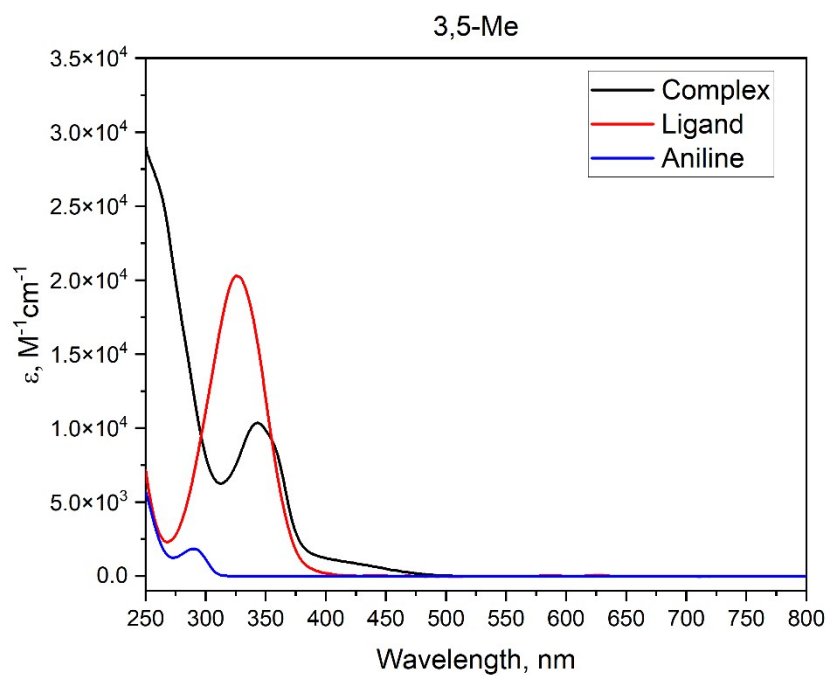

**Figure S93.** Electronic absorption spectra ( $\text{CHCl}_3$ , ambient temperature) of **2f**, **3f** and **4f**.

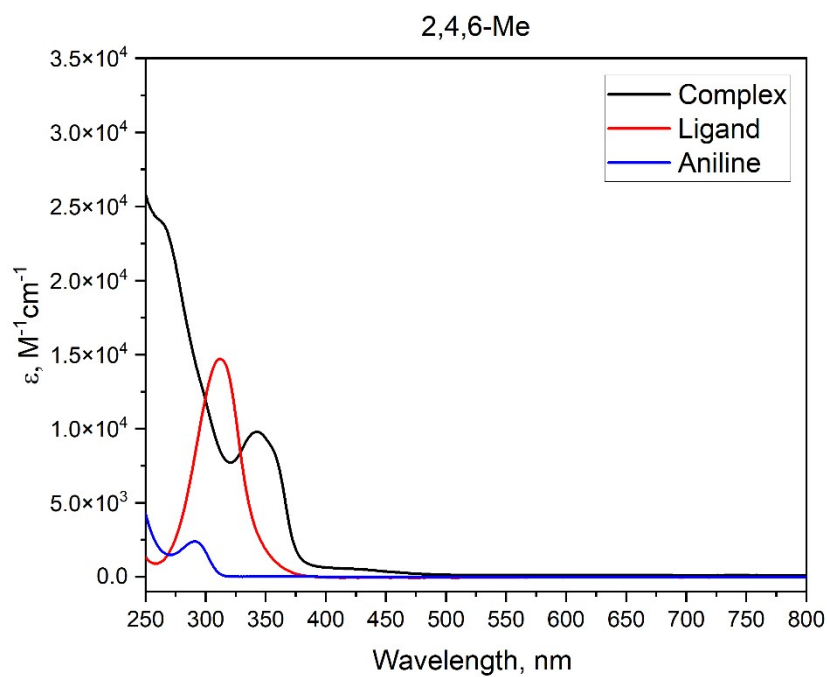

**Figure S94.** Electronic absorption spectra ( $\text{CHCl}_3$ , ambient temperature) of **2g**, **3g** and **4g**.

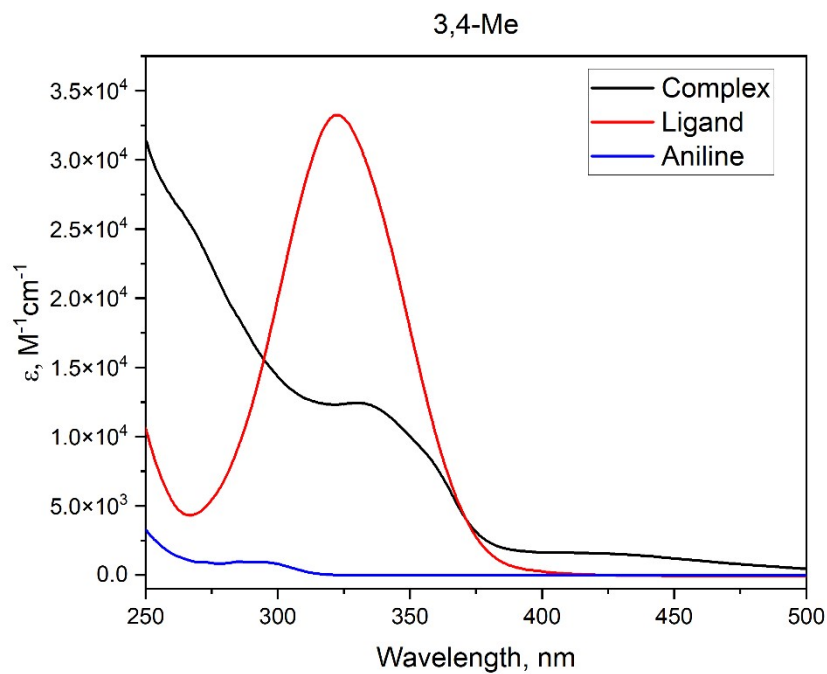

**Figure S95.** Electronic absorption spectra ( $\text{CHCl}_3$ , ambient temperature) of **2h**, **3h** and **4h**.

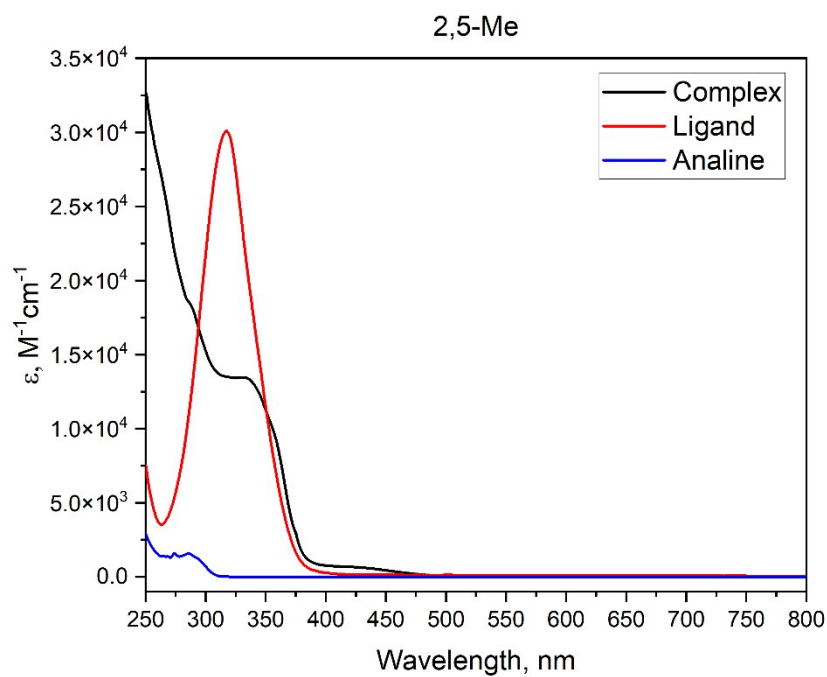

**Figure S96.** Electronic absorption spectra ( $CHCl_3$ , ambient temperature) of **2i**, **3i** and **4i**.

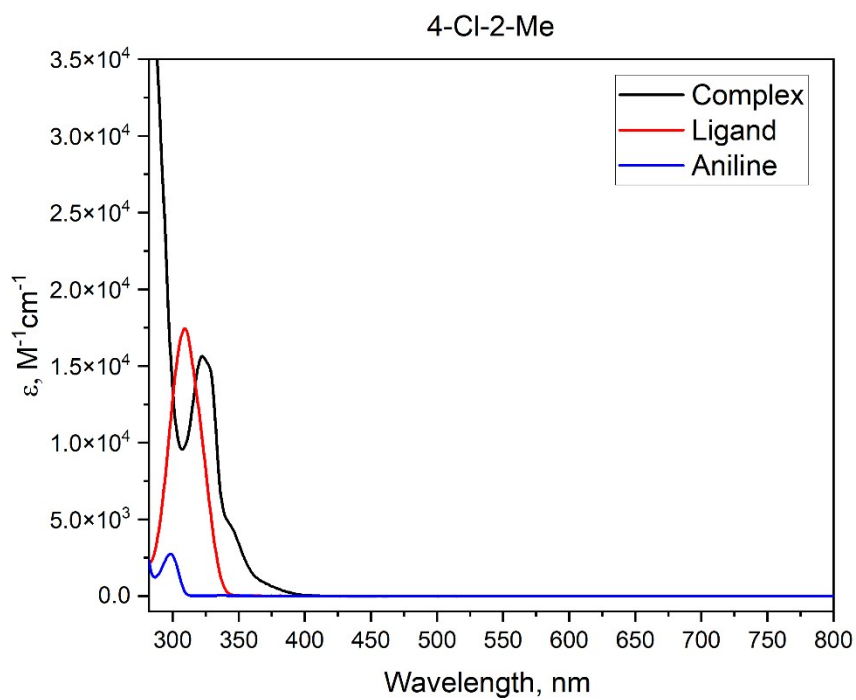

**Figure S97.** Electronic absorption spectra ( $CHCl_3$ , ambient temperature) of **2j**, **3j** and **4j**.

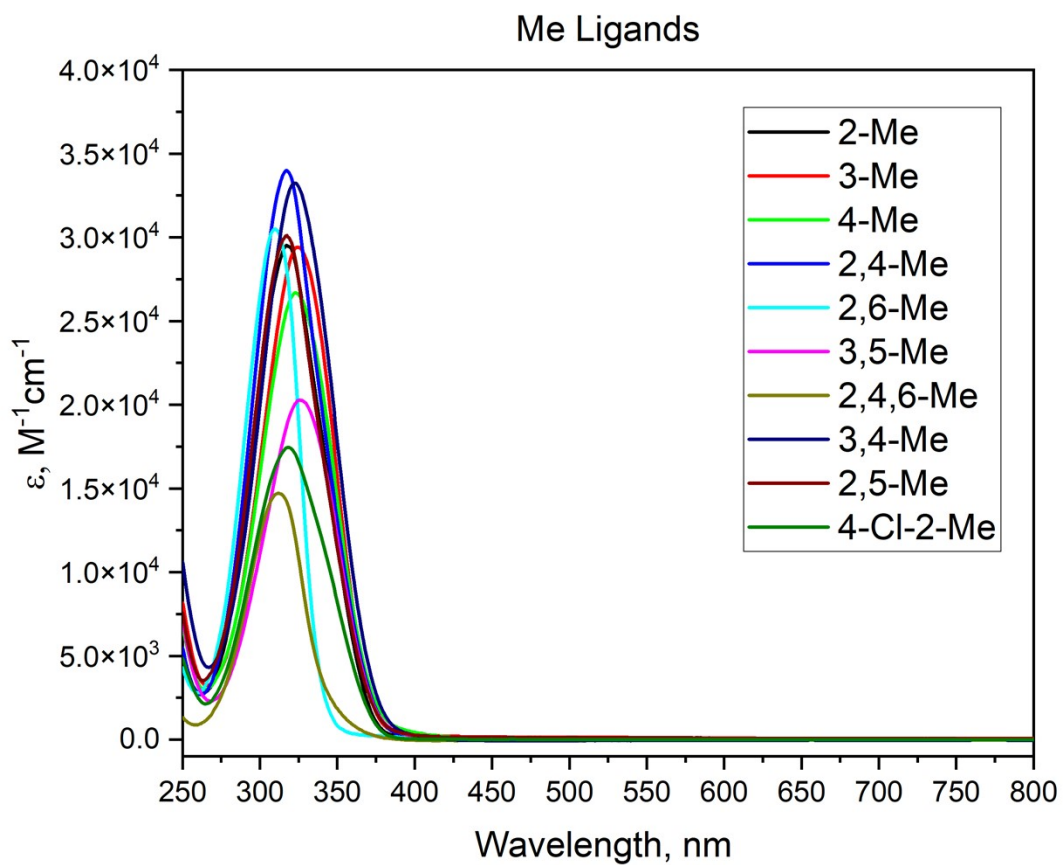

**Figure S98.** Electronic absorption spectra ( $\text{CHCl}_3$ , ambient temperature) of **3a-j**.

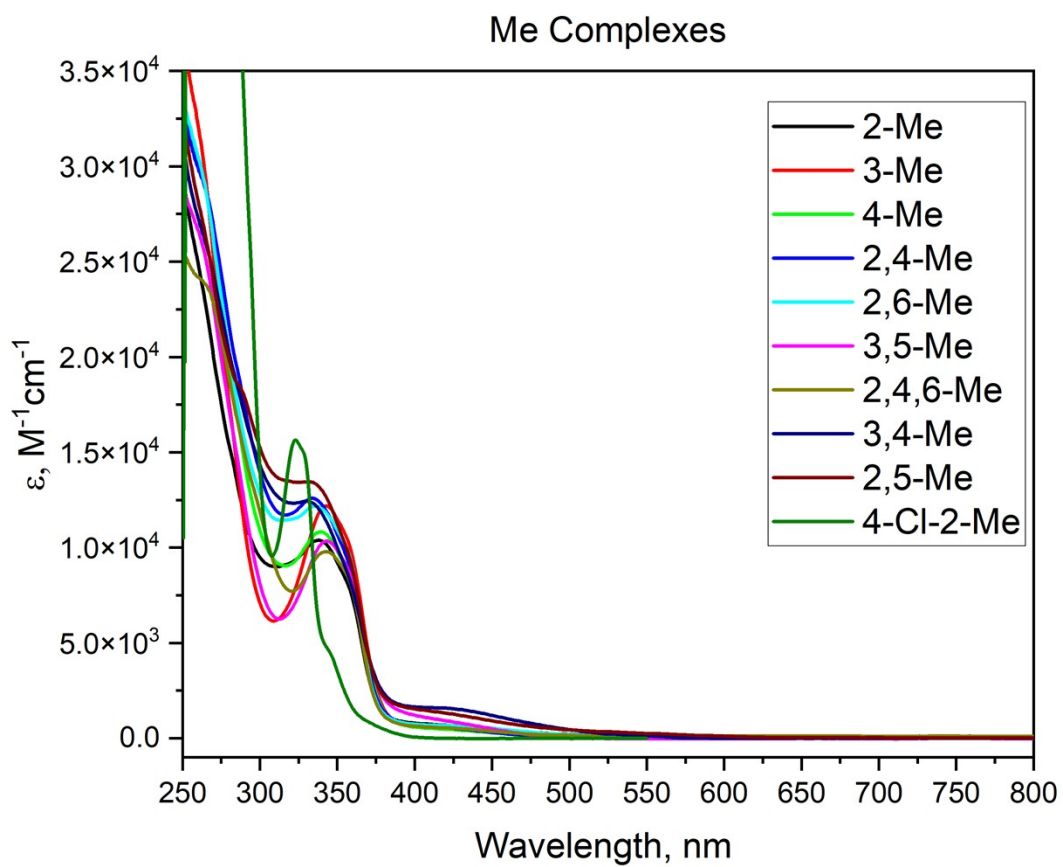

**Figure S99.** Electronic absorption spectra ( $\text{CHCl}_3$ , ambient temperature) of **4a-j**.

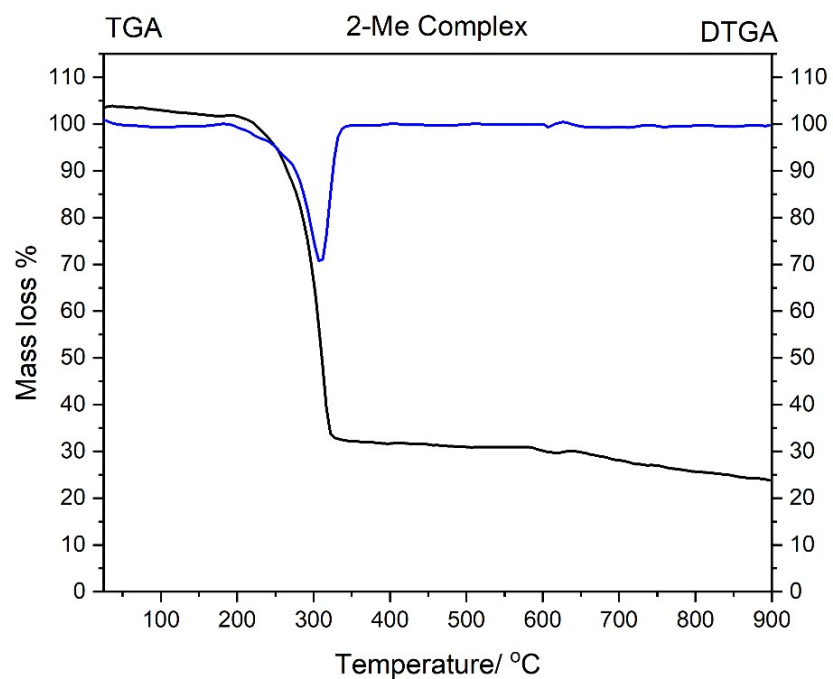

**Figure S100.** TGA thermogram for compound **4a**.

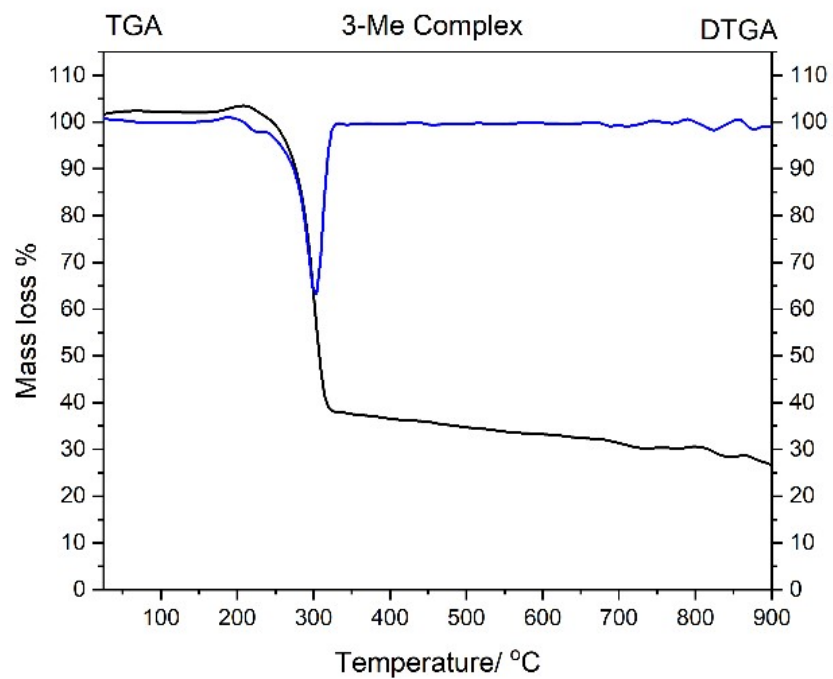

**Figure S101.** TGA thermogram for compound **4b**.

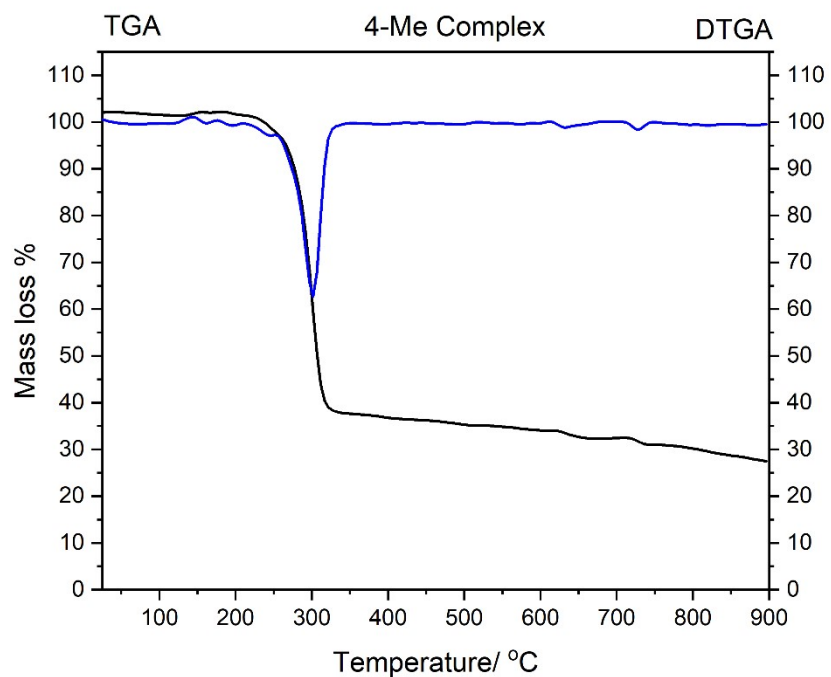

**Figure S102.** TGA thermogram for compound 4c.

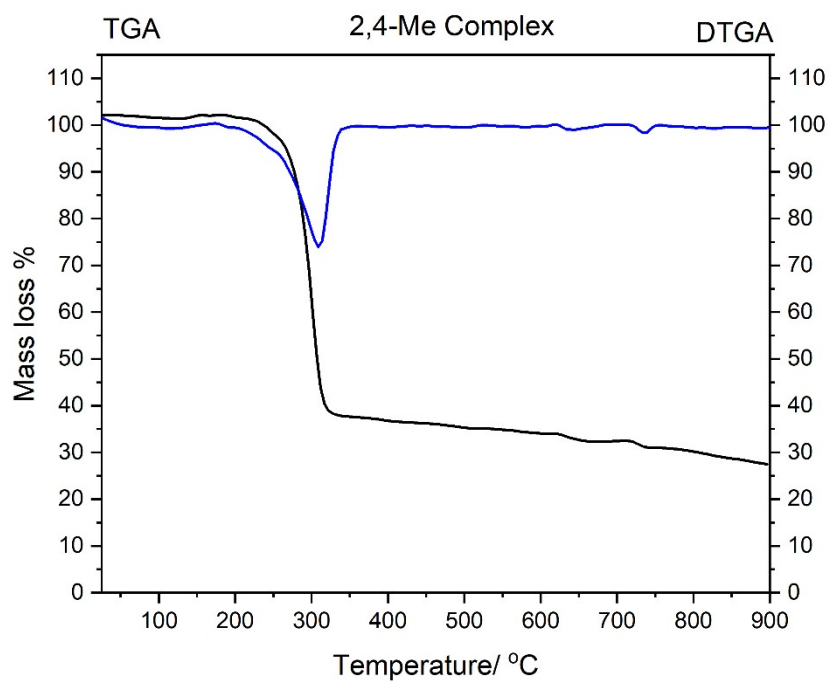

**Figure S103.** TGA thermogram for compound 4d.

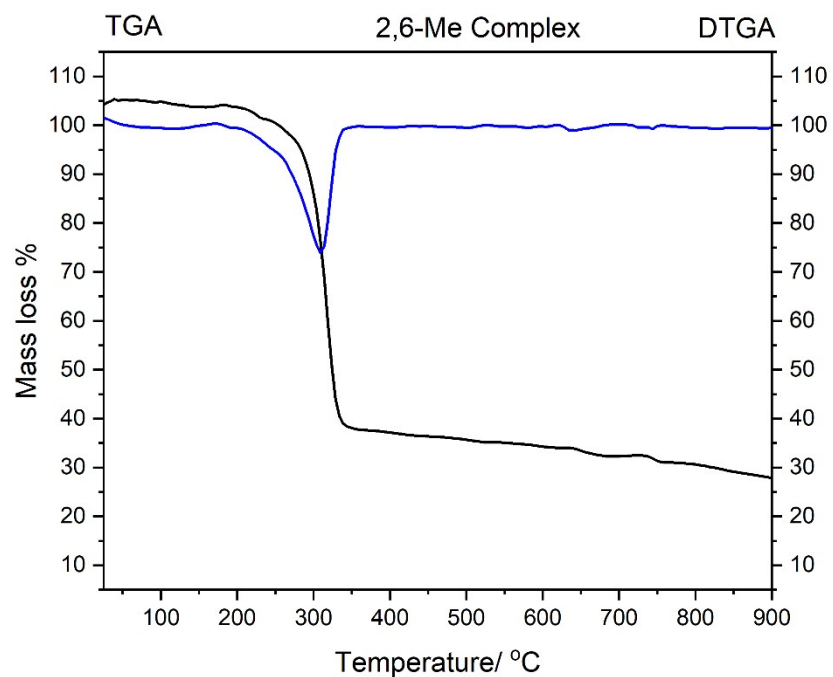

Figure S104. TGA thermograms for compound 4e.

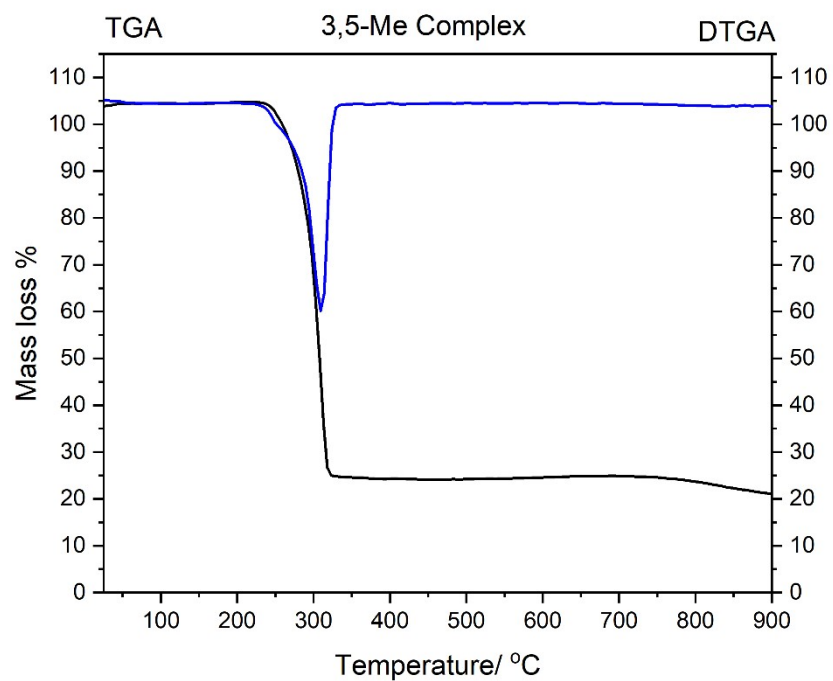

Figure S105. TGA thermograms for compound 4f.

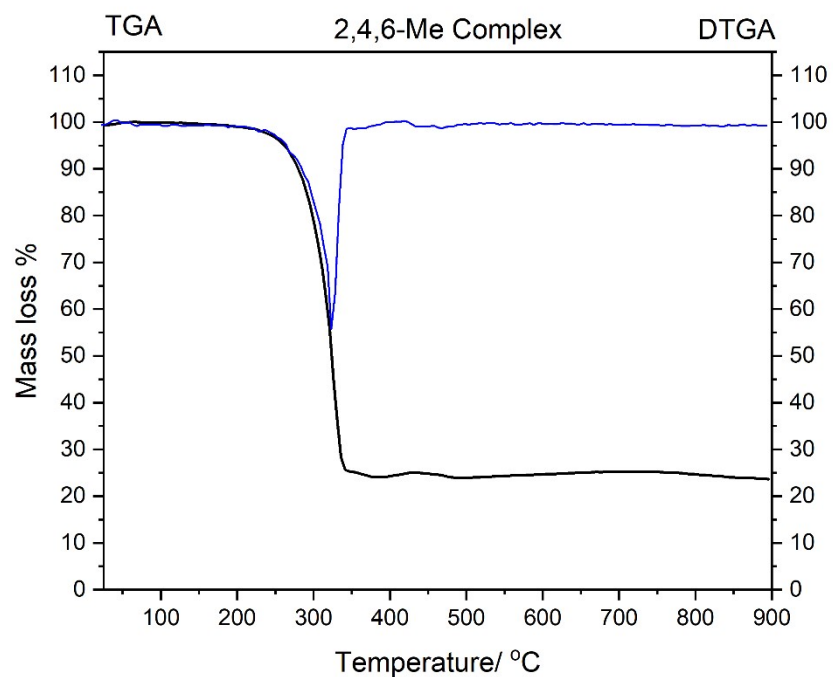

Figure S106. TGA thermograms for compound **4g**.

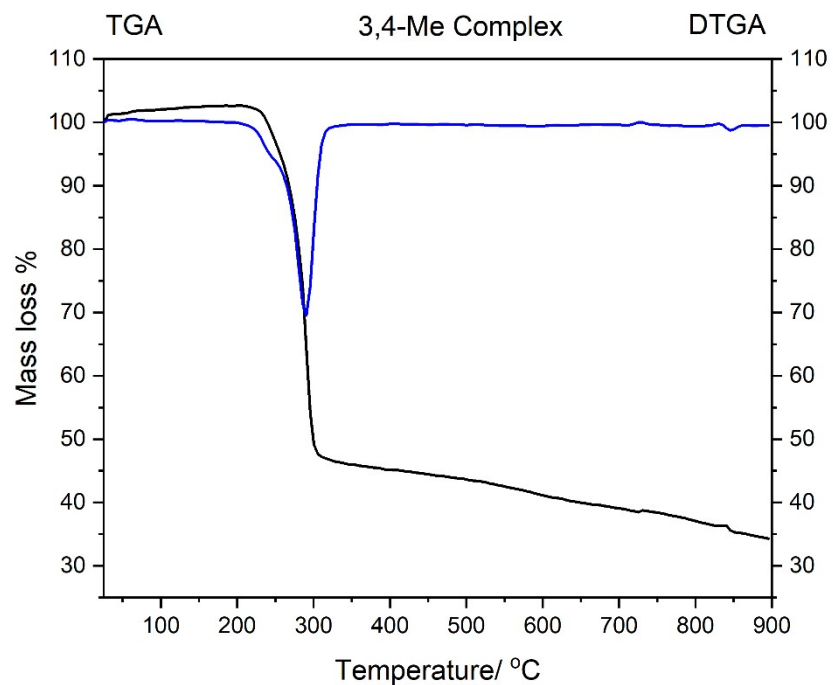

Figure S107. TGA thermograms for compound **4h**.

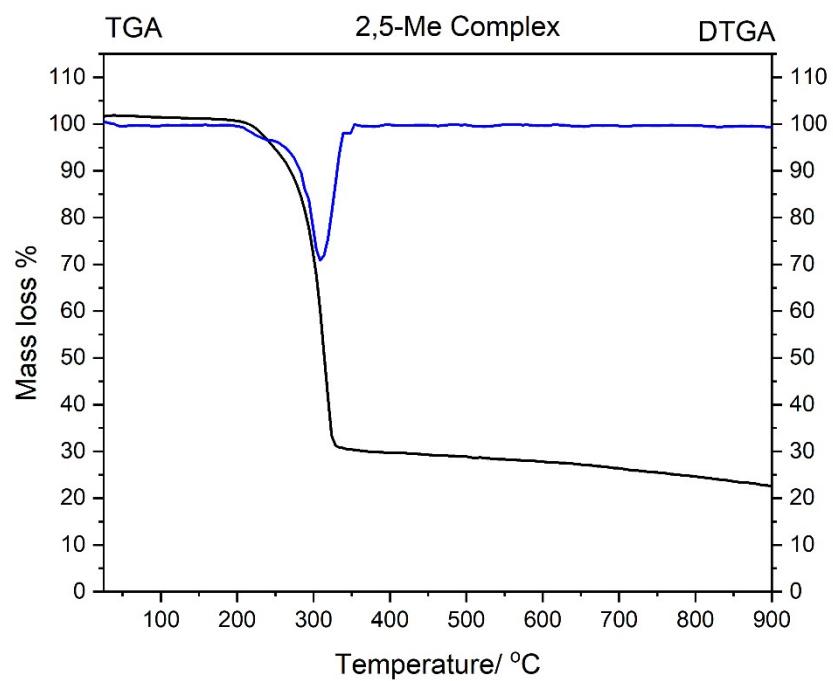

**Figure S108.** TGA thermograms for compound **4i**.

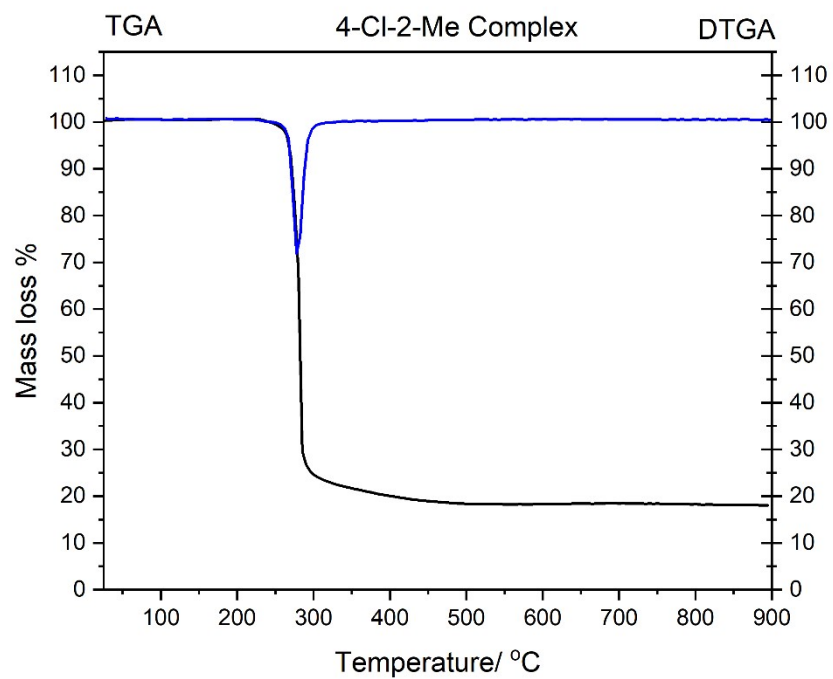

**Figure S109.** TGA thermograms for compound **4j**.

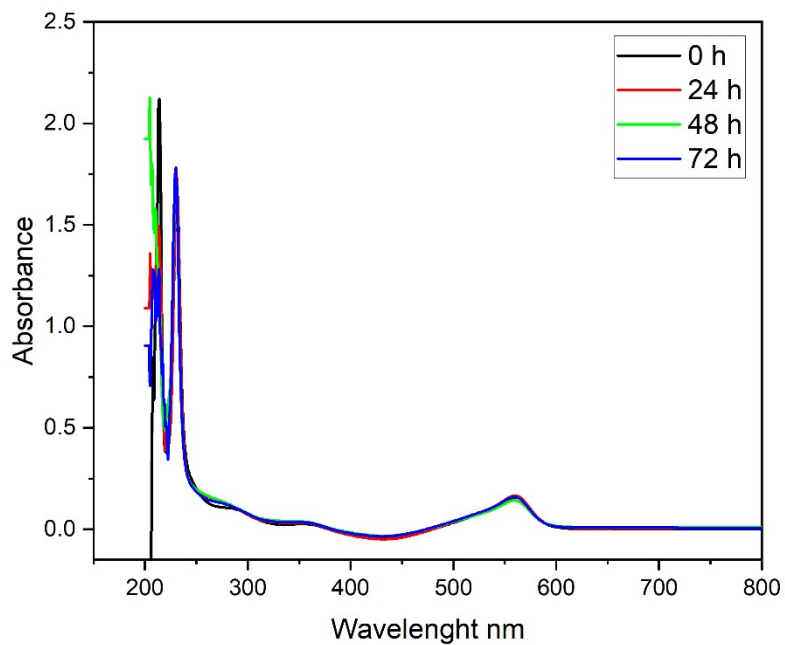

**Figure S110.** UV-Vis absorption spectra of the most active Pd(II) complex **4i** recorded in media at 25 °C.

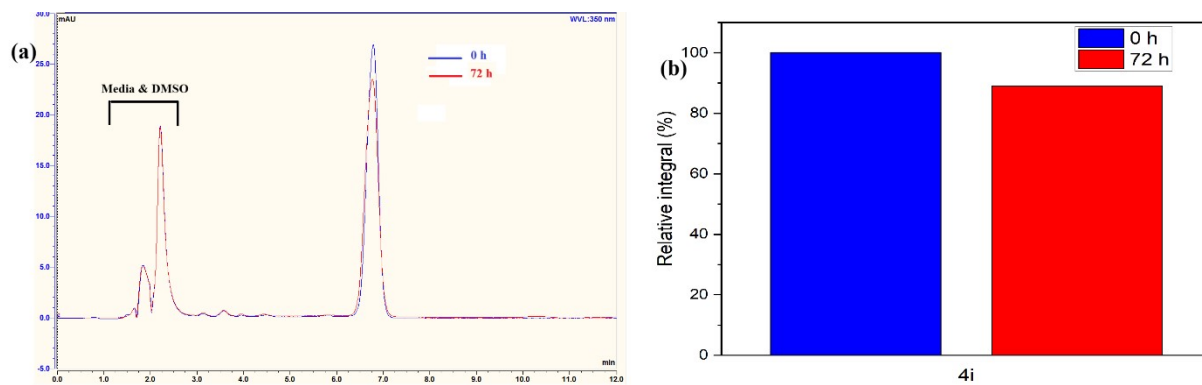

**Figure S111.** Monitoring the stability of complex **4i** in aqueous solution (3% DMSO) with HPLC. (a) Chromatograms at 350 nm. (b) Relative integral values.

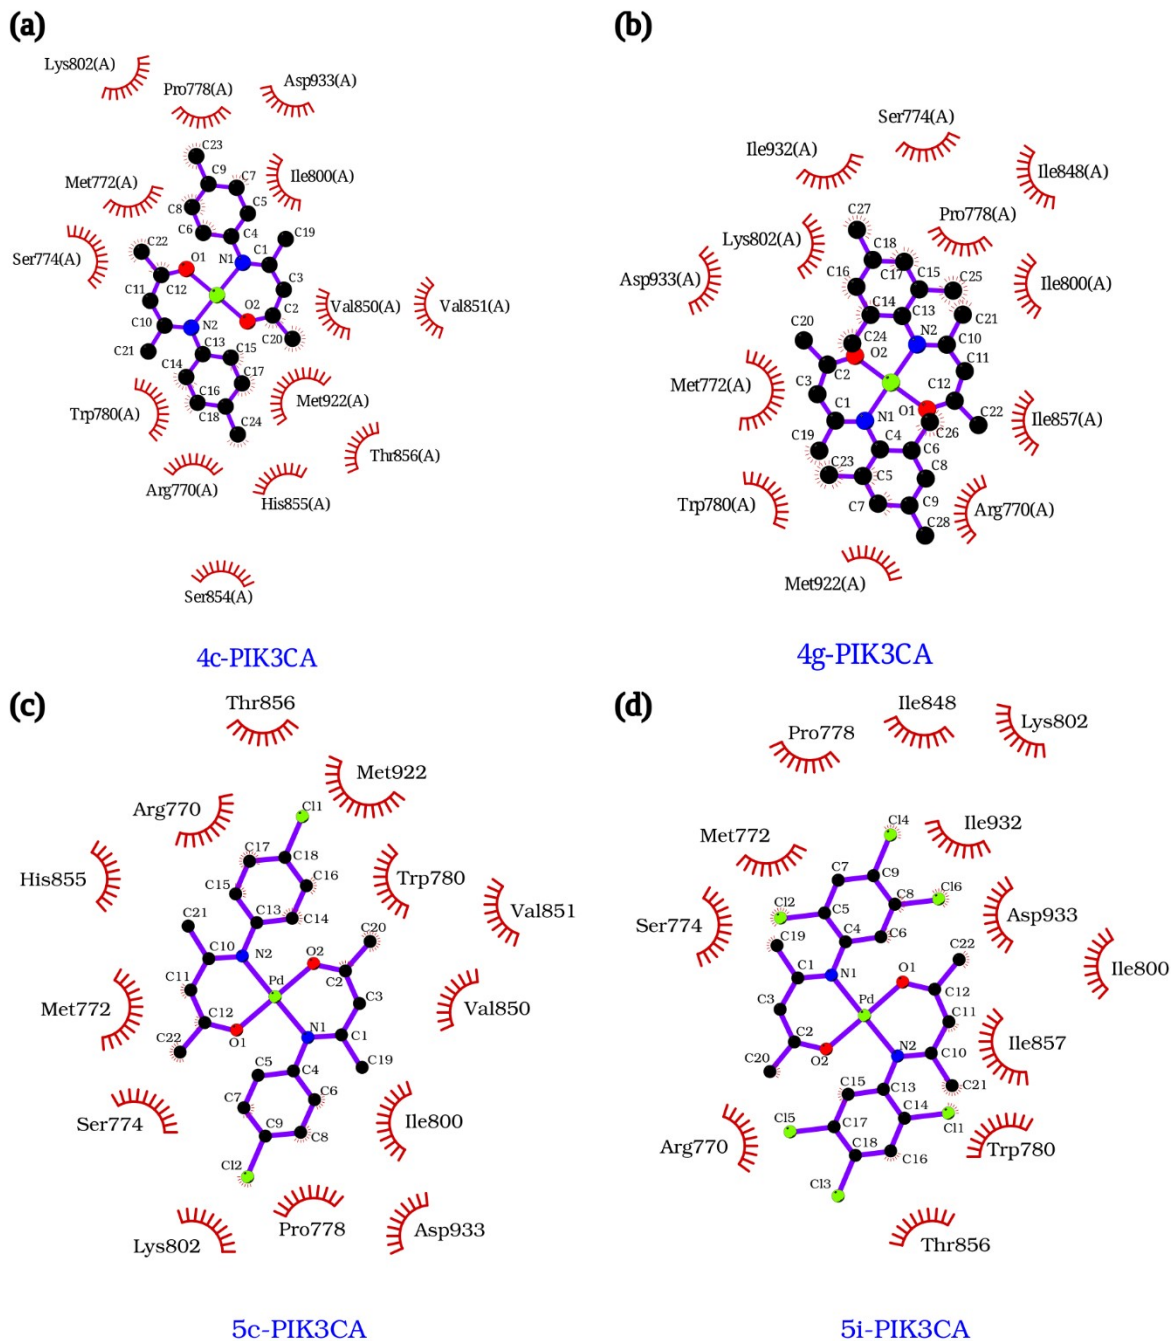

**Figure S112.** Ligand-protein interaction diagrams for the best- and worst-docked methyl- and chloride-substituted Pd(II) complexes on PIK3CA-E545K protein: (a) 4c-PIK3CA, (b) 4g-PIK3CA, (c) 5c-PIK3CA and (d) 5i-PIK3CA.

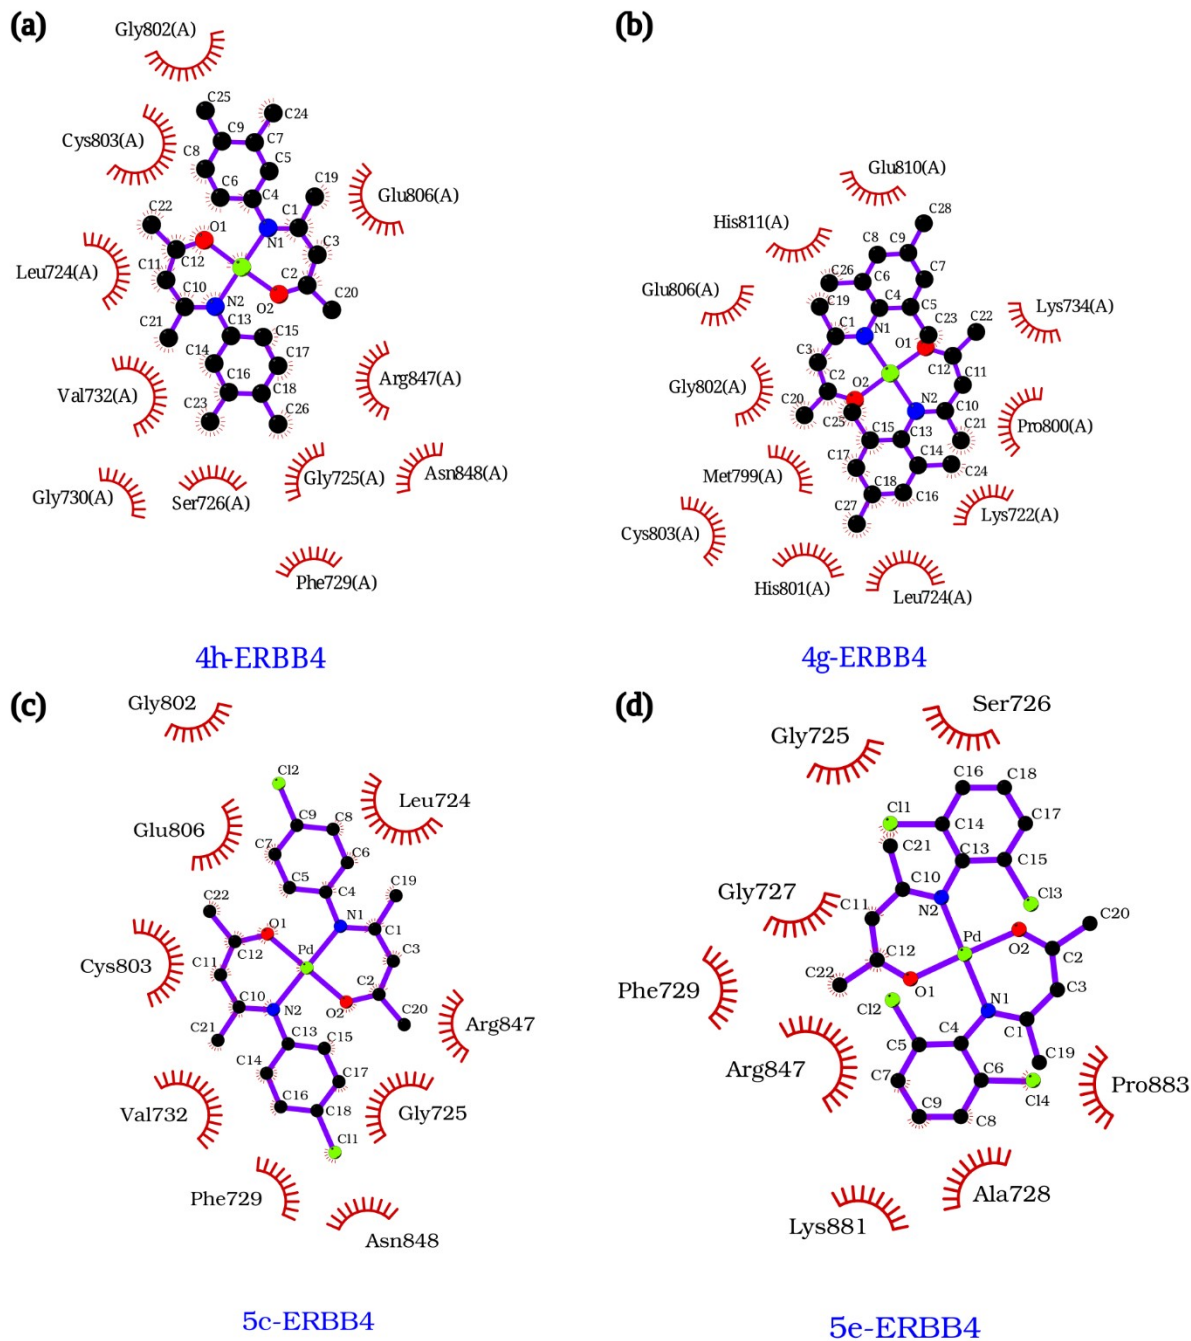

**Figure S113.** Ligand-protein interaction diagrams for the best- and worst-docked methyl- and chloride-substituted Pd(II) complexes on ERBB4-Y1242C protein: (a) 4h-ERBB4, (b) 4g-ERBB4, (c) 5c-ERBB4 and (d) 5e-ERBB4.

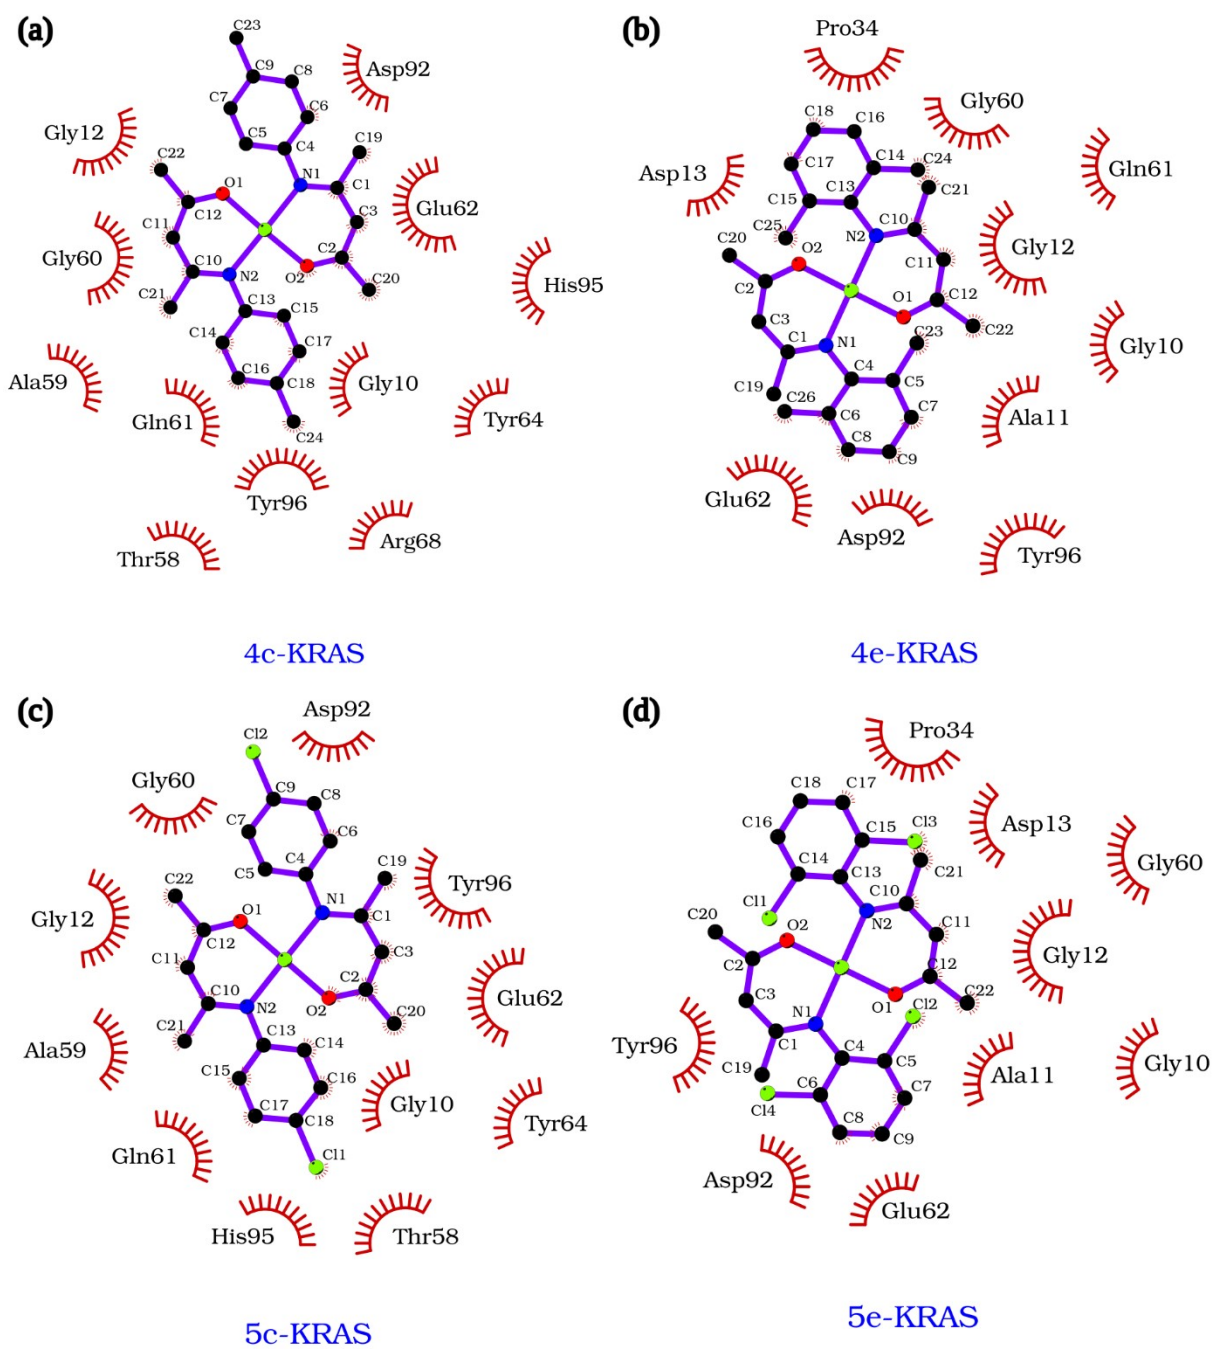

**Figure S114.** Ligand-protein interaction diagrams for the best- and worst-docked methyl- and chloride-substituted Pd(II) complexes on KRAS-G13D protein: (a) **4c-KRAS**, (b) **4e-KRAS**, (c) **5c-KRAS** and (d) **5e-KRAS**.

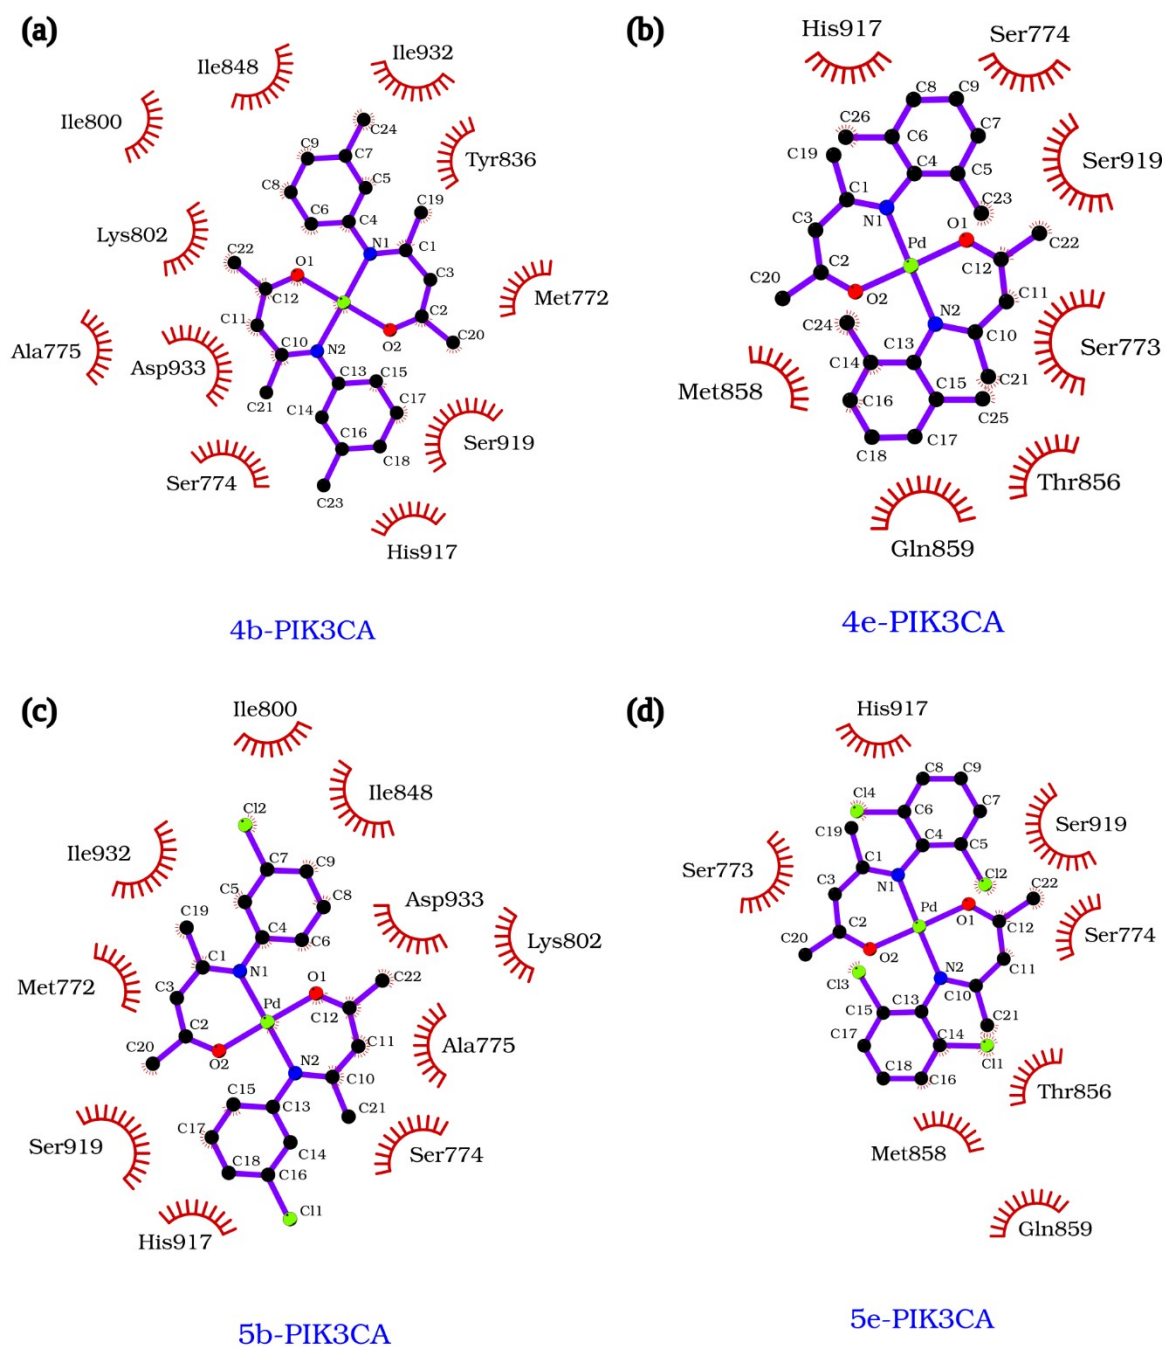

**Figure S115.** Ligand-protein interaction diagrams for the best- and worst-docked methyl- and chloride-substituted Pd(II) complexes on PIK3CA-H1047R protein: (a) **4b-PIK3CA**, (b) **4e-PIK3CA**, (c) **5b-PIK3CA**, and (d) **5e-PIK3CA**.

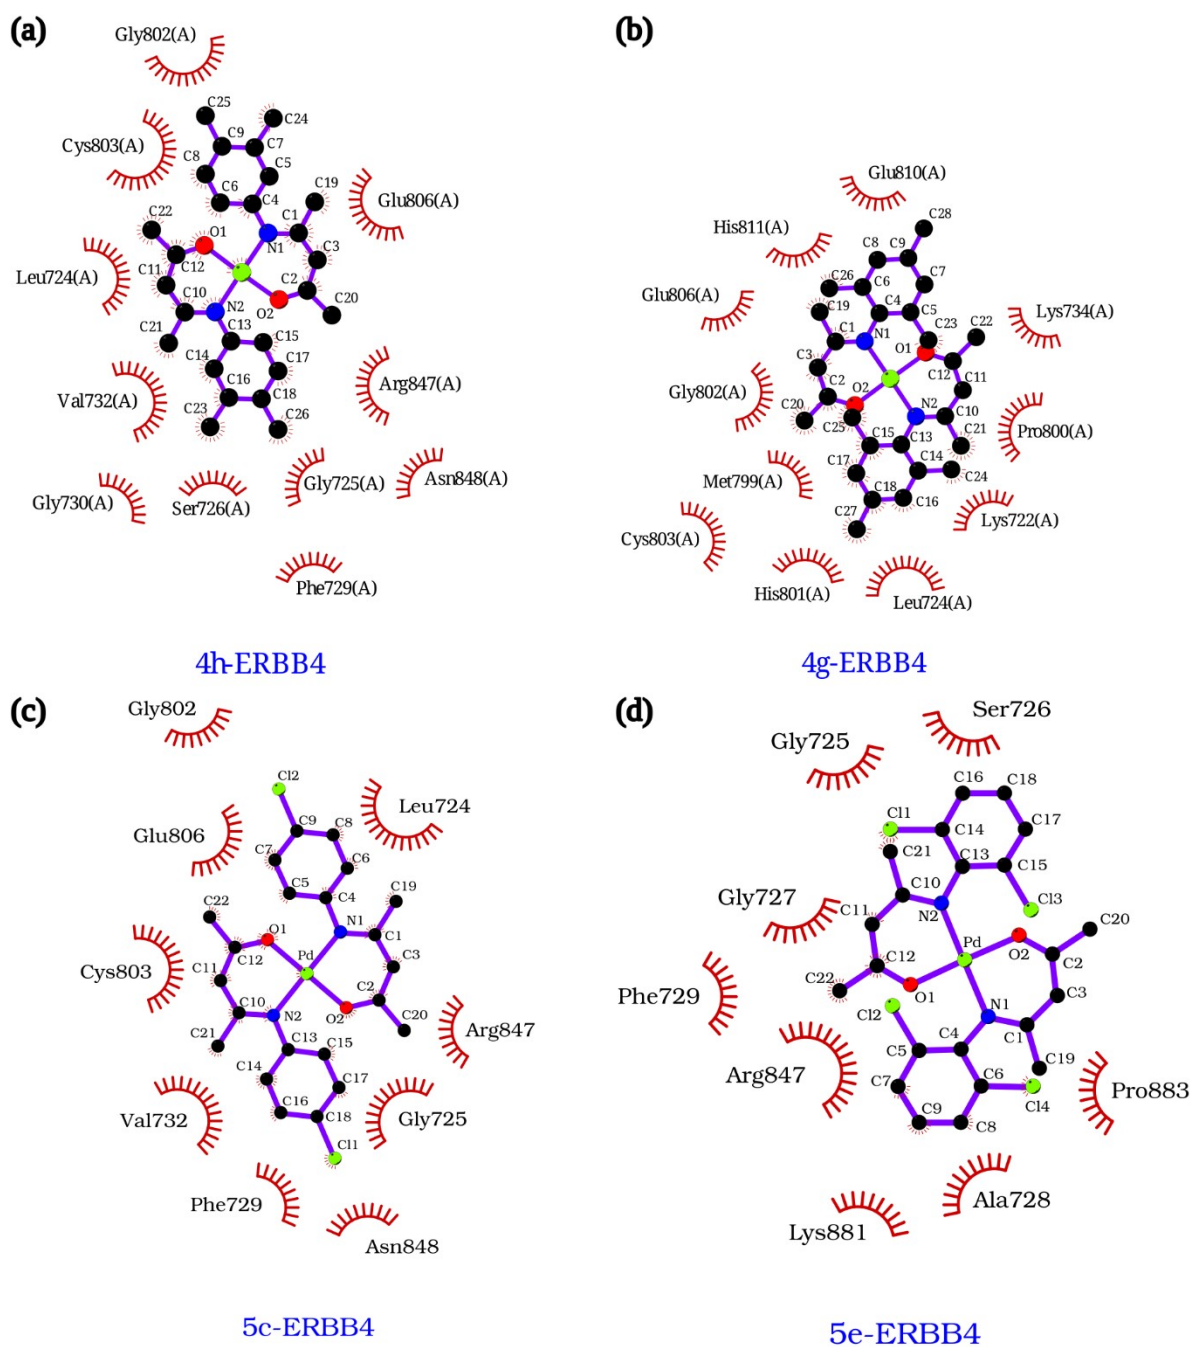

**Figure S116.** Ligand-protein interaction diagrams for the best- and worst-docked methyl- and chloride-substituted Pd(II) complexes on ATM-A112V protein: (a) **4b-ATM**, (b) **4g-ATM**, (c) **5b-ATM**, and (d) **5i-ATM**.

References:

- 1 G. K. Anderson, M. Lin, A. Sen and E. Gretz, in *Inorganic Syntheses*, ed. R. J. Angelici, John Wiley & Sons, Inc., Hoboken, NJ, USA, 2007, pp. 60–63.
- 2 D. M. Granum, P. J. Riedel, J. A. Crawford, T. K. Mahle, C. M. Wyss, A. K. Begej, N. Arulsamy, B. S. Pierce and M. P. Mehn, *Dalton Trans.*, 2011, **40**, 5881.
- 3 I. Hilker, J. F. G. A. Jansen and W. Posthumus, 2014.
- 4 M. Kidwai, S. Bhardwaj, N. K. Mishra, V. Bansal, A. Kumar and S. Mozumdar, *Catal. Commun.*, 2009, **10**, 1514–1517.
- 5 O. Marvi and L. Z. Fekri, *Comb. Chem. High Throughput Screen.*, 2018, **21**, 19–25.
- 6 H. Neelakantan, H.-Y. Wang, V. Vance, J. D. Hommel, S. F. McHardy and S. J. Watowich, *J. Med. Chem.*, 2017, **60**, 5015–5028.
- 7 G. Xie, Y. Li, J. Sun and C. Qian, *Inorg. Chem. Commun.*, 2009, **12**, 796–799.
- 8 D. Zheglova, D. Genov, S. Bolvig, P. Hansen, M. Hanfland and E. Dooryhee, *Acta Chem. Scand. - ACTA CHEM SCAND*, 1997, **51**, 1016–1023.
- 9 E. Yoshida and S. Yamada, *Bull. Chem. Soc. Jpn.*, 1965, **38**, 2179–2182.
- 10 A. N. Nesmeyanov, O. V. Nogina and V. A. Dubovitskii, *Bull. Acad. Sci. USSR Div. Chem. Sci.*, 1968, **17**, 514–520.
- 11 F. Neese, *WIREs Comput. Mol. Sci.*, 2012, **2**, 73–78.
- 12 C. Adamo and V. Barone, *J. Chem. Phys.*, 1999, **110**, 6158–6170.
- 13 F. Weigend and R. Ahlrichs, *Phys. Chem. Chem. Phys.*, 2005, **7**, 3297.
- 14 V. Barone and M. Cossi, *J. Phys. Chem. A*, 1998, **102**, 1995–2001.
- 15 M. Cossi, N. Rega, G. Scalmani and V. Barone, *J. Comput. Chem.*, 2003, **24**, 669–681.
- 16 R. Bauernschmitt and R. Ahlrichs, *Chem. Phys. Lett.*, 1996, **256**, 454–464.
- 17 I. K. Petrushenko and K. B. Petrushenko, *Spectrochim. Acta. A. Mol. Biomol. Spectrosc.*, 2018, **190**, 239–245.
- 18 A.-R. Allouche, *J. Comput. Chem.*, 2011, **32**, 174–182.
- 19 G. M. Sheldrick, *Acta Crystallogr. A*, 1990, **46**, 467–473.
- 20 Sheldrick, Gt M., 1997.
- 21 G. M. Sheldrick, *Acta Crystallogr. Sect. C Struct. Chem.*, 2015, **71**, 3–8.
- 22 G. M. Sheldrick, *Acta Crystallogr. A*, 2008, **64**, 112–122.

- 23 P. R. Spackman, M. J. Turner, J. J. McKinnon, S. K. Wolff, D. J. Grimwood, D. Jayatilaka and M. A. Spackman, *J. Appl. Crystallogr.*, 2021, **54**, 1006–1011.
- 24 M. Turner, J. McKinnon, S. Wolff, D. Grimwood, P. Spackman, D. Jayatilaka and M. Spackman, *Univ. West. Aust.*
- 25 R. B. Manawar, M. B. Gondaliya, M. K. Shah, M. M. Jotani and E. R. T. Tiekink, *Acta Crystallogr. Sect. E Crystallogr. Commun.*, 2019, **75**, 1423–1428.
- 26 D. Fabra, J. P. Mészáros, A. I. Matesanz, G. Spengler, F. Aguilar Rico, G. Moreno-Alcántar, A. Casini, É. A. Enyedy and A. G. Quiroga, *Inorg. Chem.*, 2025, **64**, 22852–22865.
- 27 F. Navas, F. Mendes, I. Santos, C. Navarro-Ranninger, S. Cabrera and A. G. Quiroga, *Inorg. Chem.*, 2017, **56**, 6175–6183.
- 28 Z. Sondka, N. B. Dhir, D. Carvalho-Silva, S. Jupe, Madhumita, K. McLaren, M. Starkey, S. Ward, J. Wilding, M. Ahmed, J. Argasinska, D. Beare, M. S. Chawla, S. Duke, I. Fasanella, A. G. Neogi, S. Haller, B. Hetenyi, L. Hodges, A. Holmes, R. Lyne, T. Maurel, S. Nair, H. Pedro, A. Sangrador-Vegas, H. Schuilenburg, Z. Sheard, S. Y. Yong and J. Teague, *Nucleic Acids Res.*, 2024, **52**, D1210–D1217.
- 29 X. Liu, Q. Zhou, J. R. Hart, Y. Xu, S. Yang, D. Yang, P. K. Vogt and M.-W. Wang, *Proc. Natl. Acad. Sci.*, 2022, **119**, e2215621119.
- 30 E. R. Wood, L. M. Shewchuk, B. Ellis, P. Brignola, R. L. Brashear, T. R. Caferro, S. H. Dickerson, H. D. Dickson, K. H. Donaldson, M. Gaul, R. J. Griffin, A. M. Hassell, B. Keith, R. Mullin, K. G. Petrov, M. J. Reno, D. W. Rusnak, S. M. Tadepalli, J. C. Ulrich, C. D. Wagner, D. E. Vanderwall, A. G. Waterson, J. D. Williams, W. L. White and D. E. Uehling, *Proc. Natl. Acad. Sci.*, 2008, **105**, 2773–2778.
- 31 C. Nilewski, S. Labadie, B. Wei, S. Malhotra, S. Do, L. Gazzard, L. Liu, C. Shao, J. Murray, Y. Izrayelit, A. Gustafson, N. F. Endres, F. Ma, X. Ye, J. Zou and M. Evangelista, *ACS Med. Chem. Lett.*, 2024, **15**, 21–28.
- 32 L. Buckbinder, D. J. St. Jean, T. Tieu, B. Ladd, B. Hilbert, W. Wang, J. T. Alltucker, S. Manimala, G. V. Kryukov, N. Brooijmans, G. Dowdell, P. Jonsson, M. Huff, A. Guzman-Perez, E. L. Jackson, M. D. Goncalves and D. D. Stuart, *Cancer Discov.*, 2023, **13**, 2432–2447.
- 33 K. Stakyte, M. Rotheneder, K. Lammens, J. D. Bartho, U. Grädler, T. Fuchß, U. Pehl, A. Alt, E. Van De Logt and K. P. Hopfner, *Nat. Struct. Mol. Biol.*, 2021, **28**, 789–798.
- 34 R. Krivák and D. Hoksza, *J. Cheminformatics*, 2015, **7**, 12.
- 35 R. Krivák and D. Hoksza, *J. Cheminformatics*, 2018, **10**, 39.
- 36 O. Trott and A. J. Olson, *J. Comput. Chem.*, 2010, **31**, 455–461.
- 37 J. Eberhardt, D. Santos-Martins, A. F. Tillack and S. Forli, *J. Chem. Inf. Model.*, 2021, **61**, 3891–3898.

- 38 N. M. O'Boyle, M. Banck, C. A. James, C. Morley, T. Vandermeersch and G. R. Hutchison, *J. Cheminformatics*, 2011, **3**, 33.
- 39 A. K. Rappe, C. J. Casewit, K. S. Colwell, W. A. Goddard and W. M. Skiff, *J. Am. Chem. Soc.*, 1992, **114**, 10024–10035.
- 40 A. C. Wallace, R. A. Laskowski and J. M. Thornton, *Protein Eng. Des. Sel.*, 1995, **8**, 127–134.
- 41 R. A. Laskowski and M. B. Swindells, *J. Chem. Inf. Model.*, 2011, **51**, 2778–2786.
- 42 T. D. Goddard, C. C. Huang, E. C. Meng, E. F. Pettersen, G. S. Couch, J. H. Morris and T. E. Ferrin, *Protein Sci.*, 2018, **27**, 14–25.
- 43 E. F. Pettersen, T. D. Goddard, C. C. Huang, E. C. Meng, G. S. Couch, T. I. Croll, J. H. Morris and T. E. Ferrin, *Protein Sci.*, 2021, **30**, 70–82.
- 44 E. C. Meng, T. D. Goddard, E. F. Pettersen, G. S. Couch, Z. J. Pearson, J. H. Morris and T. E. Ferrin, *Protein Sci.*, 2023, **32**, e4792.
- 45 D. Taher, Naim. H. Al-Said, M. Albanna, M. Kloda, M. Mustafa, W. Helal, K. I. Assaf, W. Hourani, W.-R. Kotob, S. Saleh, A. Makahleh and M. M. Rabba'a, *Inorganica Chim. Acta*, 2025, **583**, 122711.
- 46 D. Taher, S. Saleh, A. Y. Habashneh, W. Hourani, M. Mustafa, W. Helal, M. Al-Noaimi, S. M. Obeidat, M. Kloda, T. Alhindi, M. H. Kailani and A. Ghazzy, *J. Mol. Struct.*, 2025, **1340**, 142542.
